# Supplementary material
Source: Research Square preprint supplement (doi:10.21203/rs.3.rs-9281943/v1)

# Fossil-Free Fibreboard: Material Properties of an IonoSolv-Derived All-Wood Biocomposite

Mina Pourkhatoun, Koon-Yang Lee, Meredith Rose Barr

## Supplementary Materials

Supplementary Table 1. Experimental design detailing factor values associated with each condition number.

| Condition | Pattern | IL treatment temperature (°C) | IL treatment time (min) | Hot-press temperature (°C) | Hot-press time (h) | Hot-press pressure (tf) |
|-----------|---------|-------------------------------|-------------------------|----------------------------|--------------------|-------------------------|
| 1         | 00000   | 160                           | 60                      | 140                        | 3                  | 3                       |
| 2         | --000   | 150                           | 30                      | 140                        | 3                  | 3                       |
| 3         | --+000  | 150                           | 90                      | 140                        | 3                  | 3                       |
| 4         | +--000  | 170                           | 30                      | 140                        | 3                  | 3                       |
| 5         | ++000   | 170                           | 90                      | 140                        | 3                  | 3                       |
| 6         | 00--0   | 160                           | 60                      | 135                        | 2.5                | 3                       |
| 7         | 00--0   | 160                           | 60                      | 135                        | 3.5                | 3                       |
| 8         | 00+-0   | 160                           | 60                      | 145                        | 2.5                | 3                       |
| 9         | 00++0   | 160                           | 60                      | 145                        | 3.5                | 3                       |
| 10        | 0-00-   | 160                           | 30                      | 140                        | 3                  | 2                       |
| 11        | 0-00+   | 160                           | 30                      | 140                        | 3                  | 4                       |
| 12        | 00000   | 160                           | 60                      | 140                        | 3                  | 3                       |
| 13        | 0+00-   | 160                           | 90                      | 140                        | 3                  | 2                       |
| 14        | 0+00+   | 160                           | 90                      | 140                        | 3                  | 4                       |
| 15        | -0-00   | 150                           | 60                      | 135                        | 3                  | 3                       |
| 16        | -0+00   | 150                           | 60                      | 145                        | 3                  | 3                       |
| 17        | +0-00   | 170                           | 60                      | 135                        | 3                  | 3                       |
| 18        | +0+00   | 170                           | 60                      | 145                        | 3                  | 3                       |
| 19        | 000--   | 160                           | 60                      | 140                        | 2.5                | 2                       |
| 20        | 000+-   | 160                           | 60                      | 140                        | 2.5                | 4                       |
| 21        | 000+-   | 160                           | 60                      | 140                        | 3.5                | 2                       |
| 22        | 000++   | 160                           | 60                      | 140                        | 3.5                | 4                       |
| 24        | 0--00   | 160                           | 30                      | 135                        | 3                  | 3                       |
| 25        | 0--00   | 160                           | 30                      | 145                        | 3                  | 3                       |
| 26        | 0+-00   | 160                           | 90                      | 135                        | 3                  | 3                       |
| 27        | 0++00   | 160                           | 90                      | 145                        | 3                  | 3                       |
| 28        | -00-0   | 150                           | 60                      | 140                        | 2.5                | 3                       |
| 29        | -00+0   | 150                           | 60                      | 140                        | 3.5                | 3                       |
| 30        | +00-0   | 170                           | 60                      | 140                        | 2.5                | 3                       |
| 31        | +00+0   | 170                           | 60                      | 140                        | 3.5                | 3                       |
| 32        | 00-0-   | 160                           | 60                      | 135                        | 3                  | 2                       |
| 33        | 00-0+   | 160                           | 60                      | 135                        | 3                  | 4                       |
| 34        | 00000   | 160                           | 60                      | 140                        | 3                  | 3                       |
| 35        | 00+0-   | 160                           | 60                      | 145                        | 3                  | 2                       |
| 36        | 00+0+   | 160                           | 60                      | 145                        | 3                  | 4                       |
| 37        | -000-   | 150                           | 60                      | 140                        | 3                  | 2                       |
| 38        | -000+   | 150                           | 60                      | 140                        | 3                  | 4                       |
| 39        | +000-   | 170                           | 60                      | 140                        | 3                  | 2                       |
| 40        | +000+   | 170                           | 60                      | 140                        | 3                  | 4                       |
| 41        | 0-0-0   | 160                           | 30                      | 140                        | 2.5                | 3                       |
| 42        | 0-0+0   | 160                           | 30                      | 140                        | 3.5                | 3                       |
| 43        | 0+0-0   | 160                           | 90                      | 140                        | 2.5                | 3                       |
| 44        | 0+0+0   | 160                           | 90                      | 140                        | 3.5                | 3                       |

Supplementary Table 2. Goodness-of-fit metrics for regression models, calculated from predicted-versus-observed response values.  $R^2$  and RMSE are reported for each response. No regression models were fitted for backlit colour values because too many opaque samples had to be excluded due to artefactual blue reflection from the lightbox.

| Response variable               | Units                                      | $R^2$ | RMSE   |
|---------------------------------|--------------------------------------------|-------|--------|
| Powder yield                    | fraction (0–1)                             | 0.96  | 0.0188 |
| Fused fraction                  | fraction (0–1)                             | 0.79  | 0.149  |
| Overall yield                   | fraction (0–1)                             | 0.76  | 0.104  |
| Ultimate tensile strength (UTS) | MPa                                        | 0.38  | 4.54   |
| Young's modulus                 | GPa                                        | 0.54  | 1.28   |
| Envelope density                | $\text{g/cm}^3$                            | 0.20  | 0.0318 |
| Specific strength               | $\text{MPa}/(\text{g/cm}^3)$               | 0.44  | 3.27   |
| Specific stiffness              | $\text{GPa}/(\text{g/cm}^3)$               | 0.47  | 0.956  |
| Contact angle                   | °                                          | 0.40  | 4.21   |
| UVA blocking                    | percentage points                          | 0.05  | 0.0092 |
| UVB blocking                    | percentage points                          | 0.03  | 0.0536 |
| UVC blocking                    | percentage points                          | 0.03  | 0.0318 |
| Visible light transmittance     | percentage points                          | 0.24  | 0.0837 |
| Frontlit $L^*$                  | CIE $L^*$ (0–100)                          | 0.18  | 3.53   |
| Frontlit $a^*$                  | CIE $a^*$ (dimensionless; no fixed bounds) | 0.86  | 1.68   |
| Frontlit $b^*$                  | CIE $b^*$ (dimensionless; no fixed bounds) | 0.78  | 1.38   |

Supplementary Figures 1-100. Stress-strain curves for each sample tested by condition number, plotted until the break point as detected by the maximum decrease in measured force applied and increase in measured strain between timepoints.

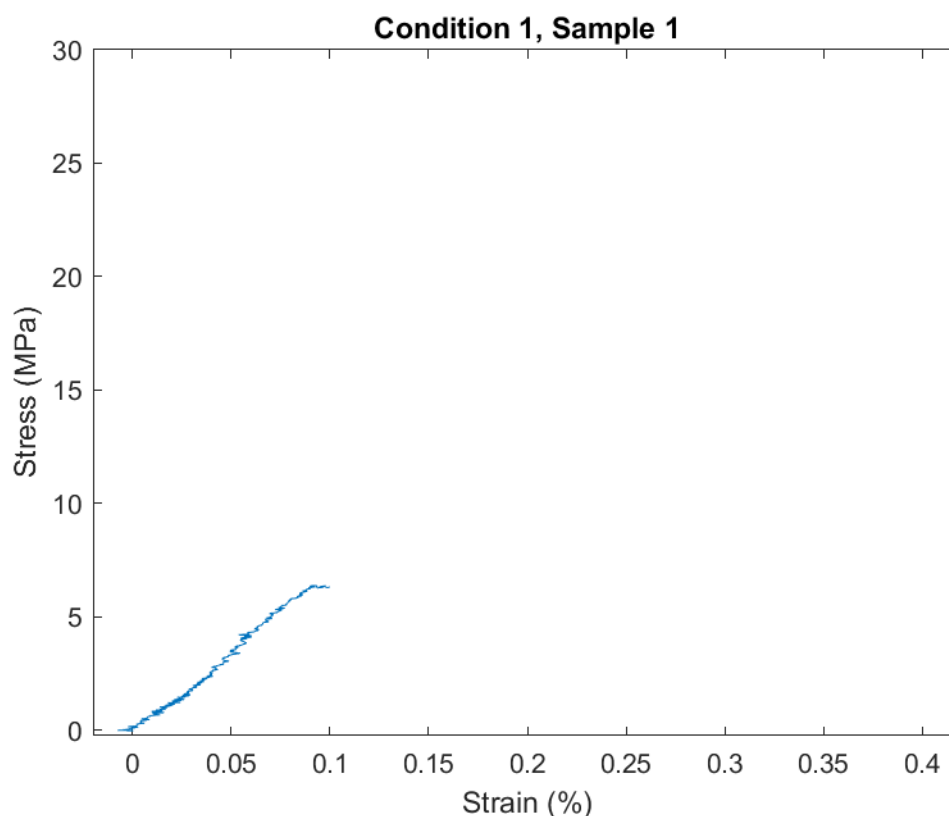

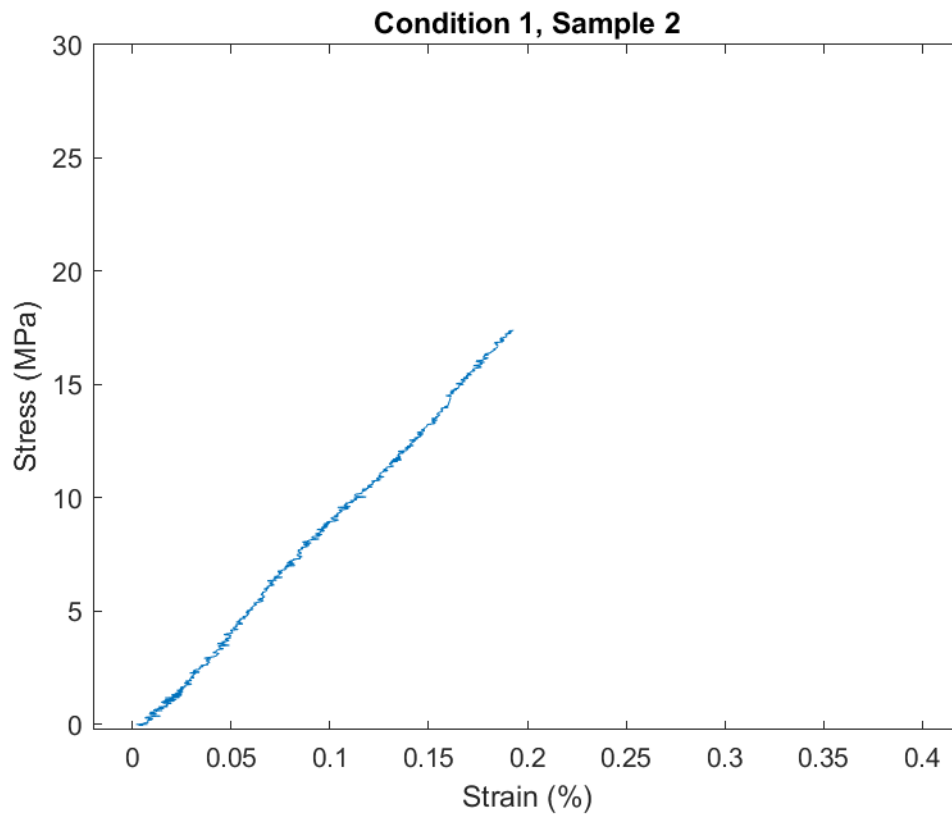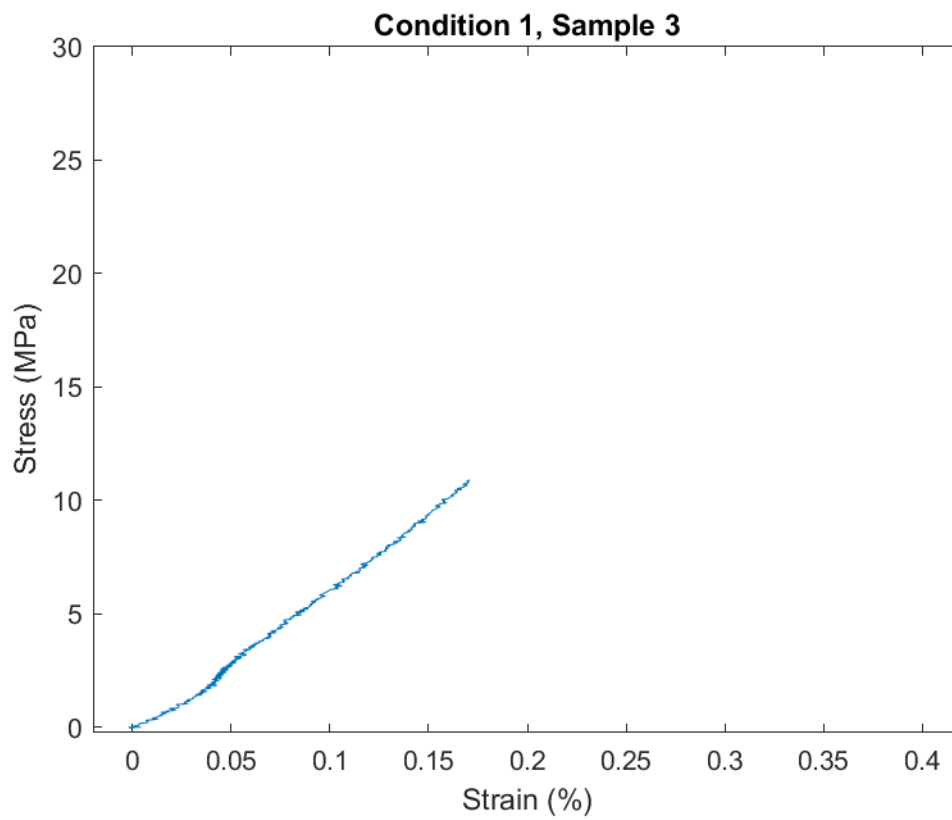

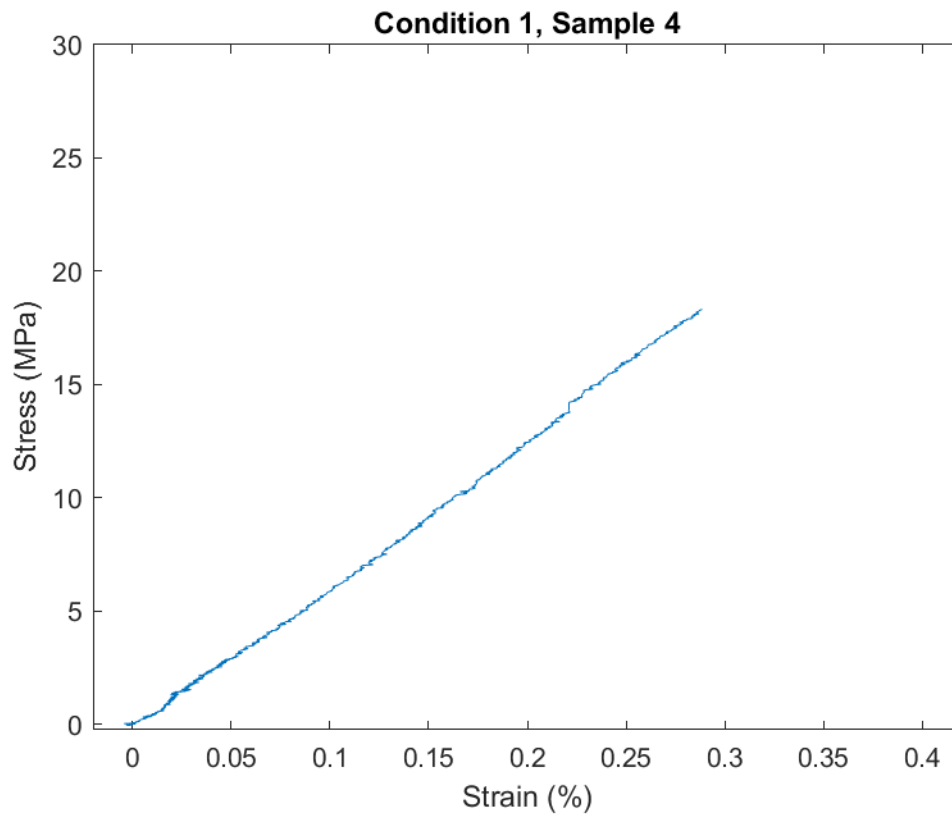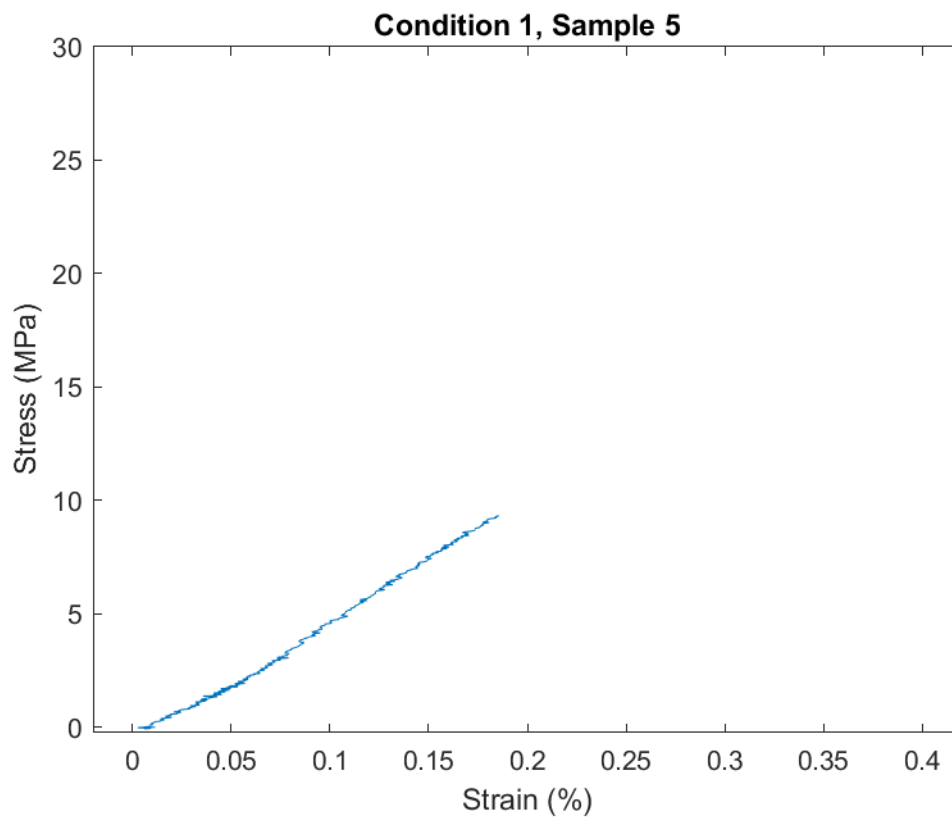

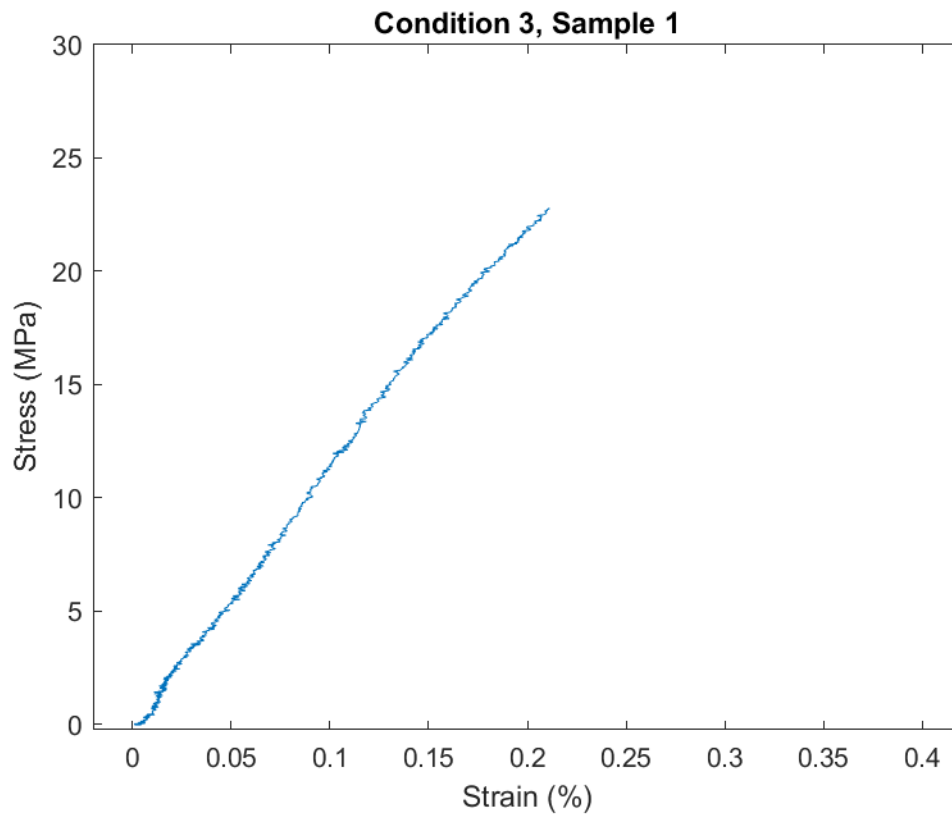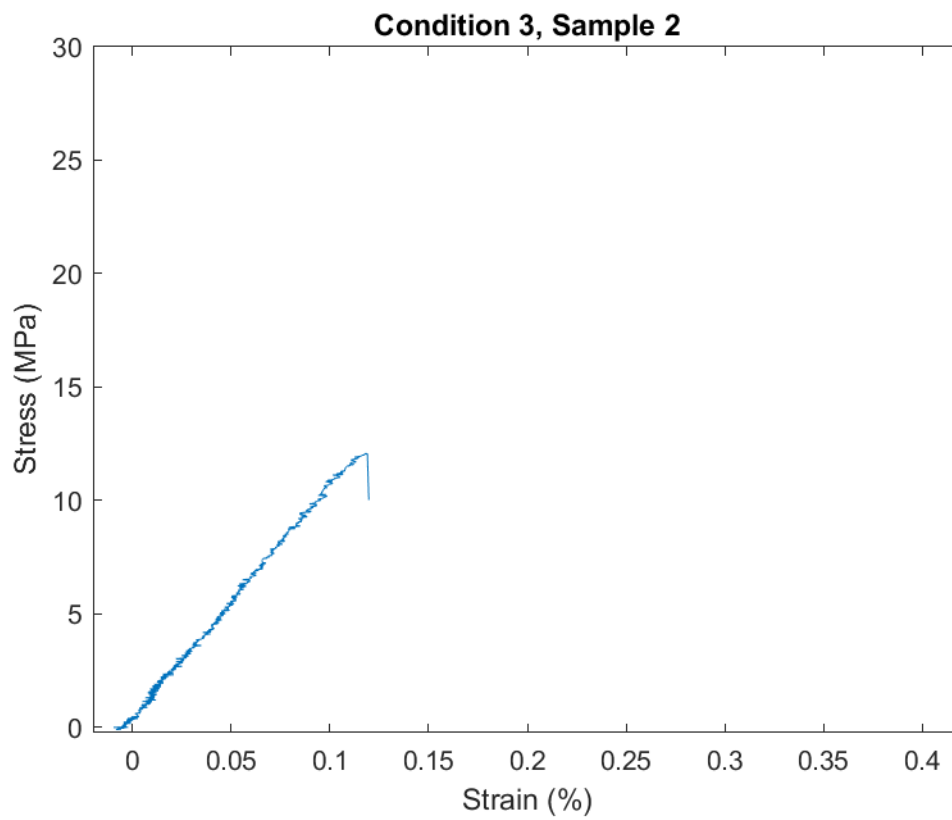

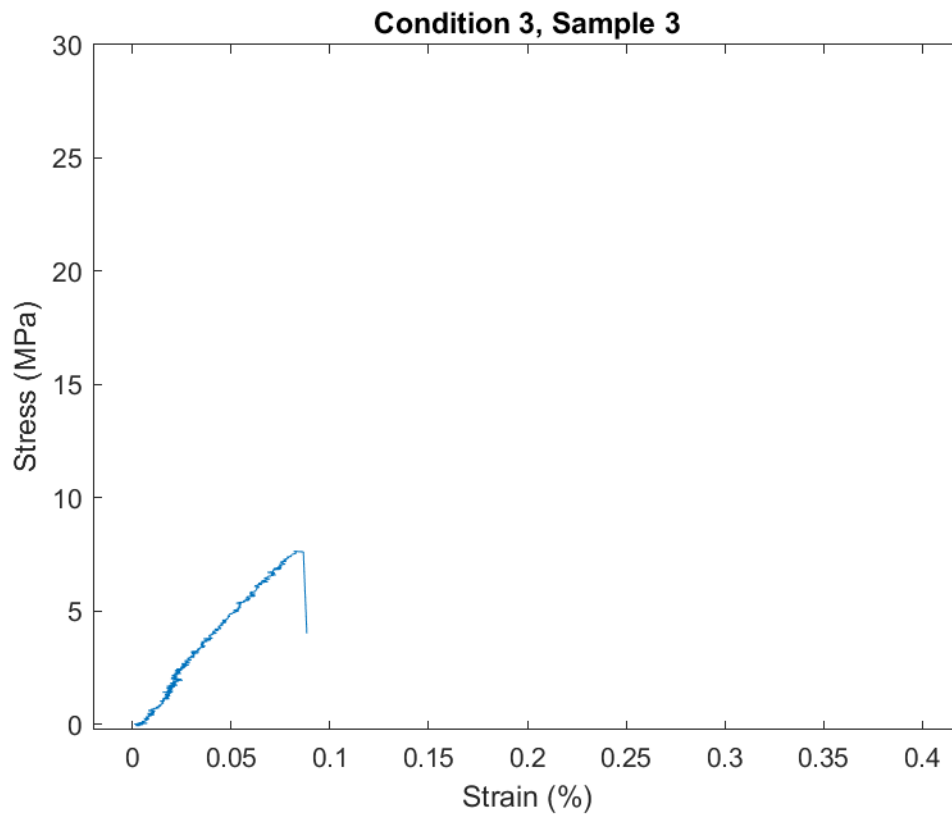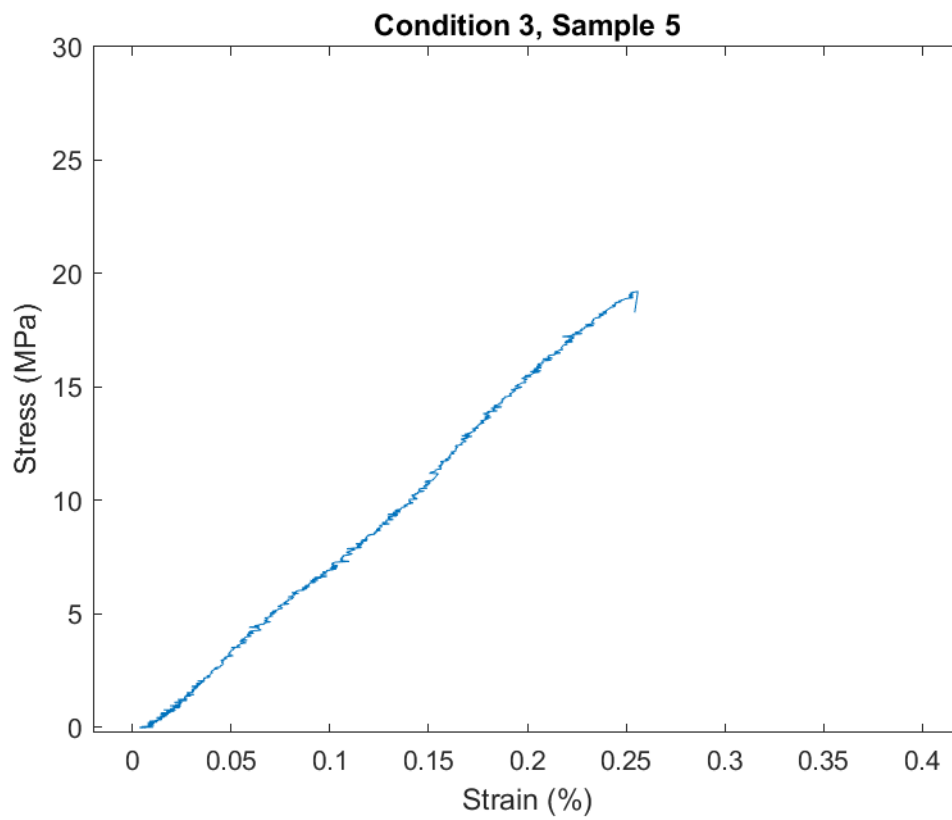

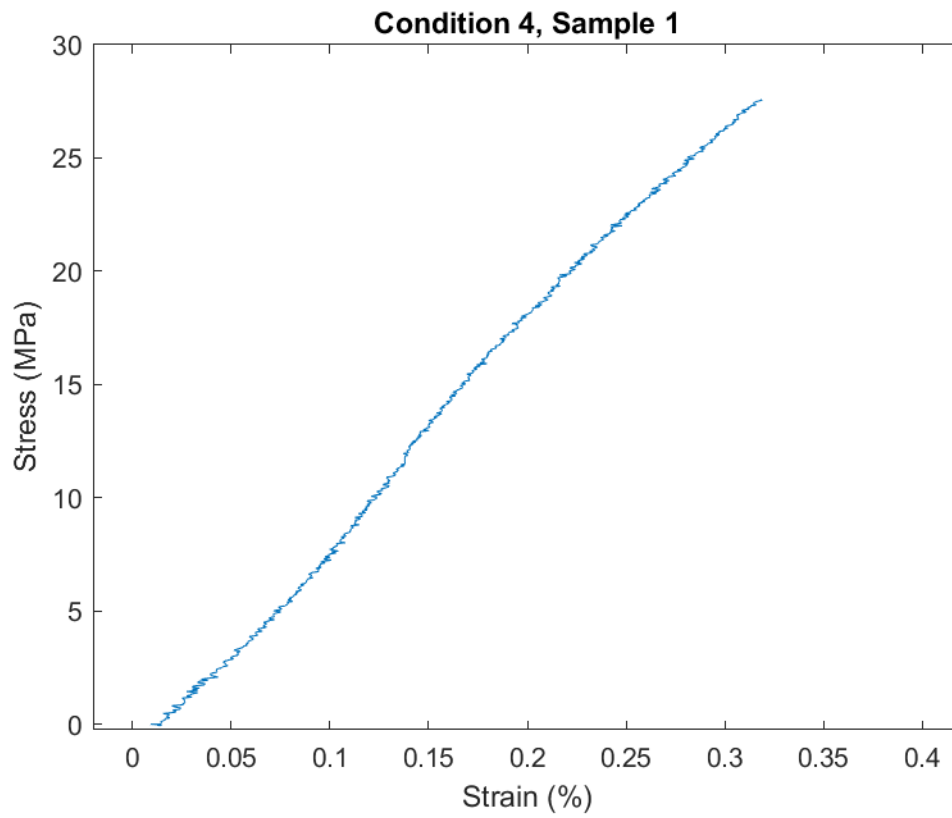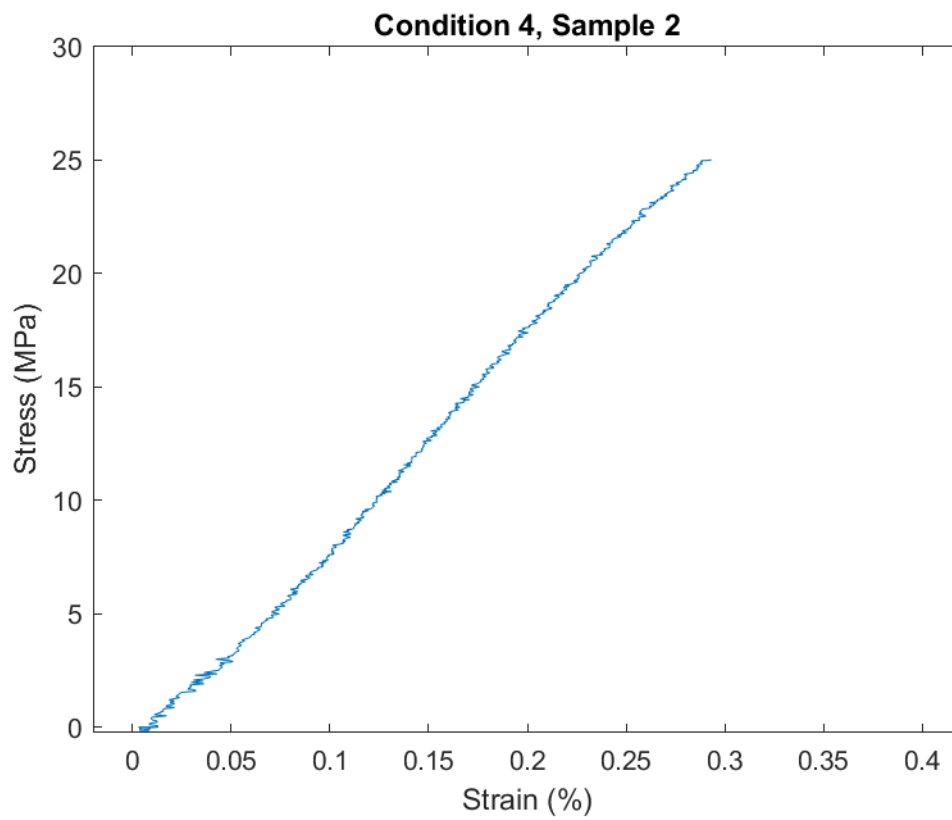

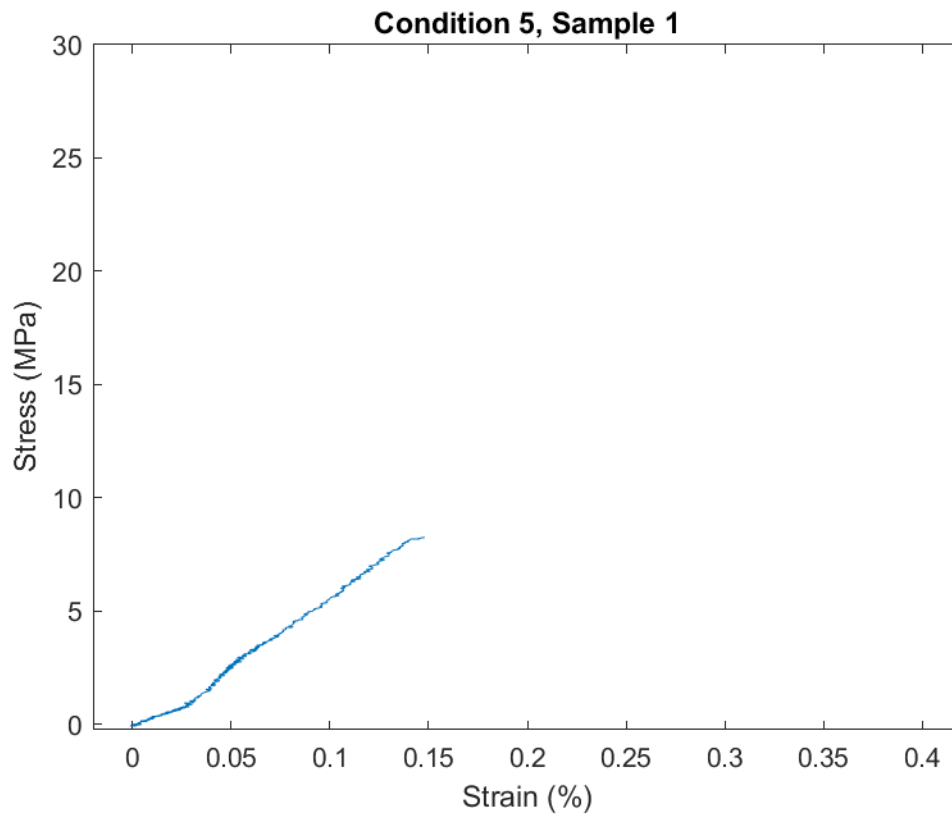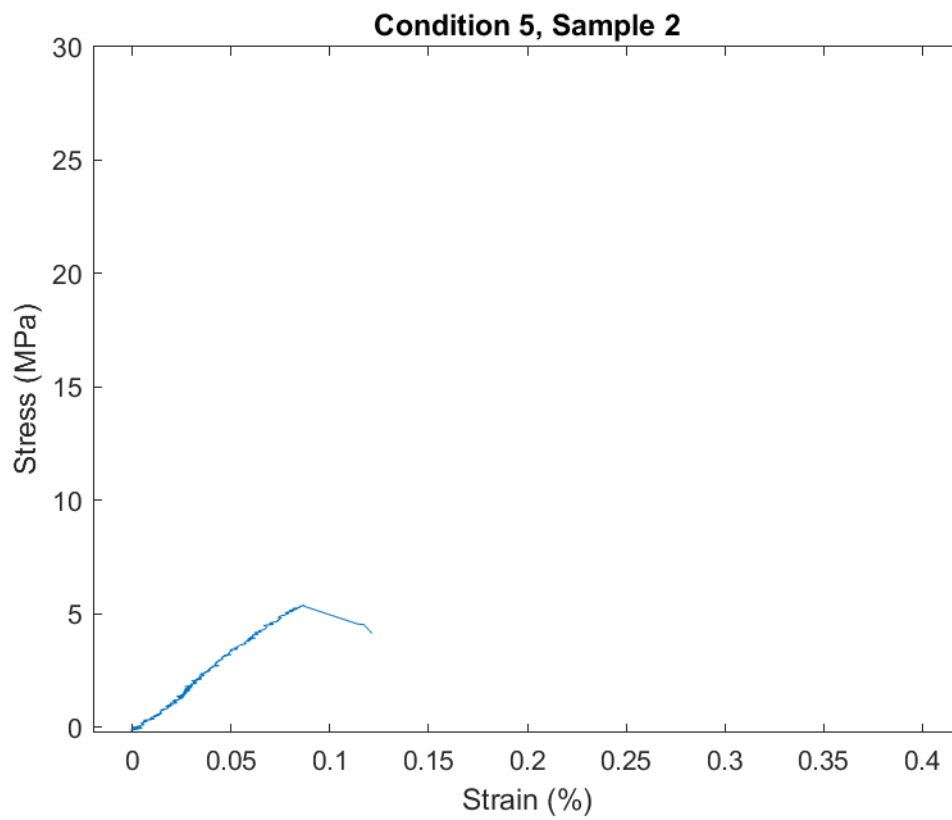

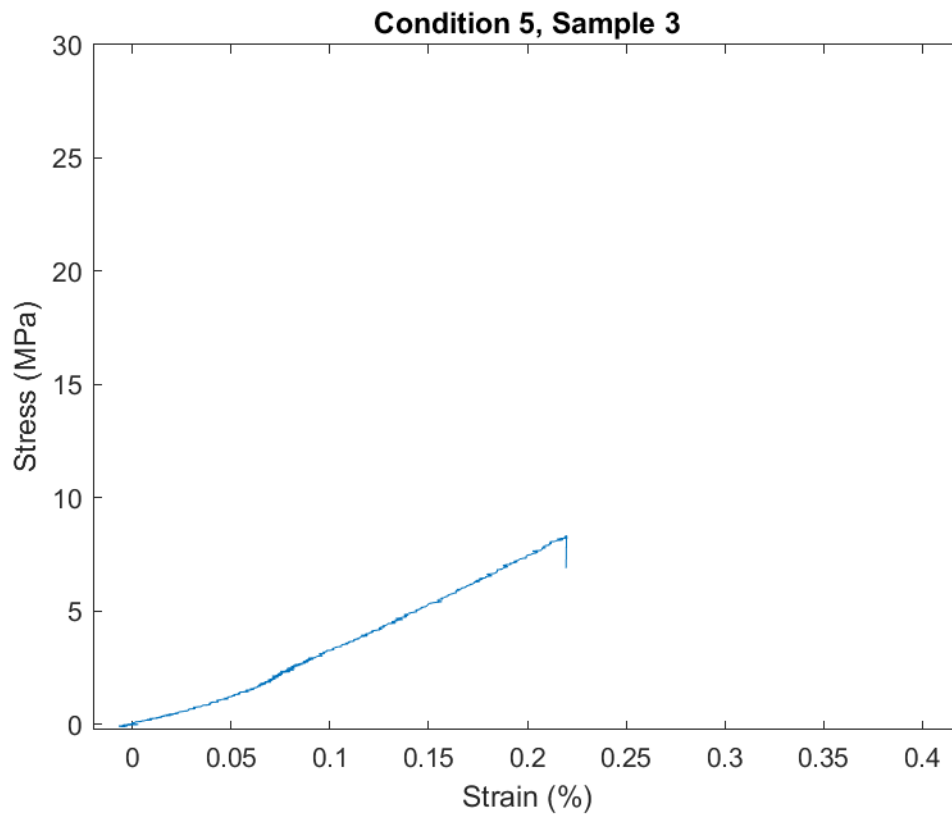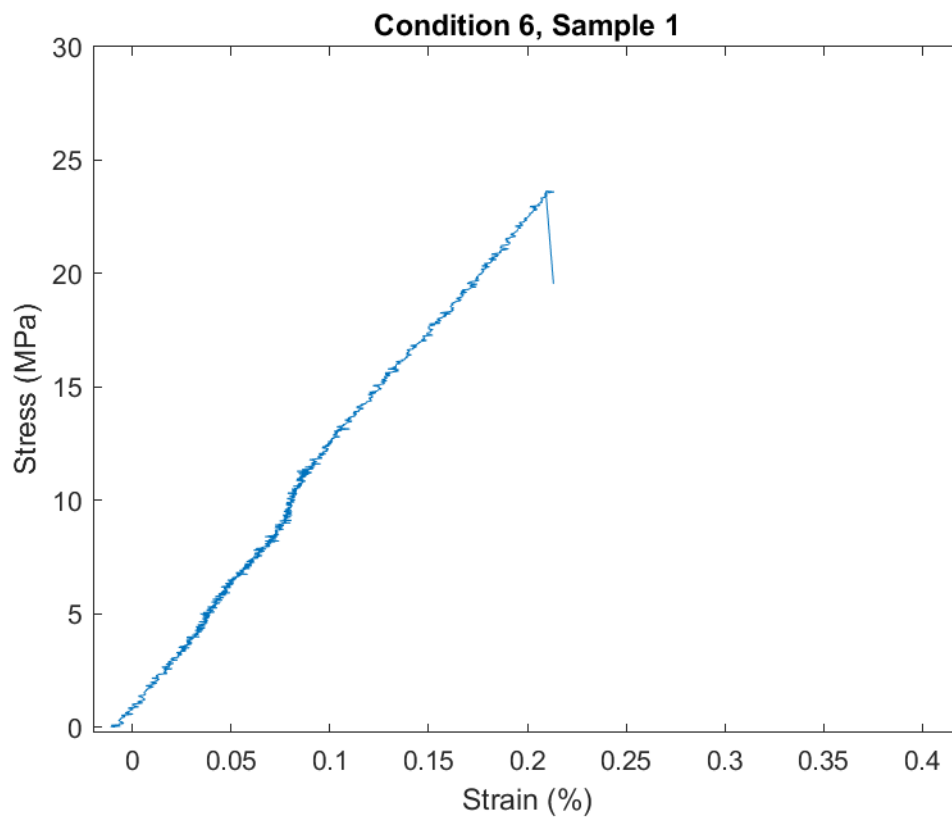

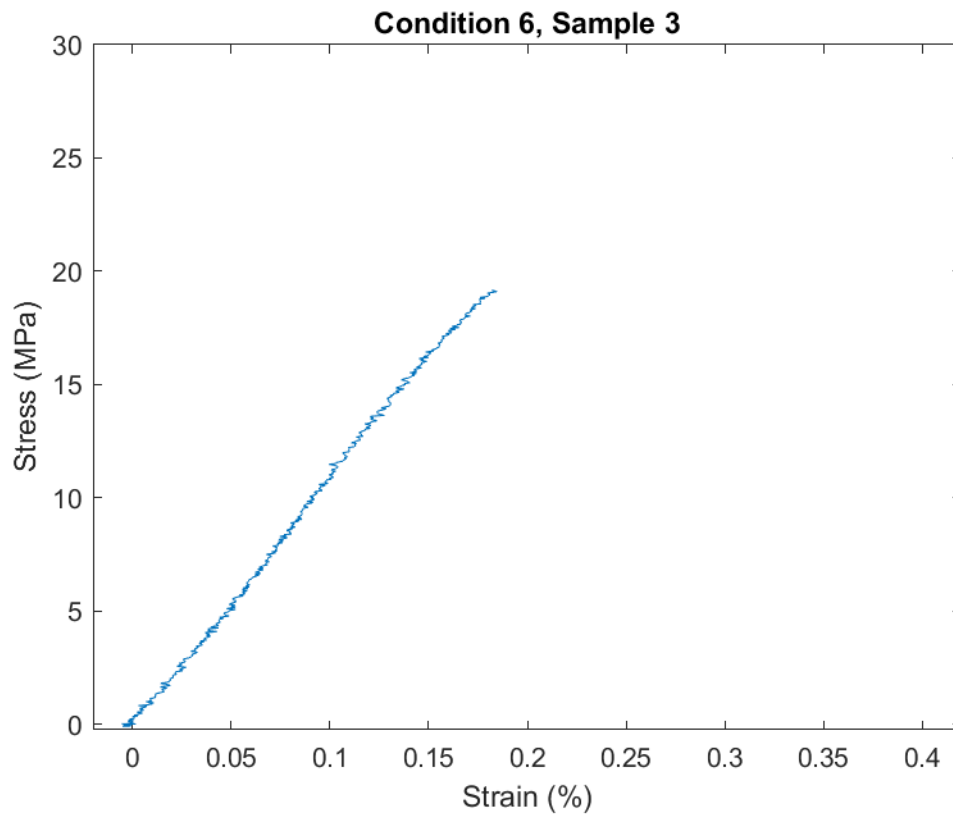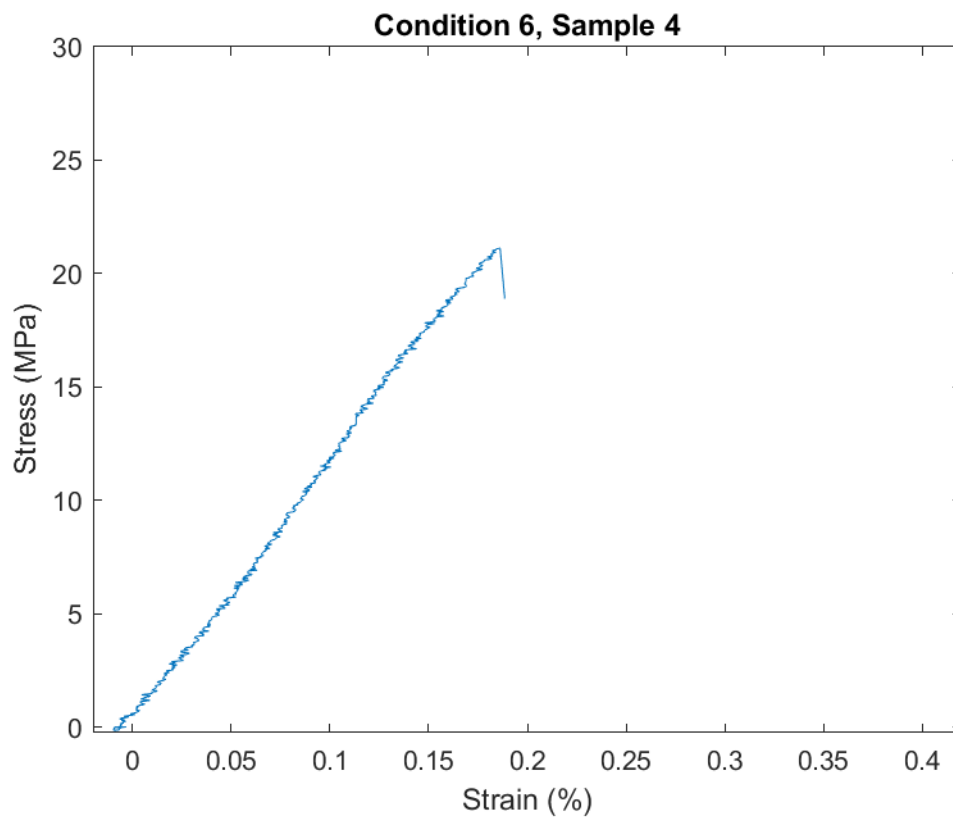

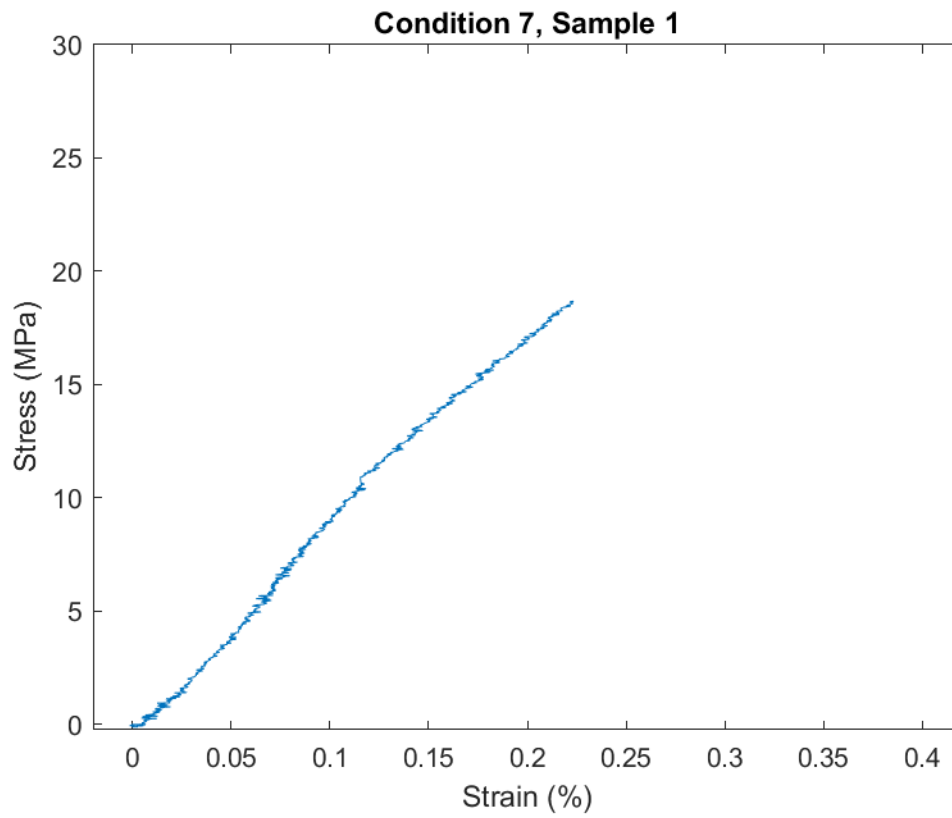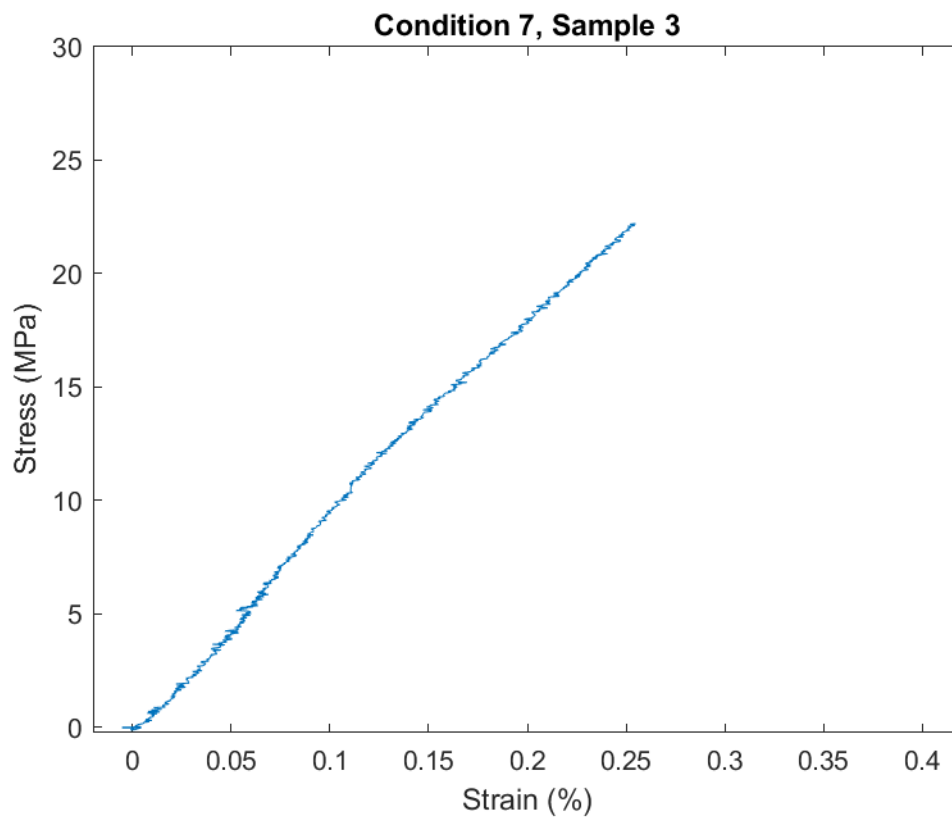

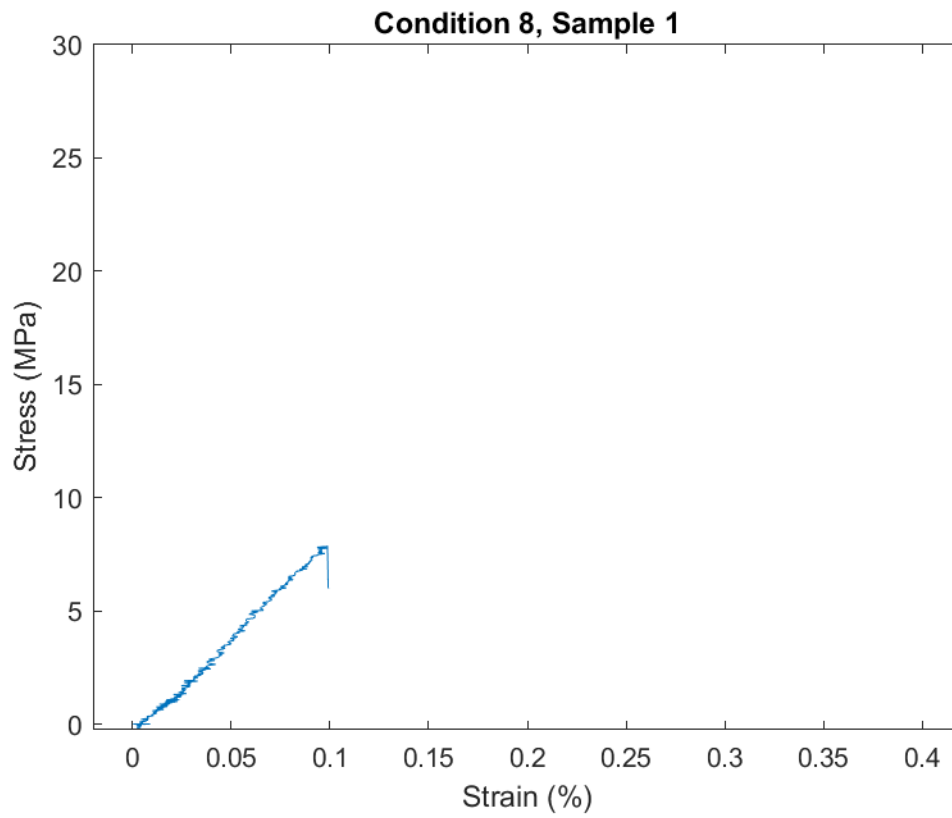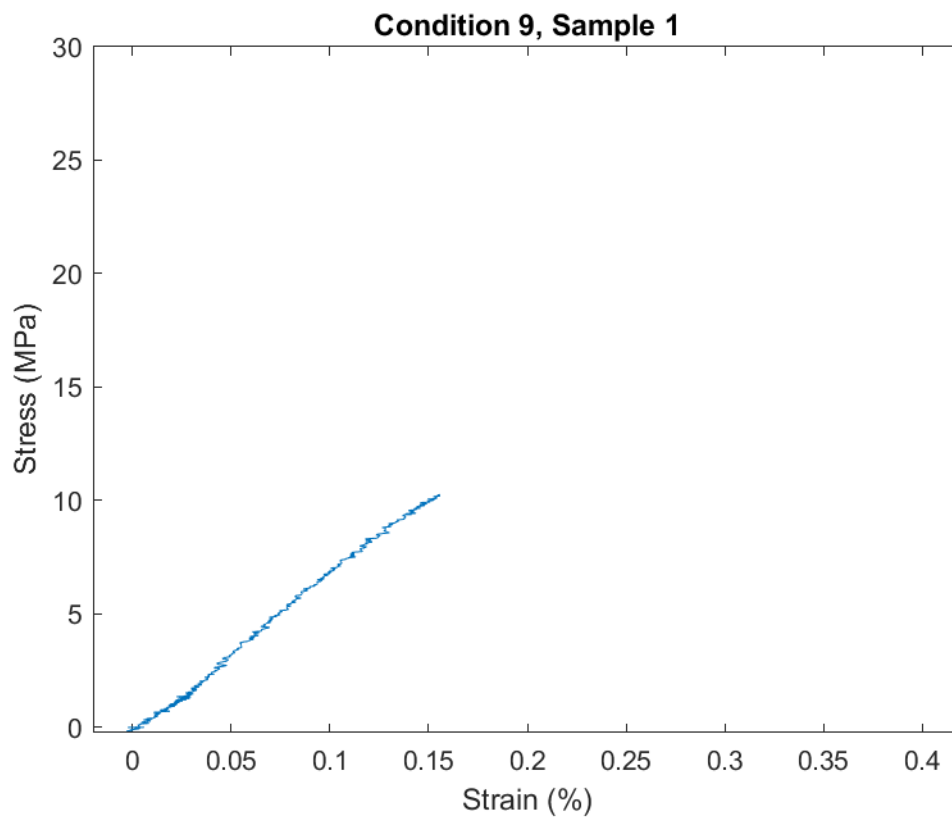

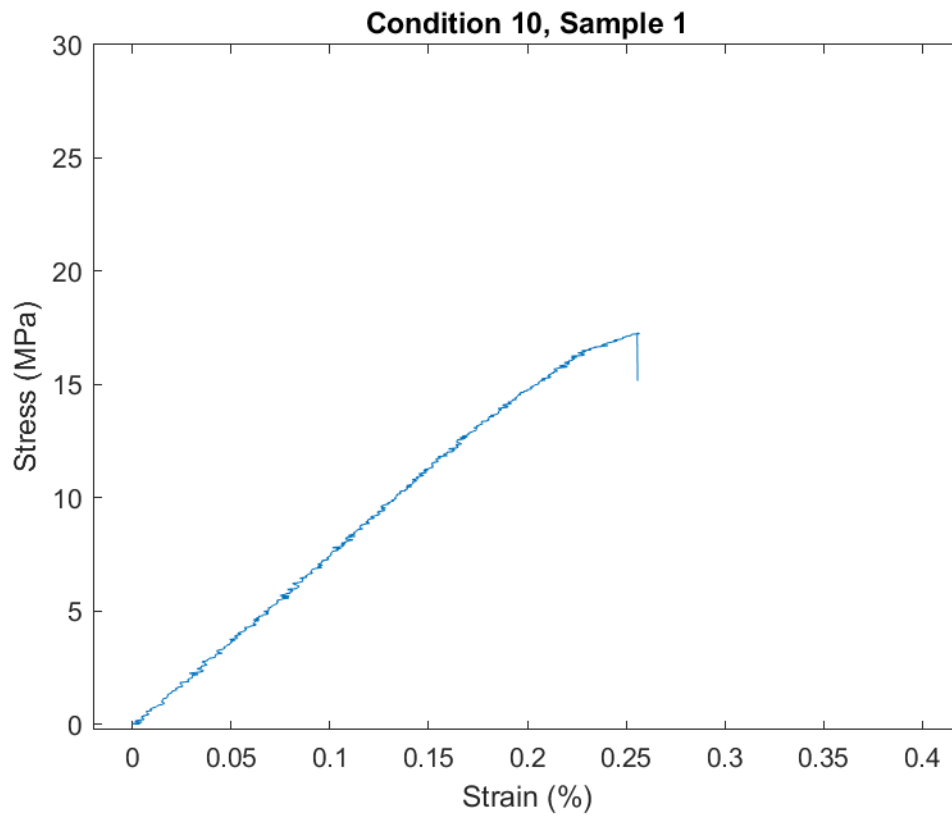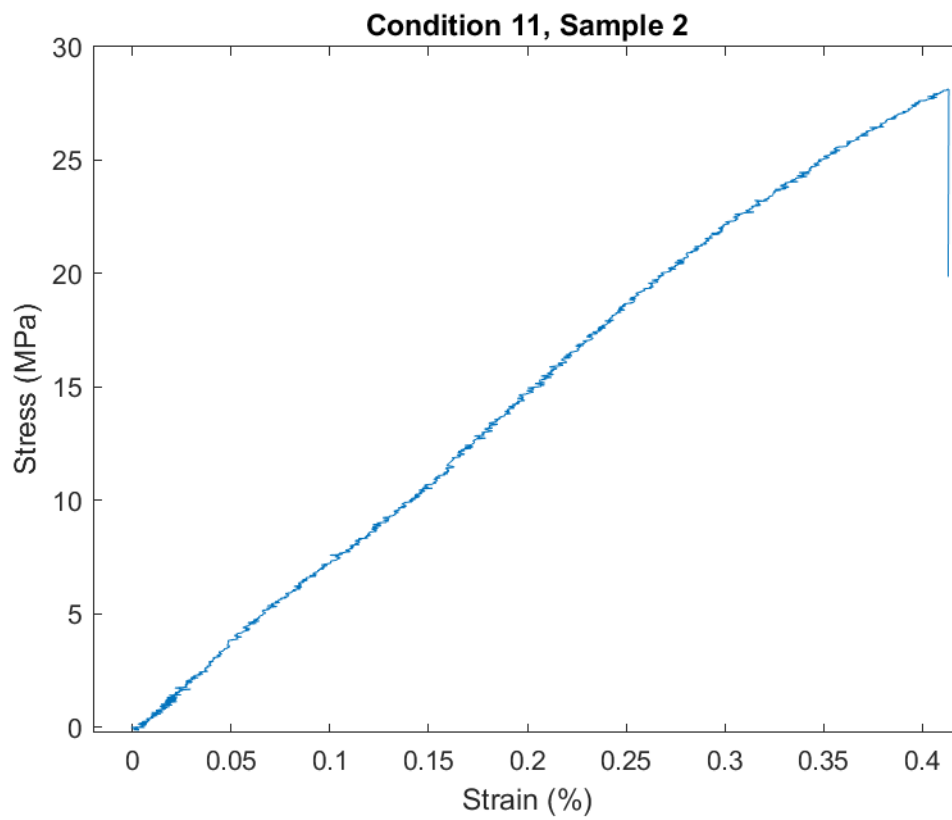

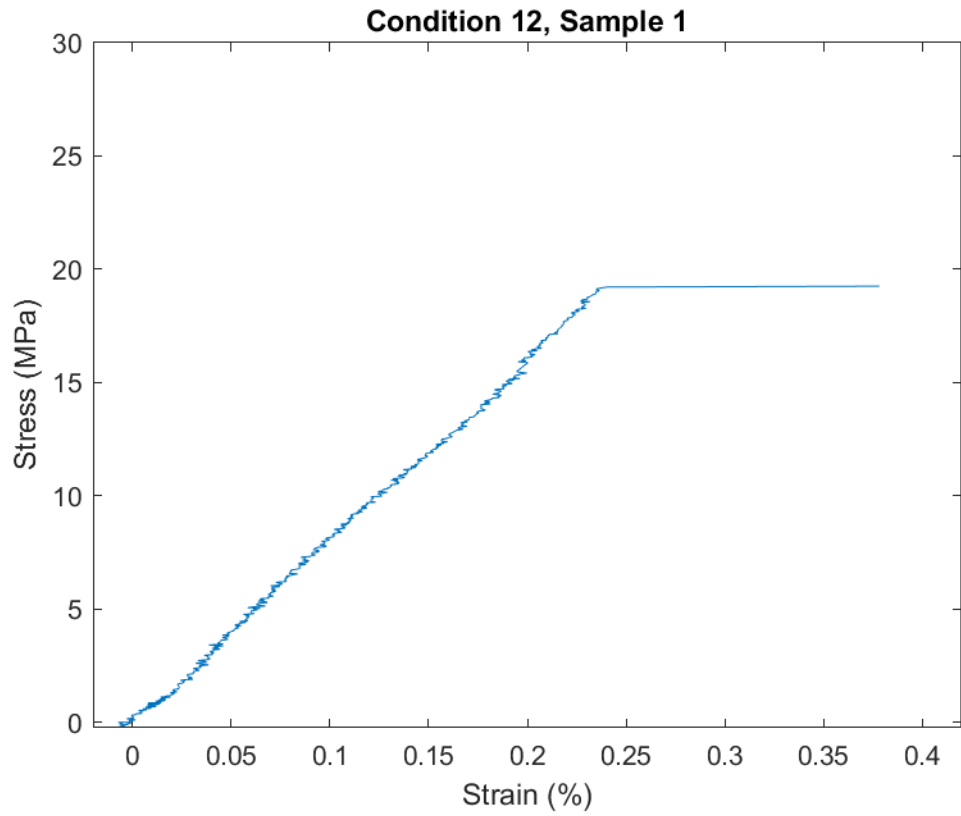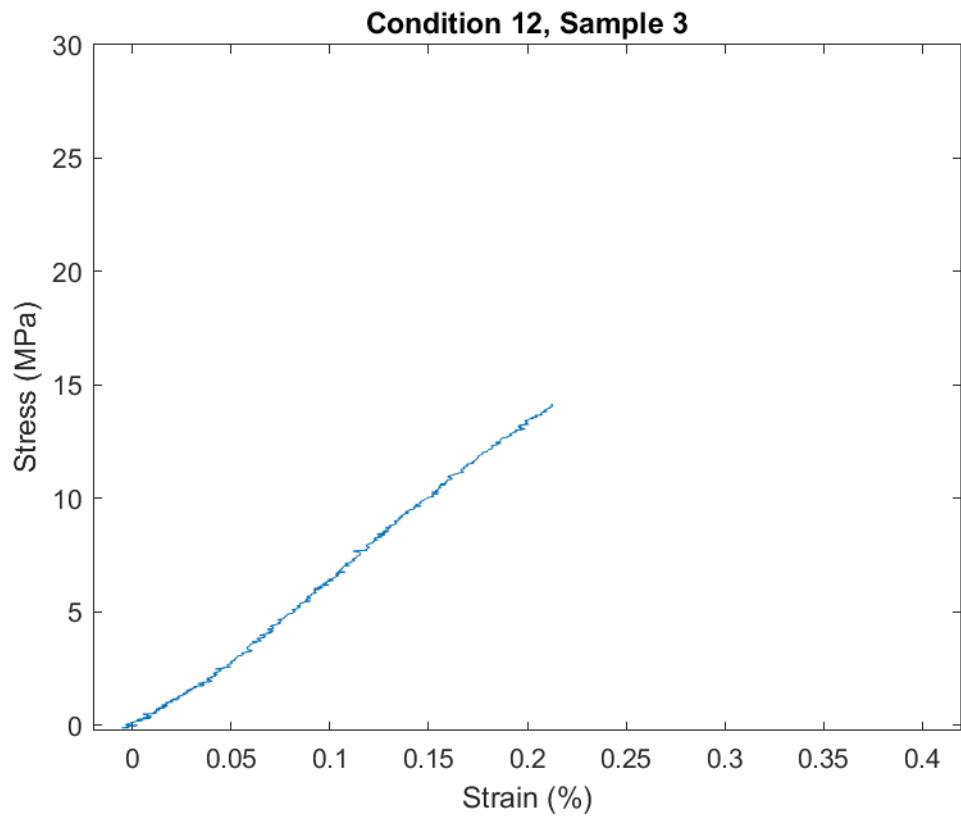

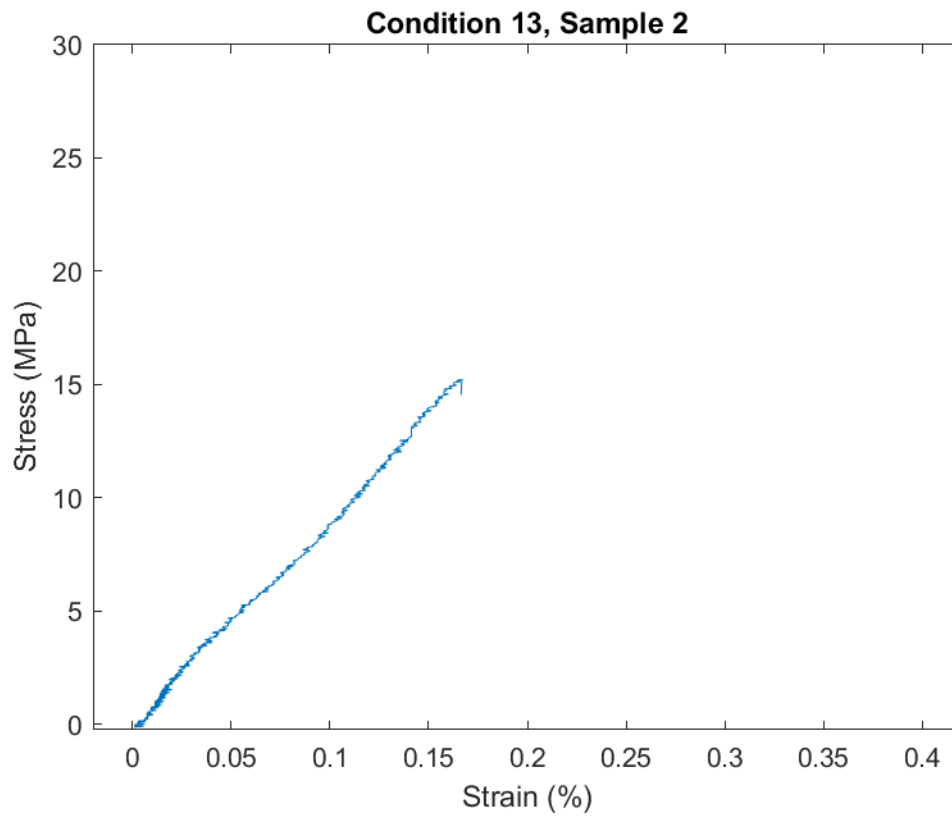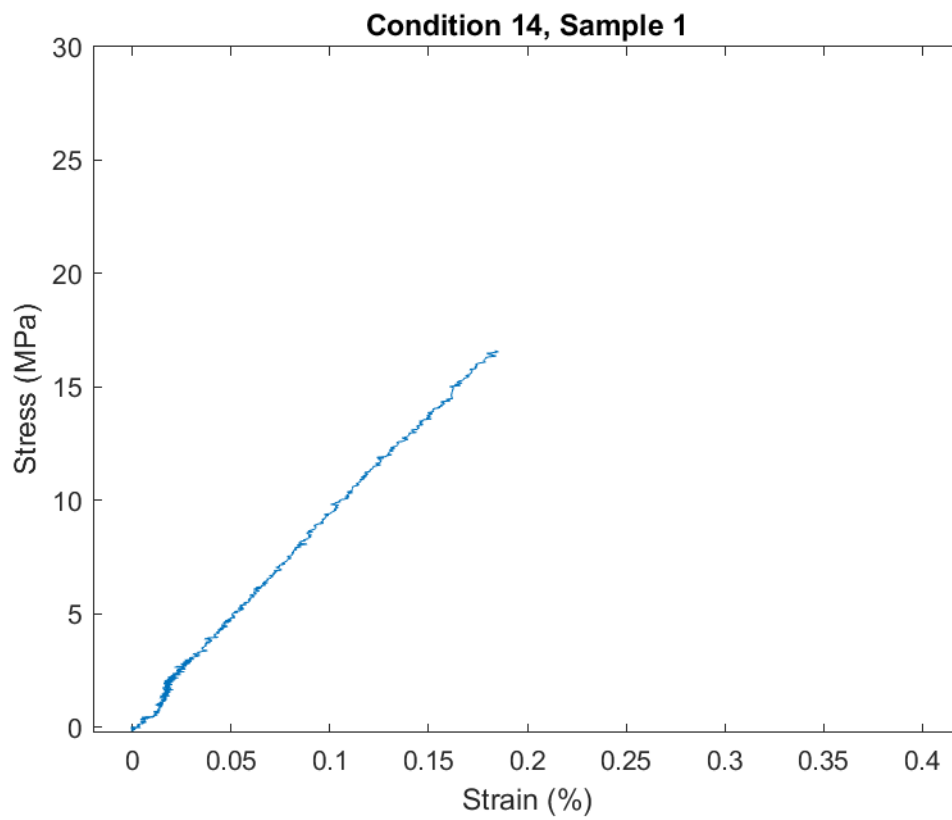

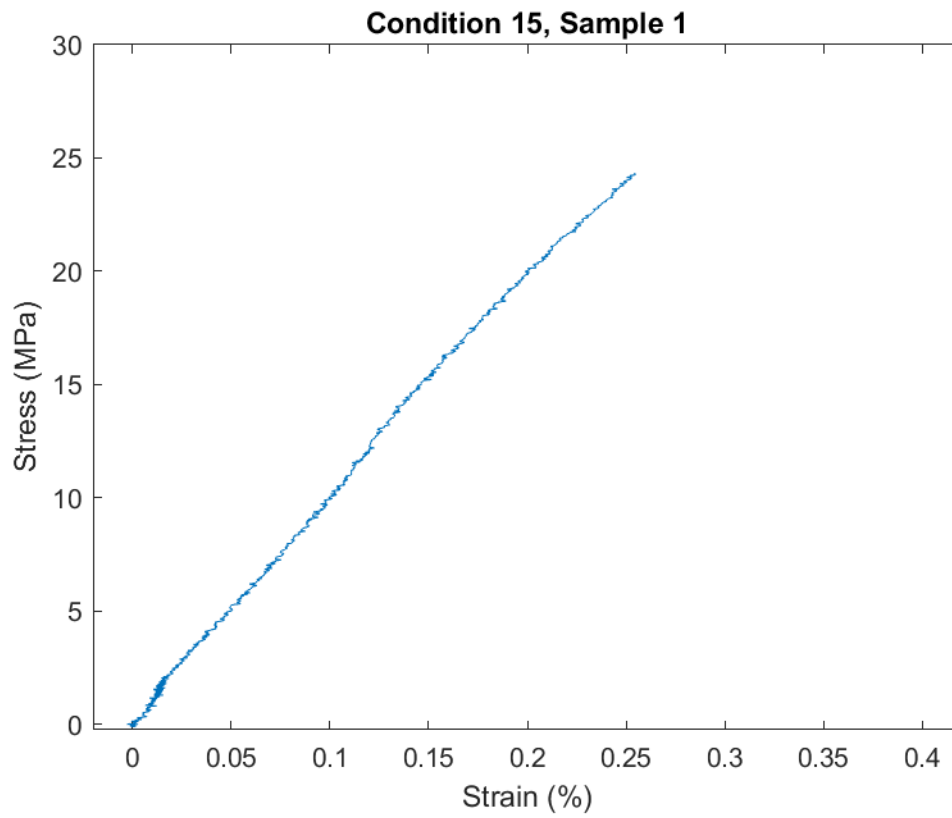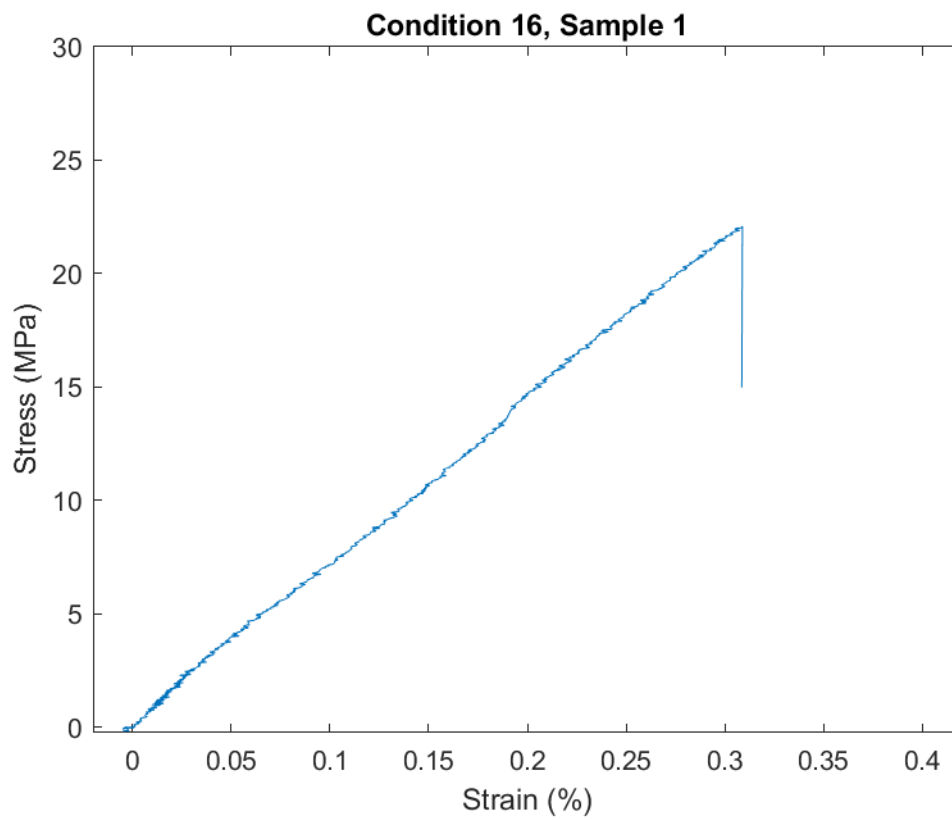

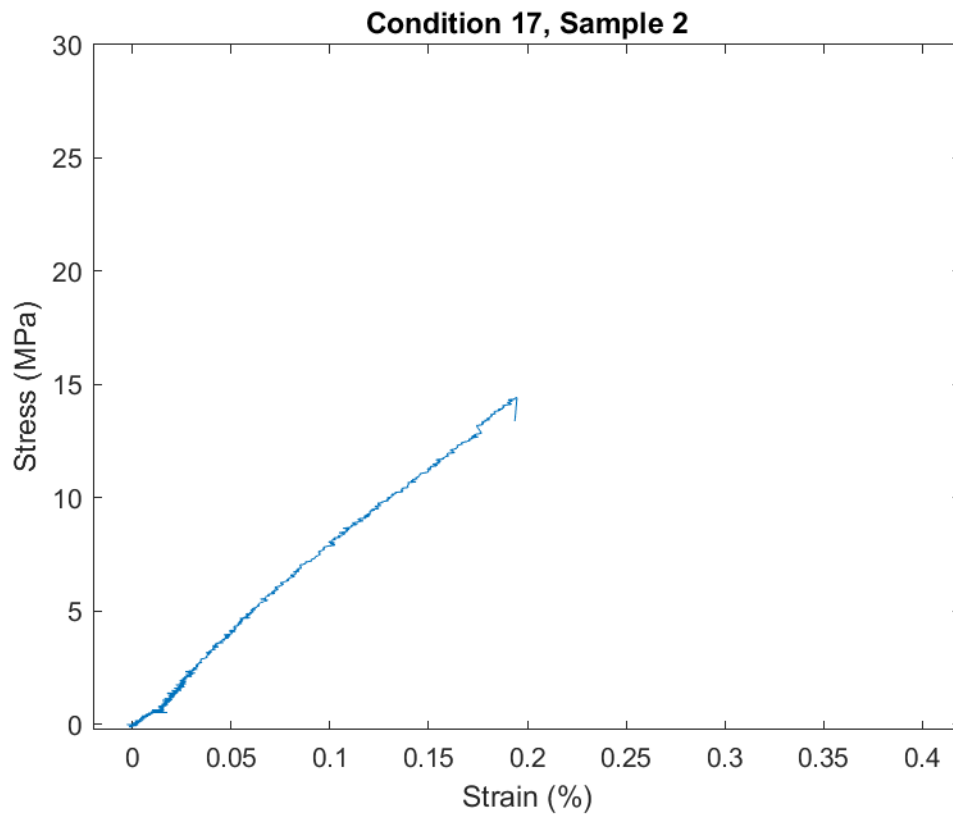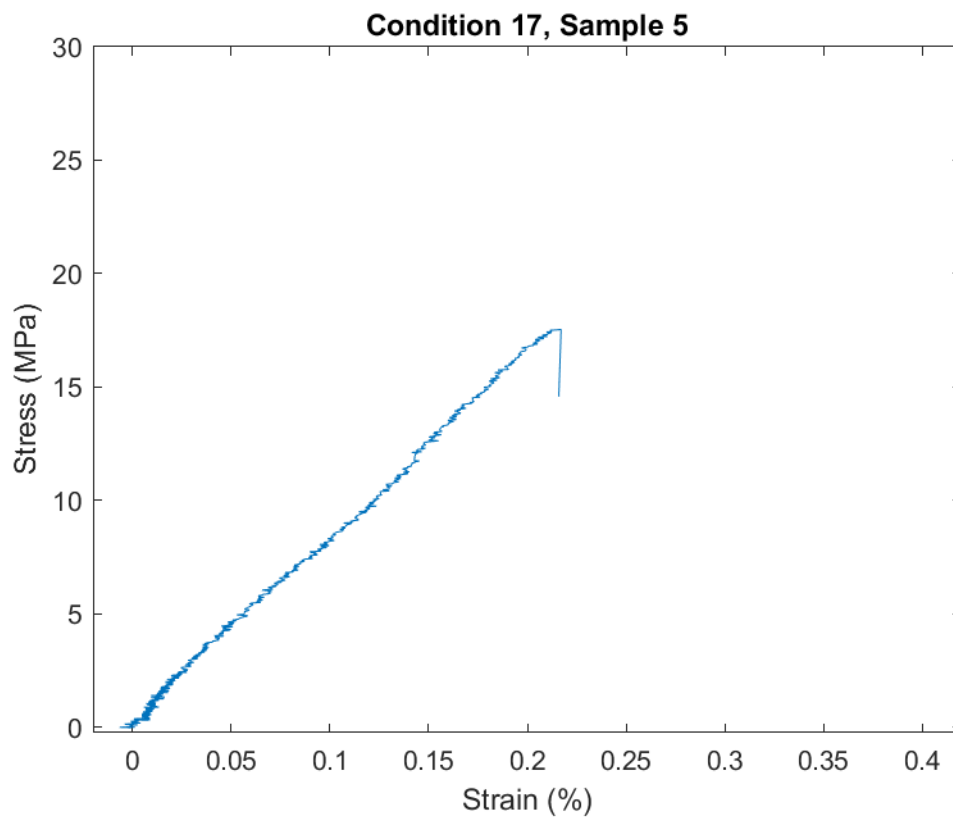

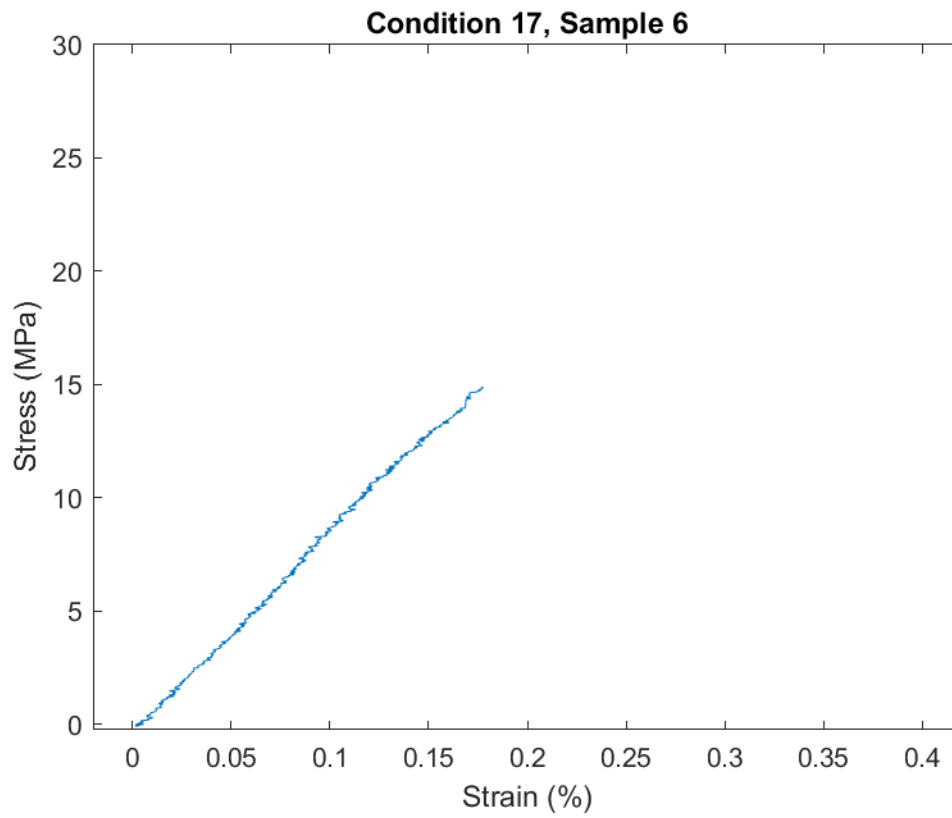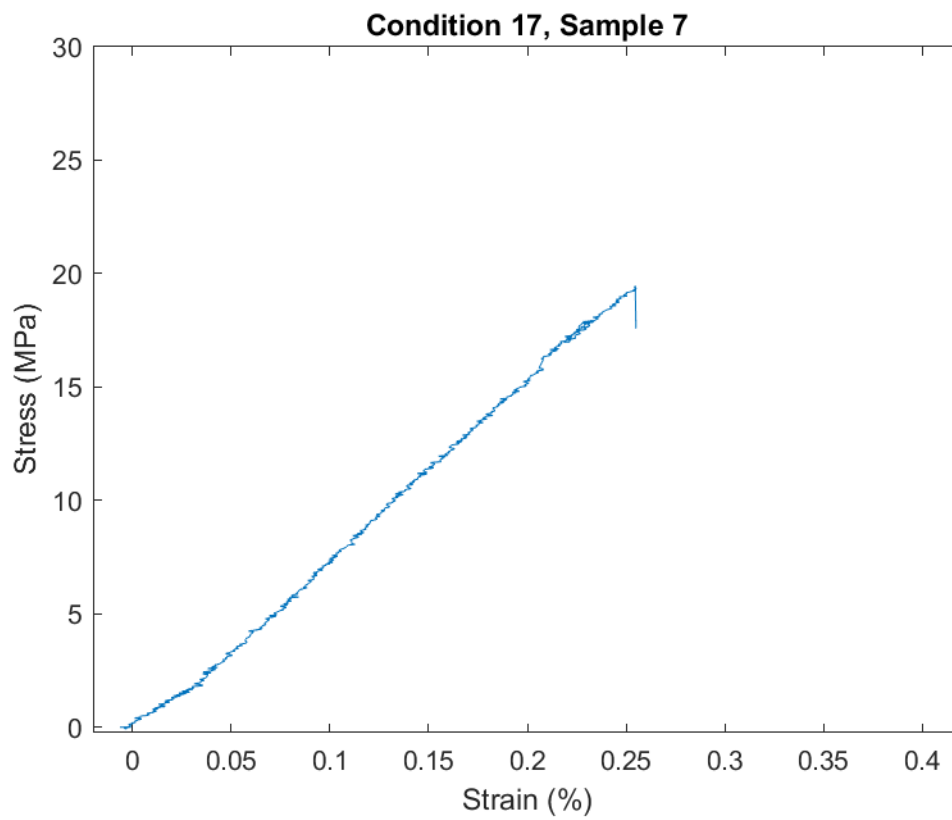

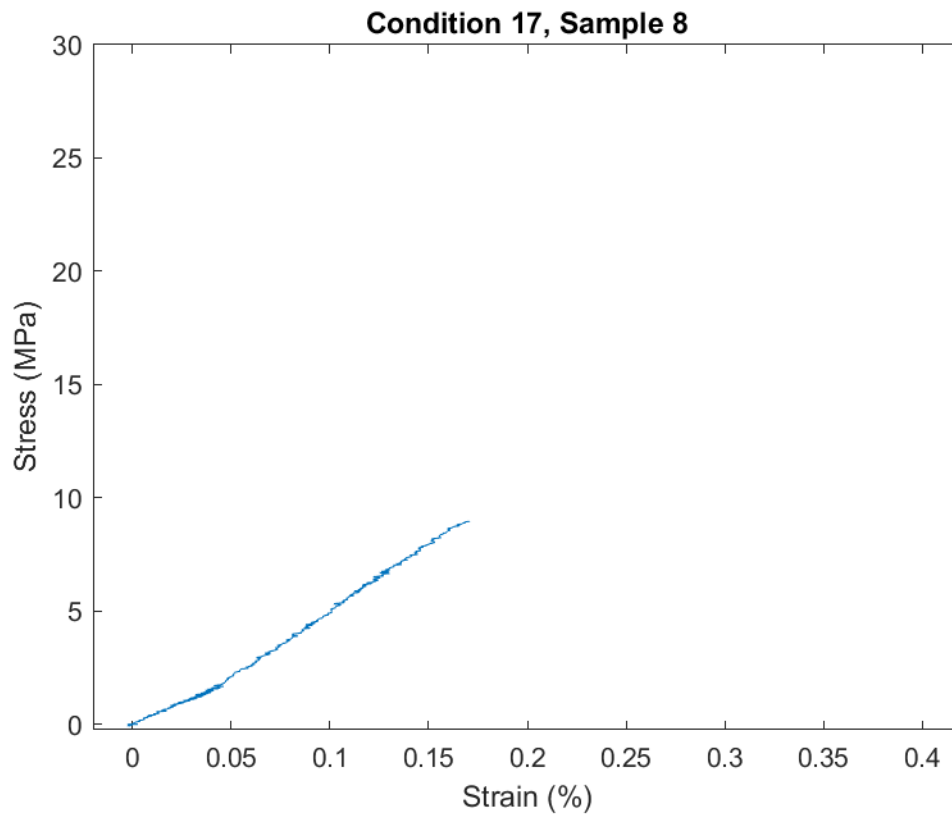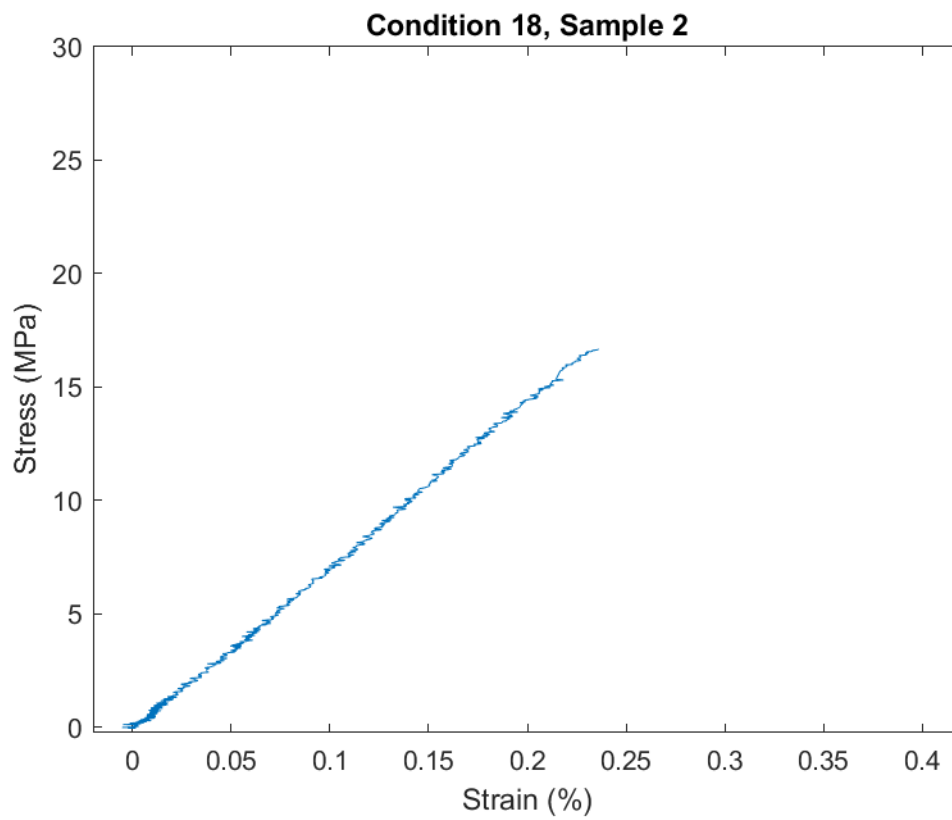

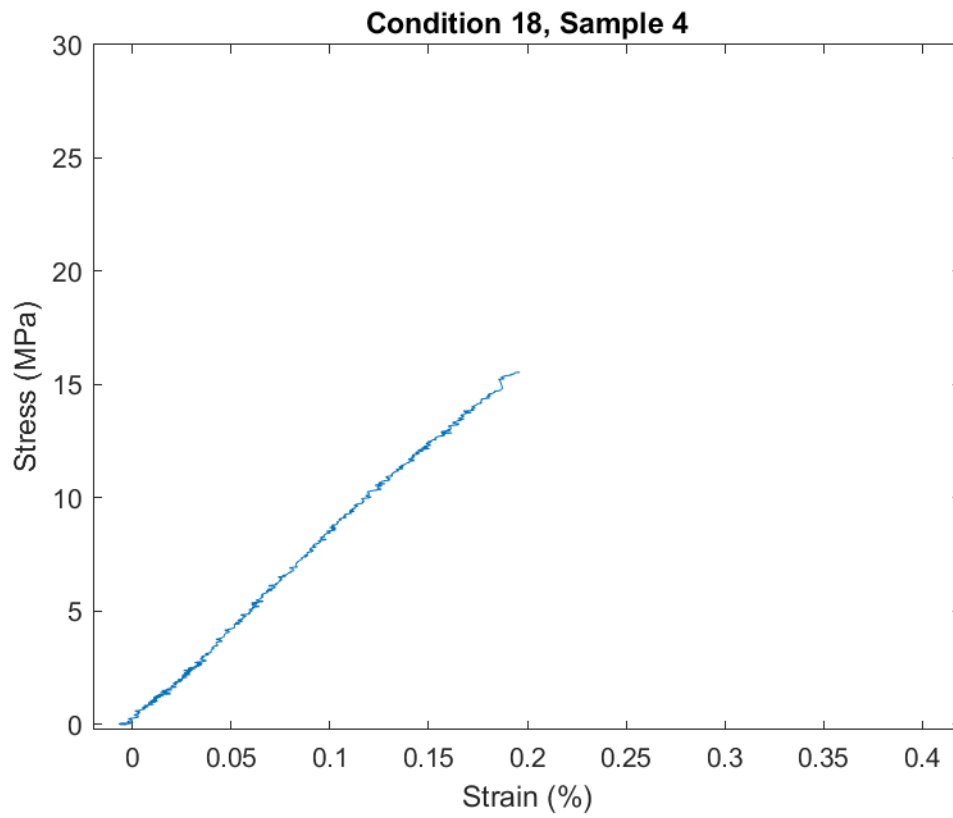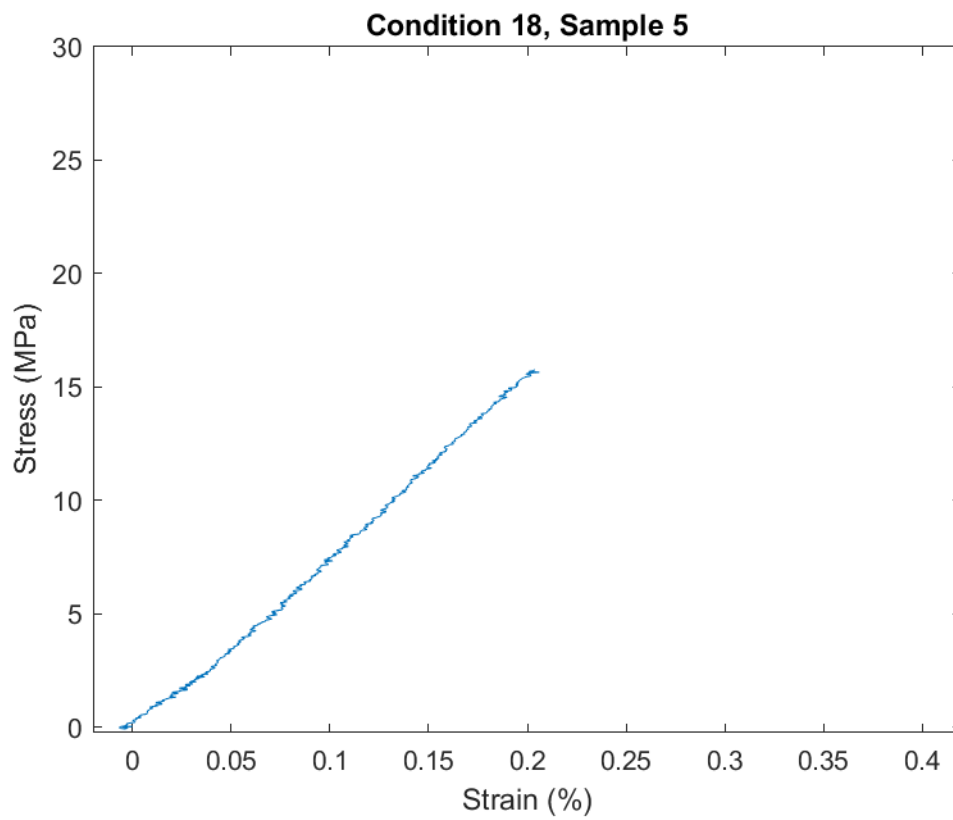

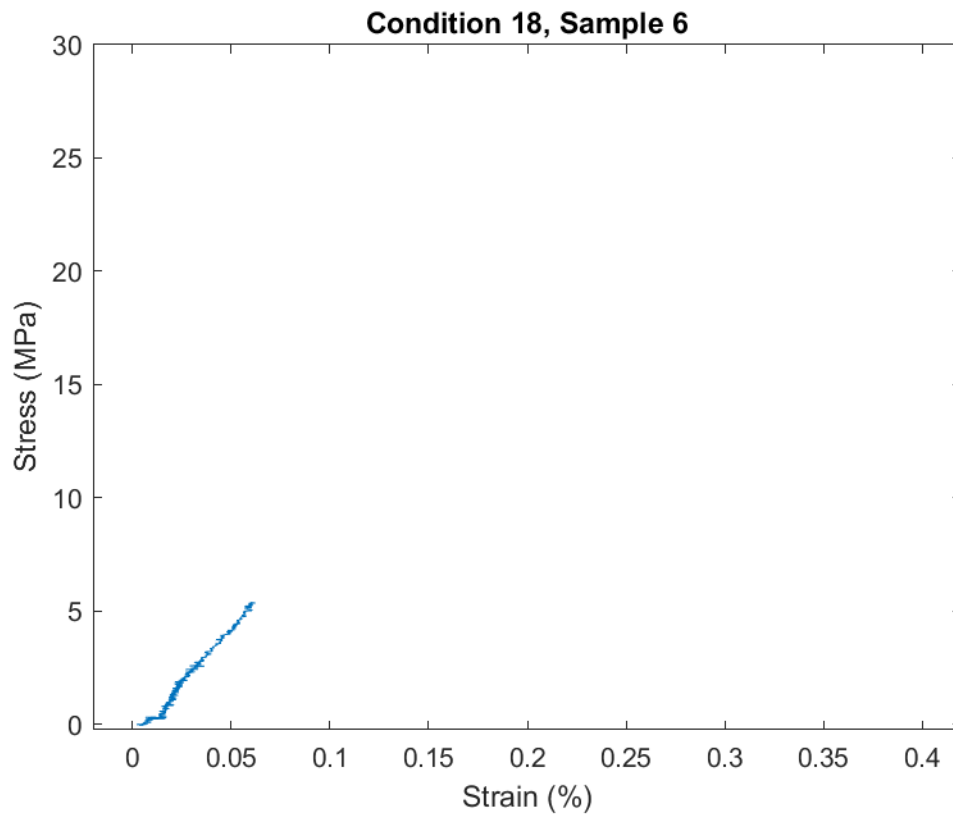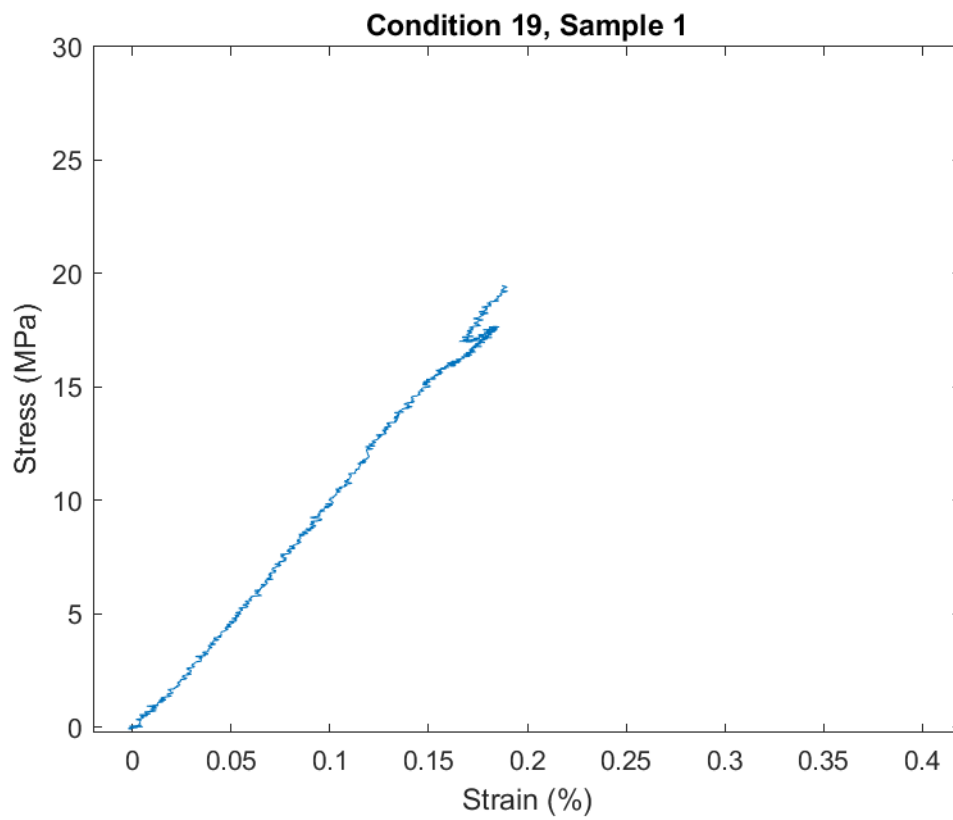

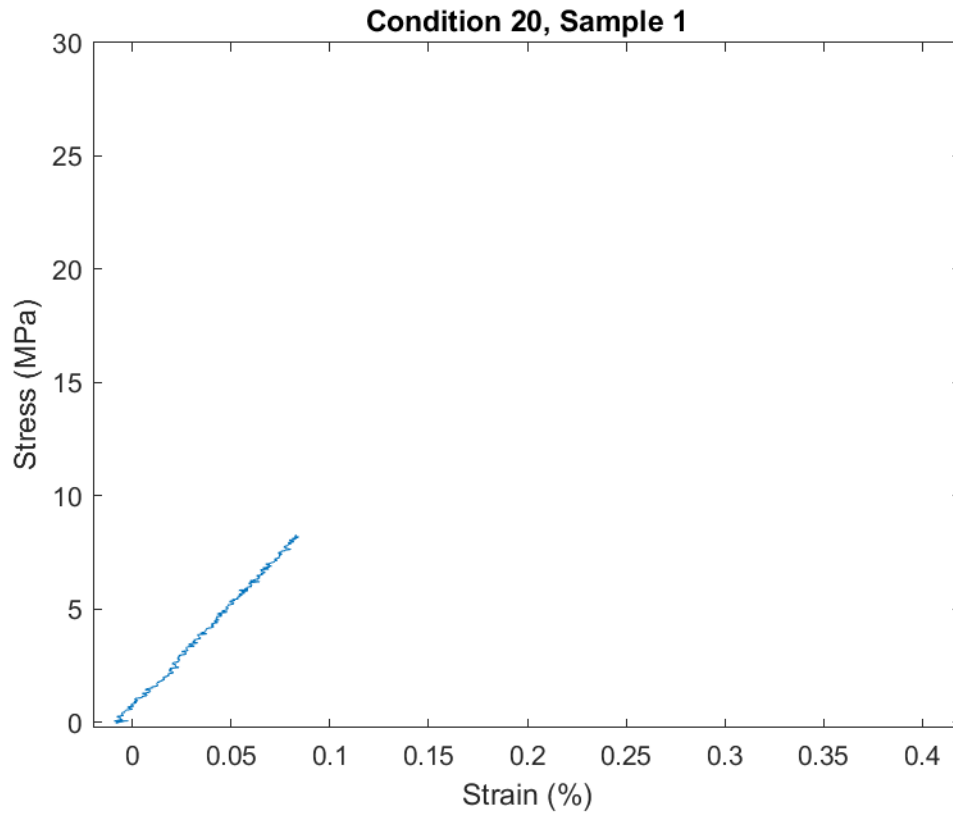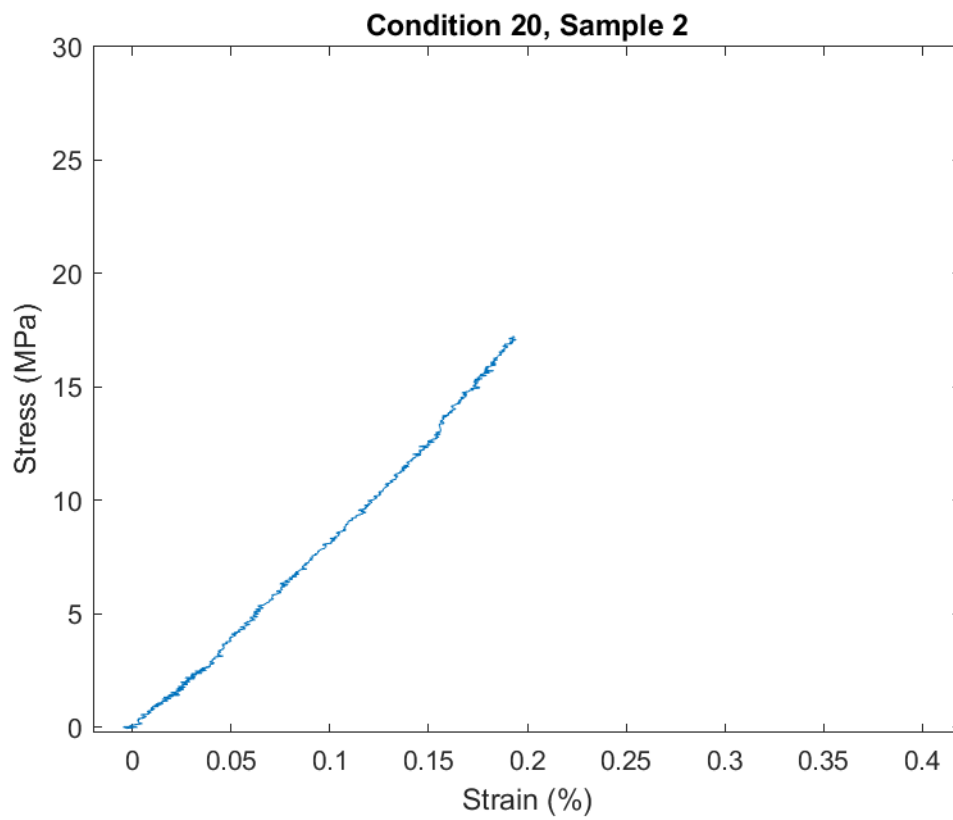

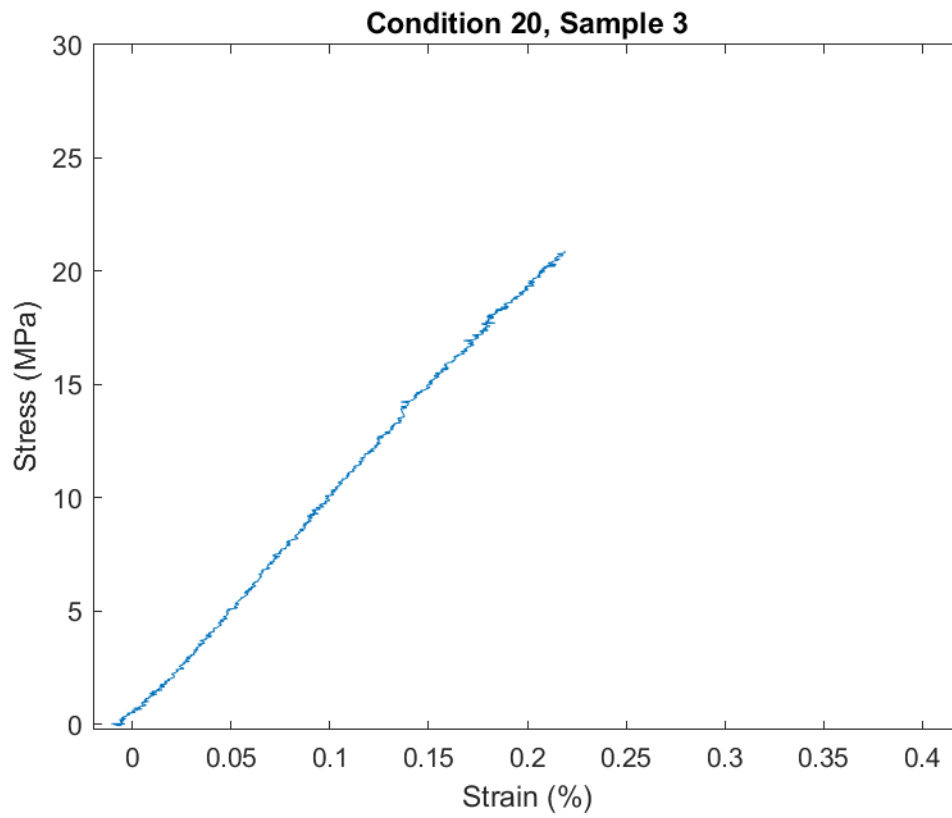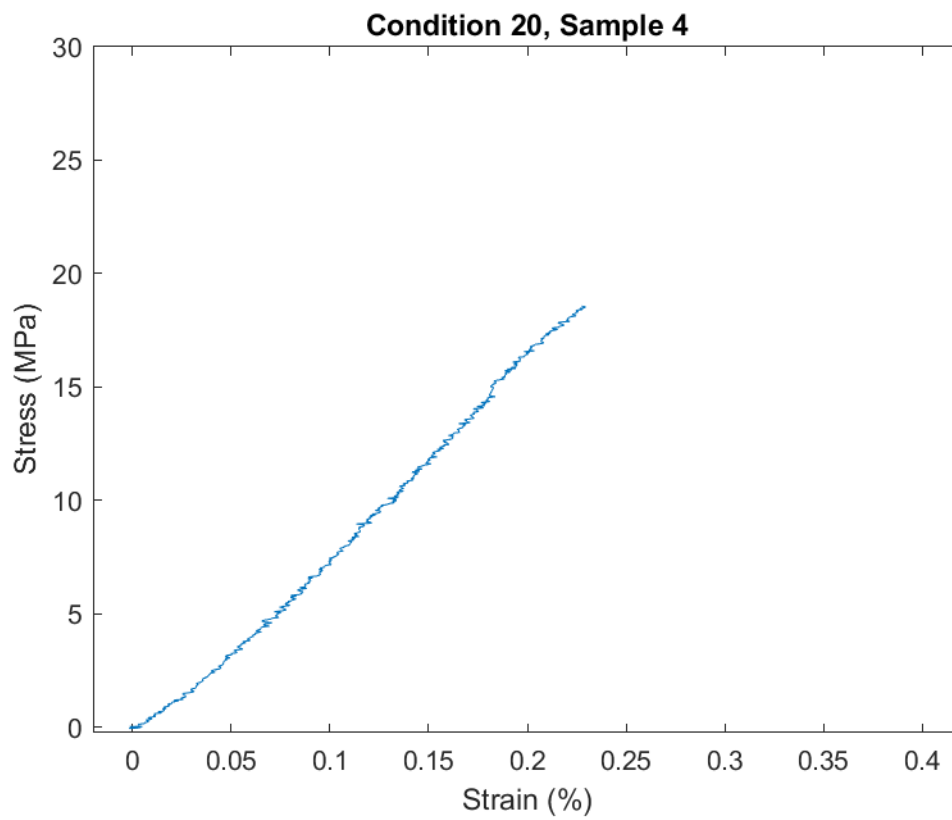

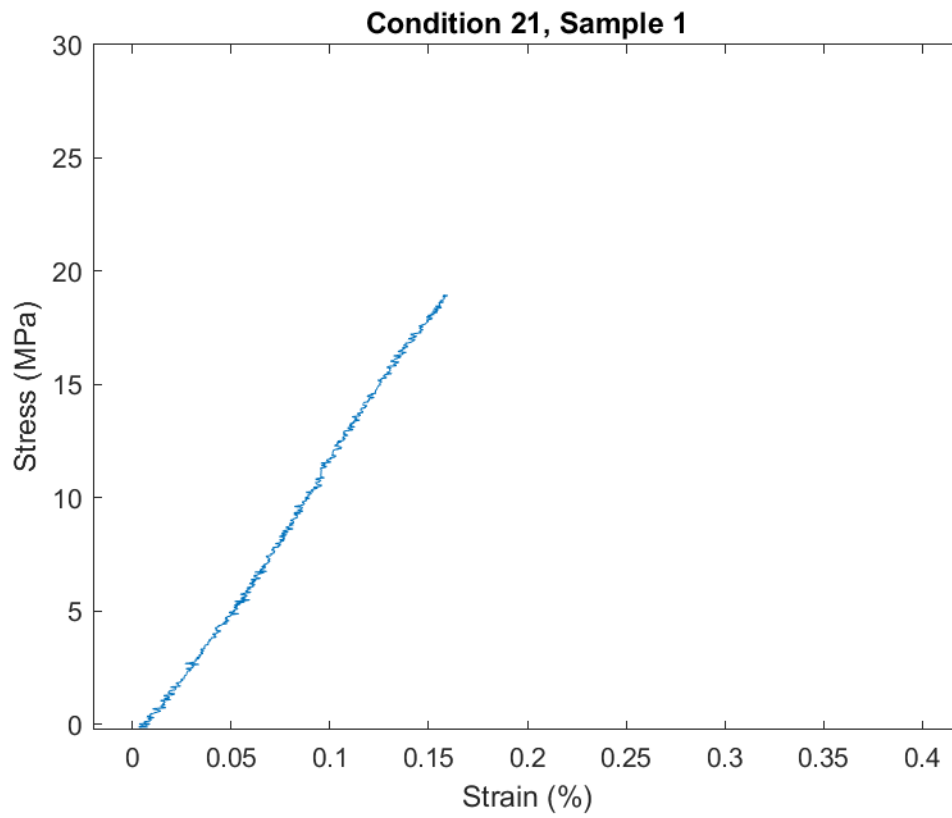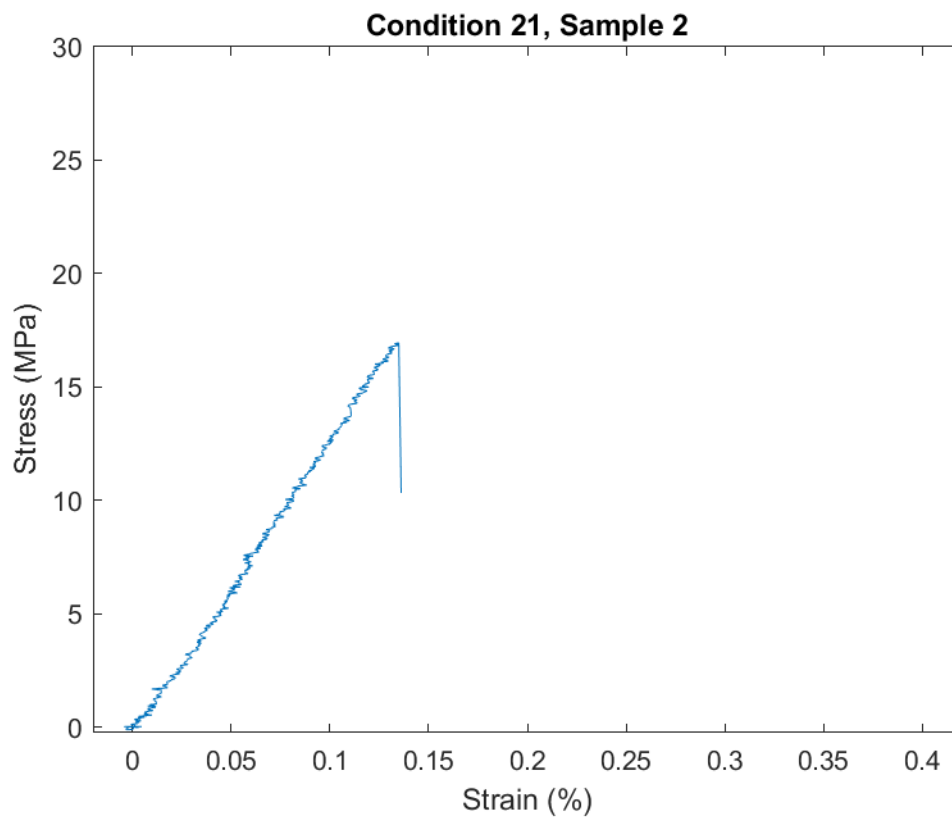

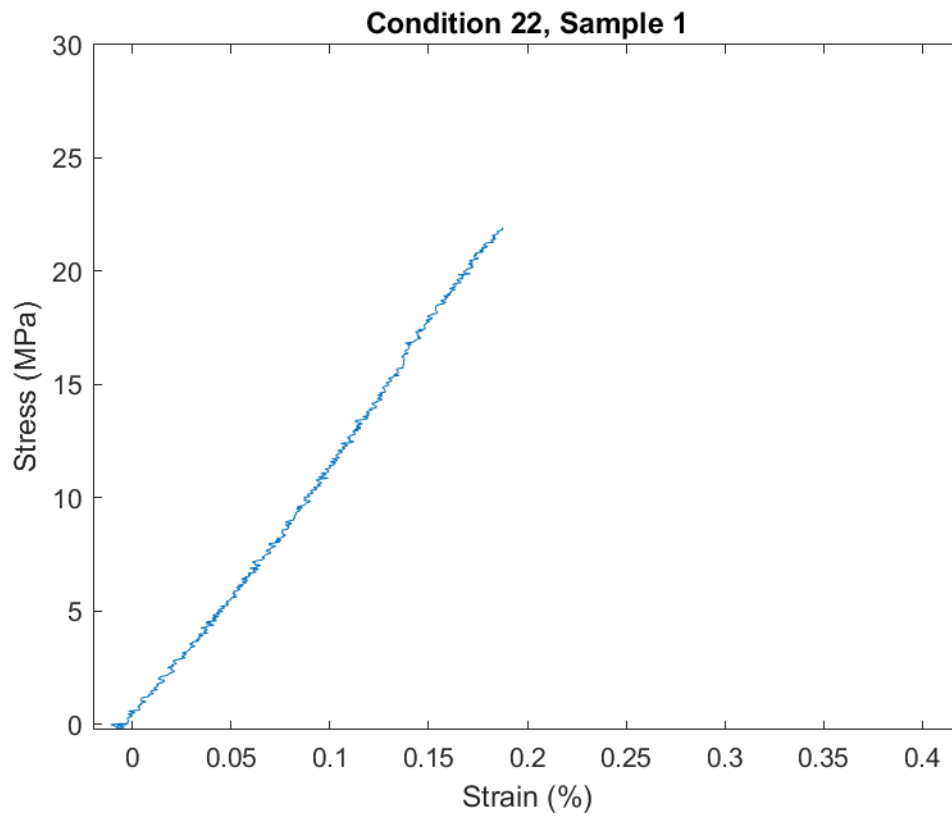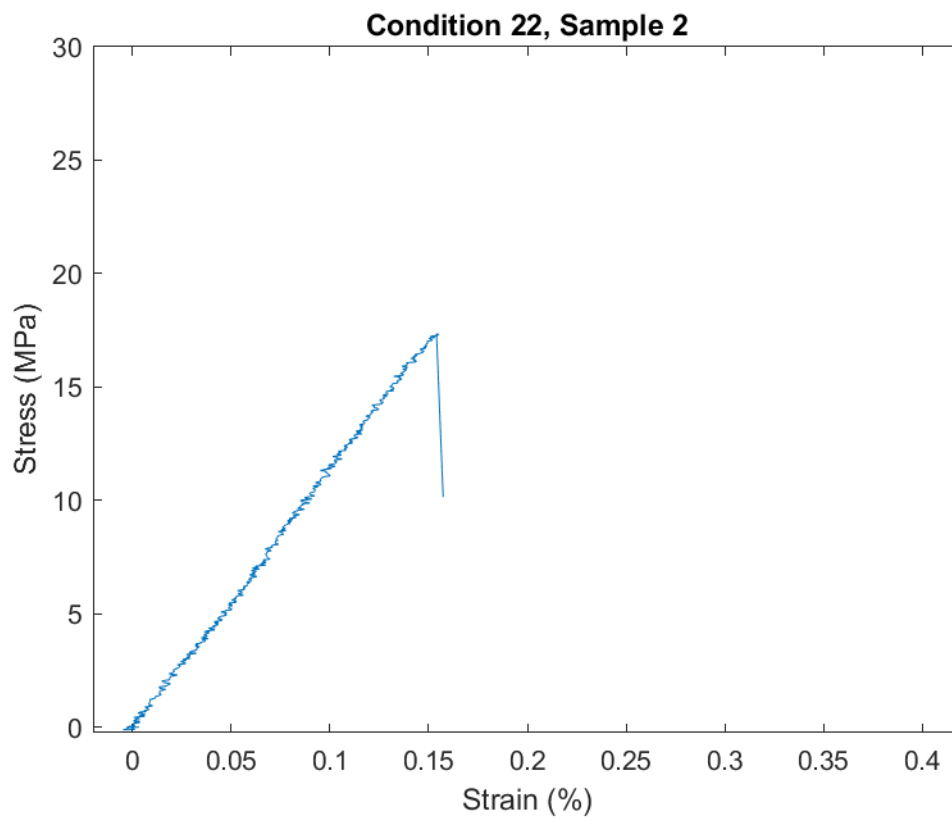

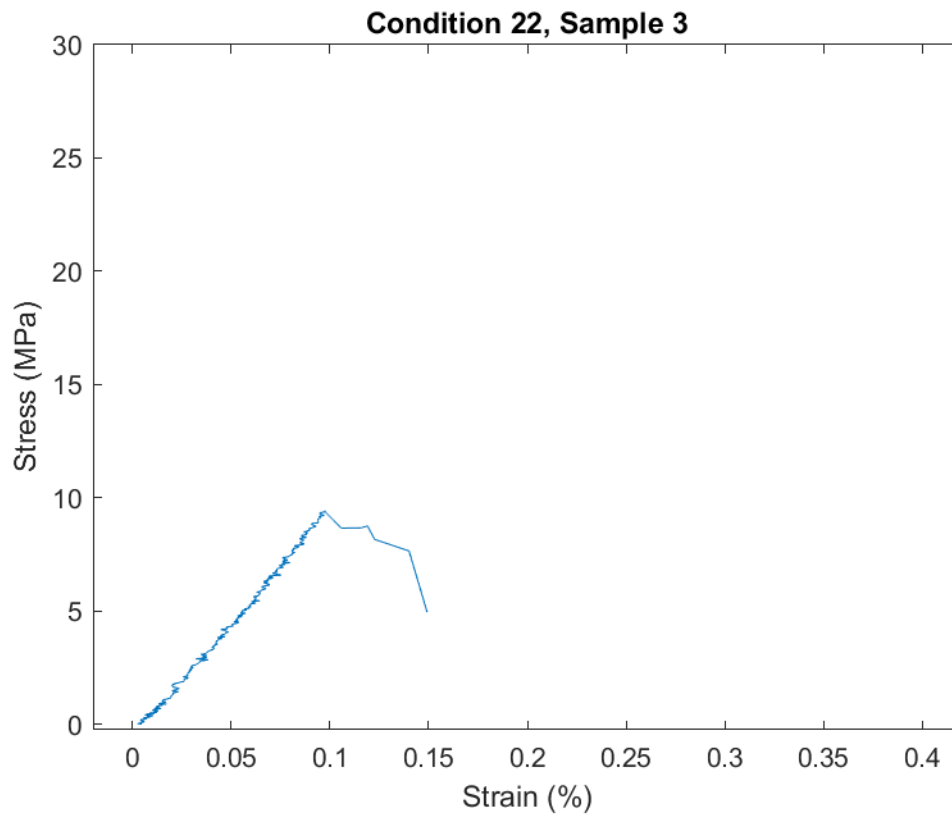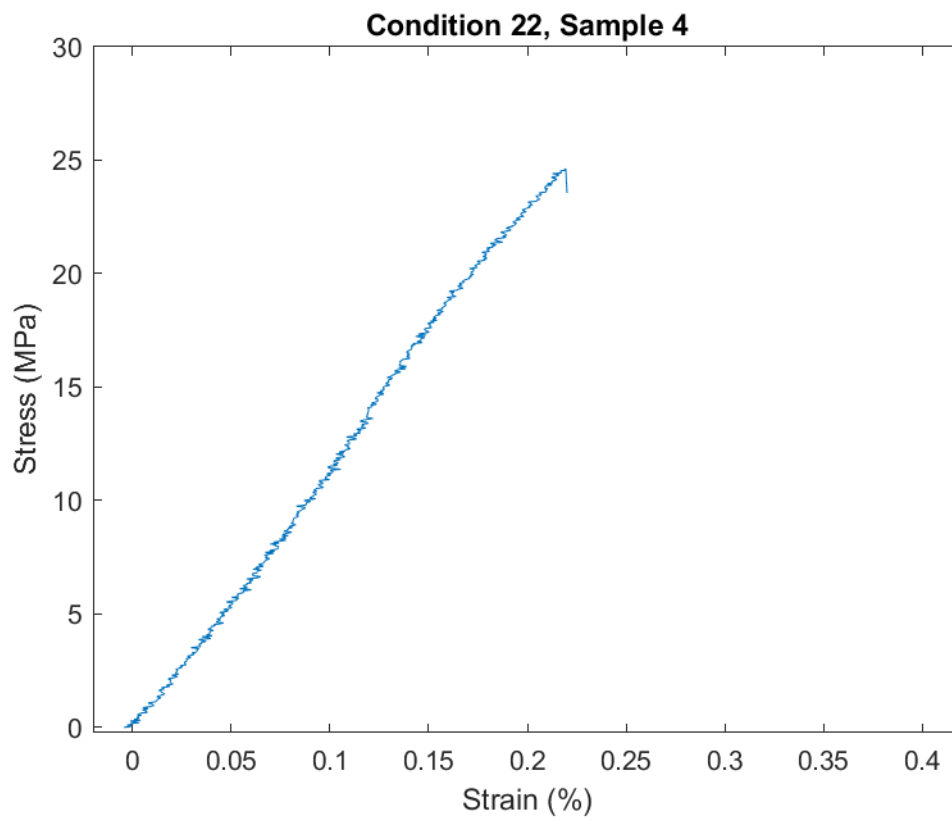

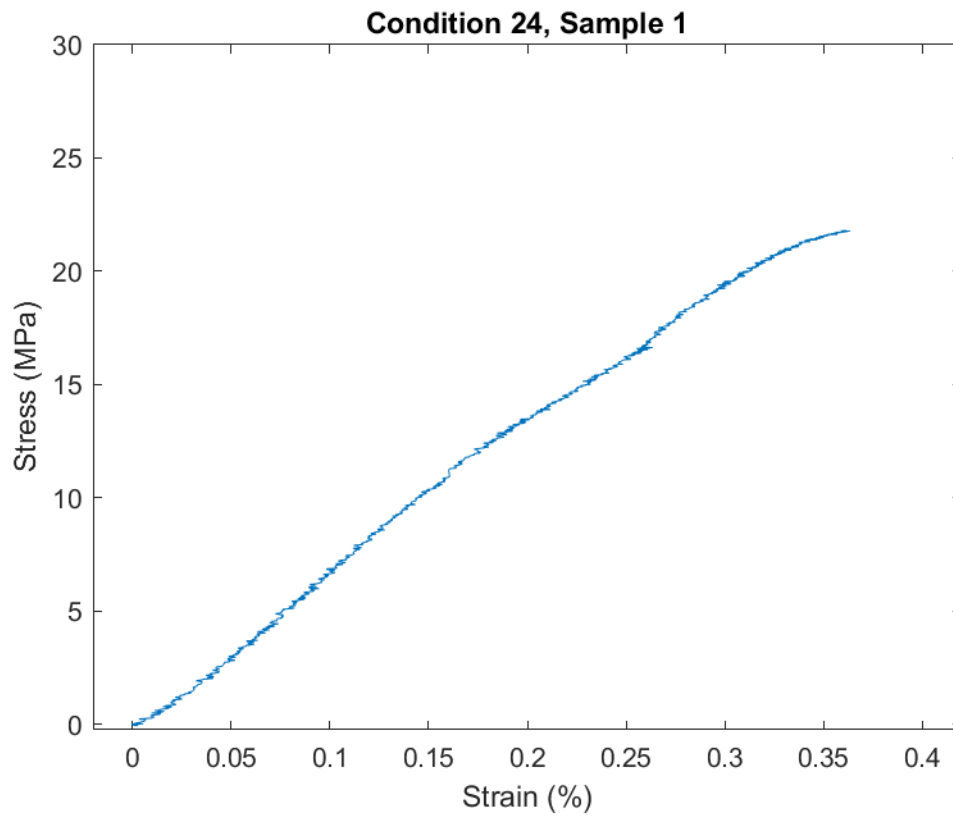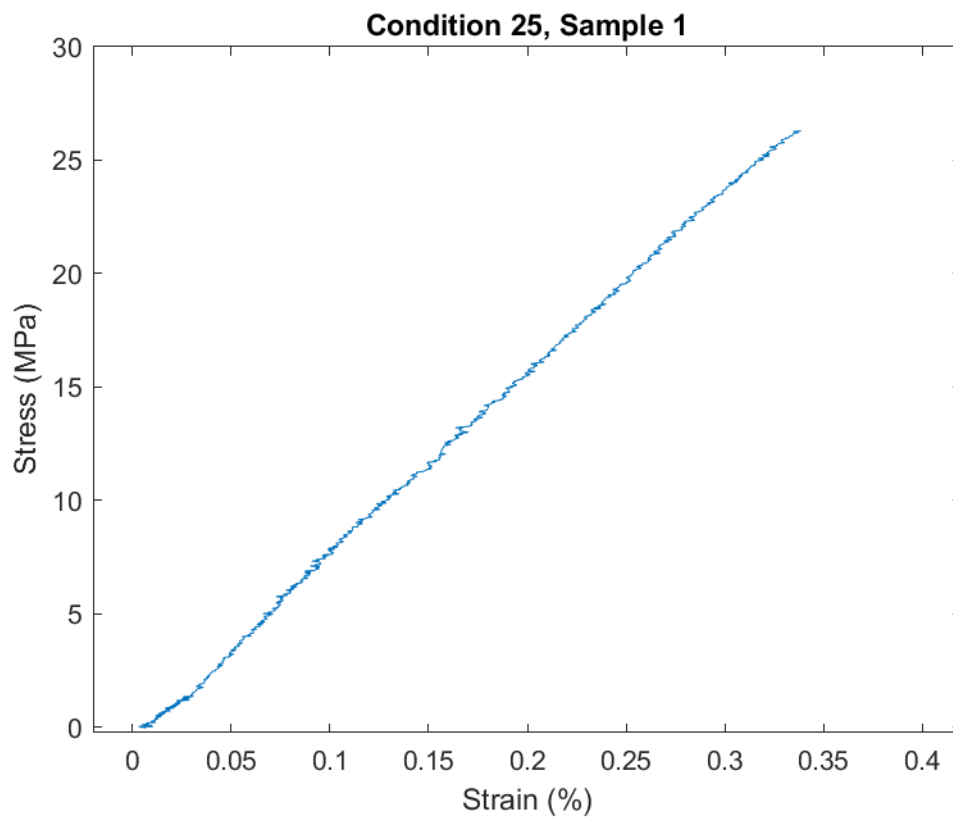

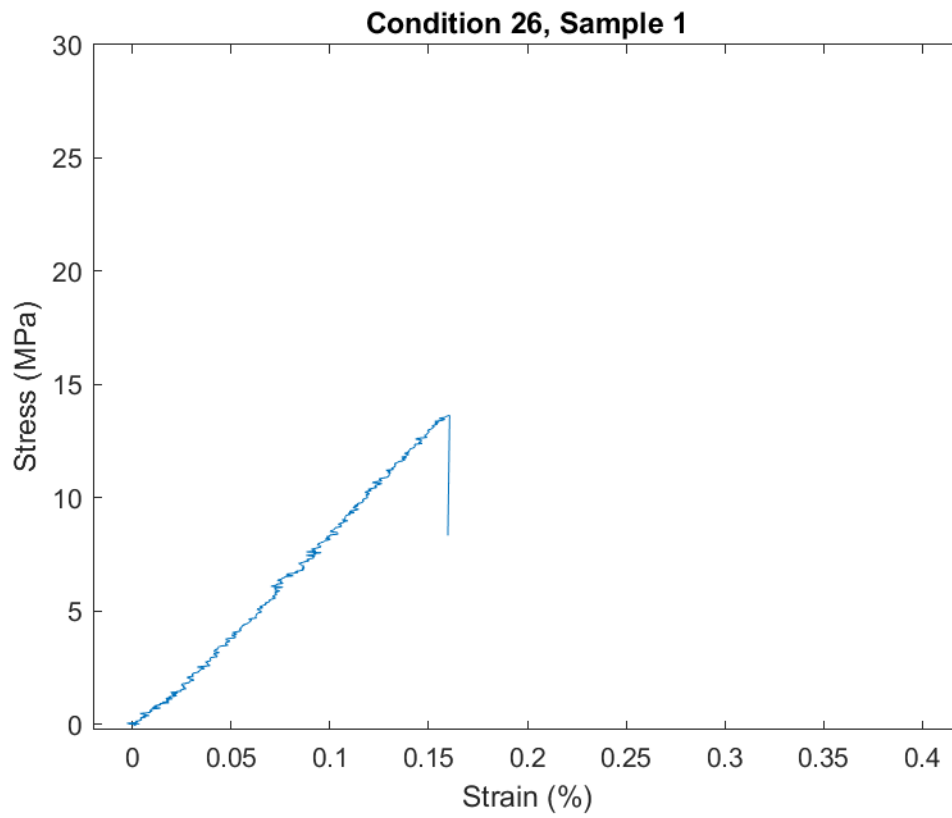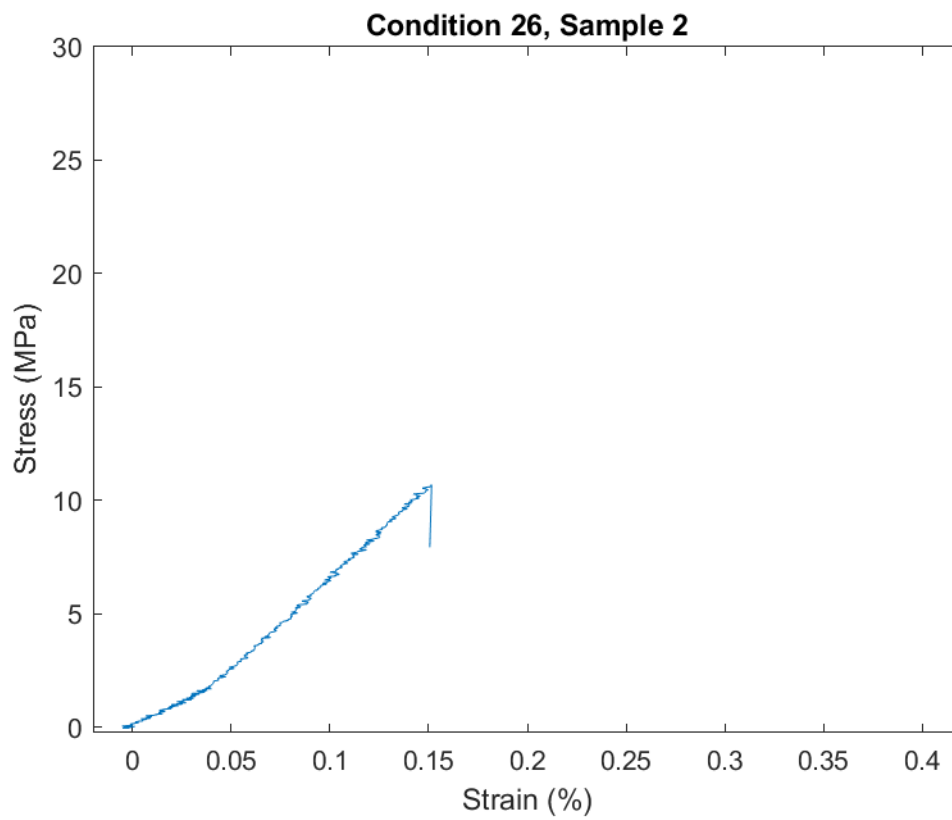

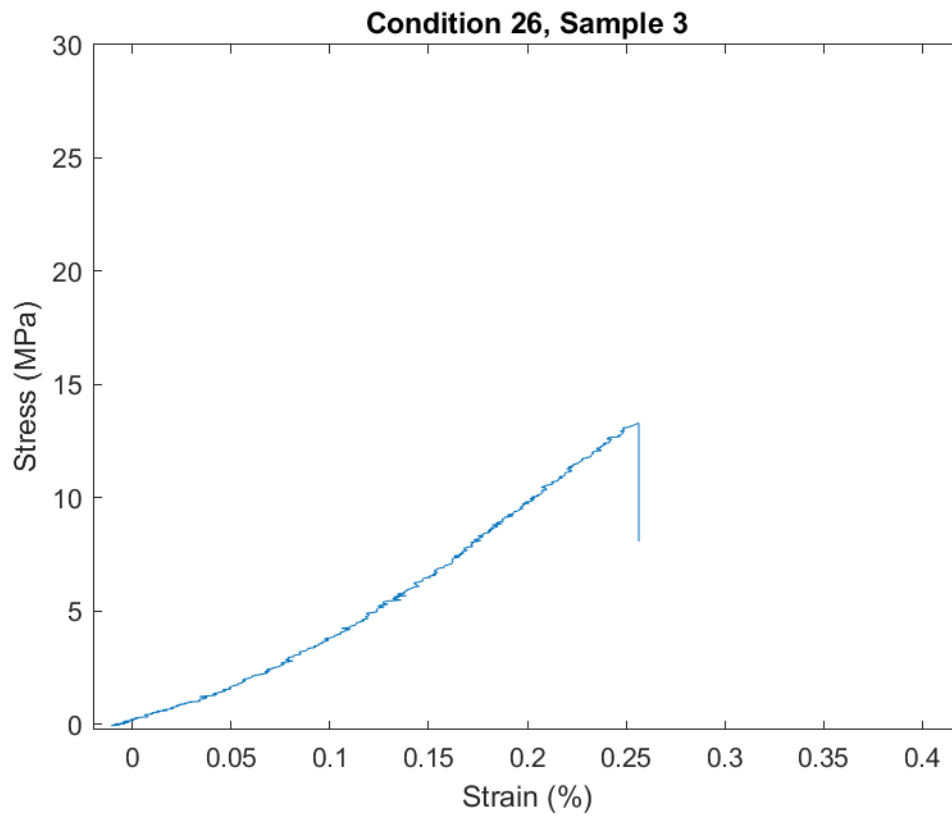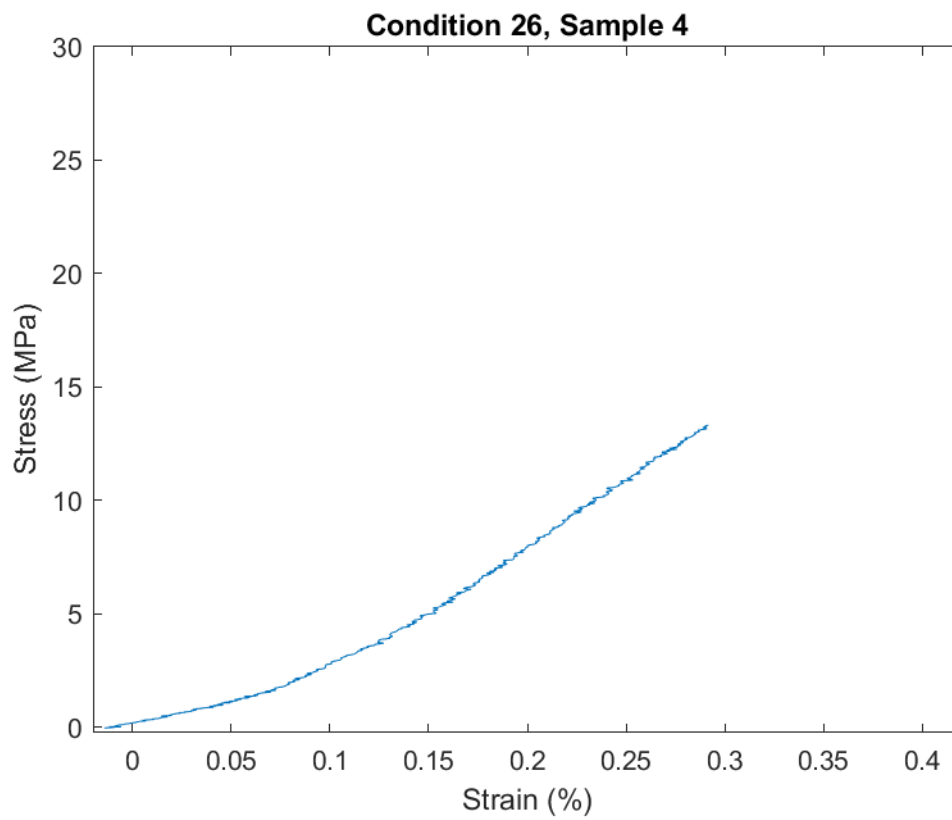

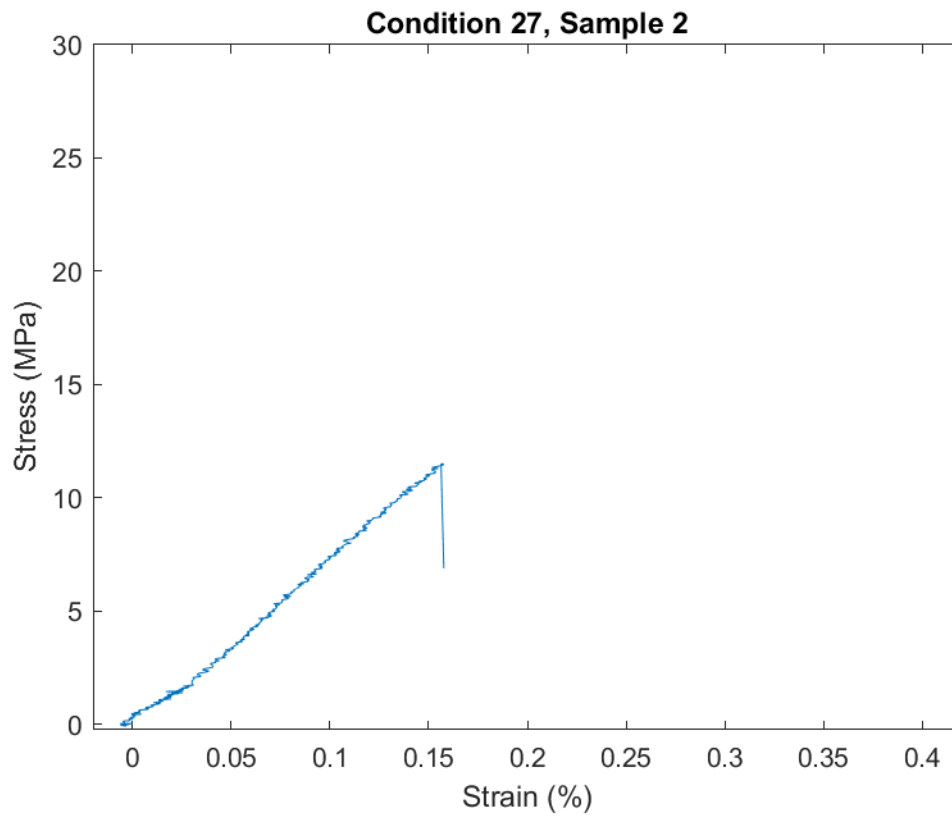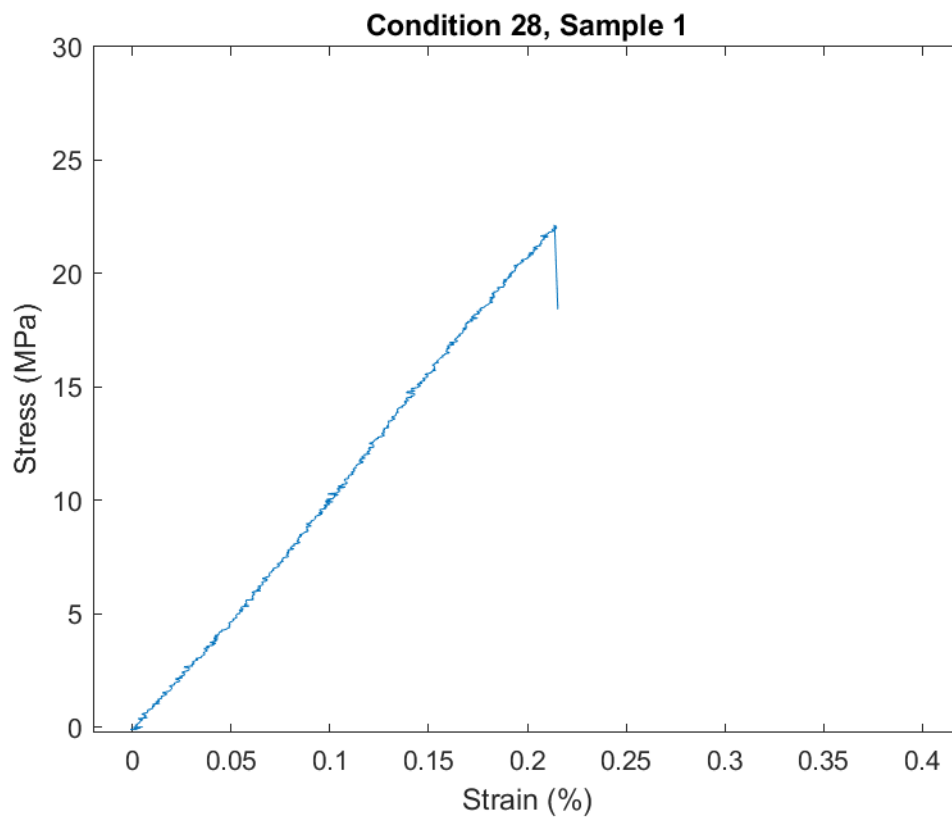

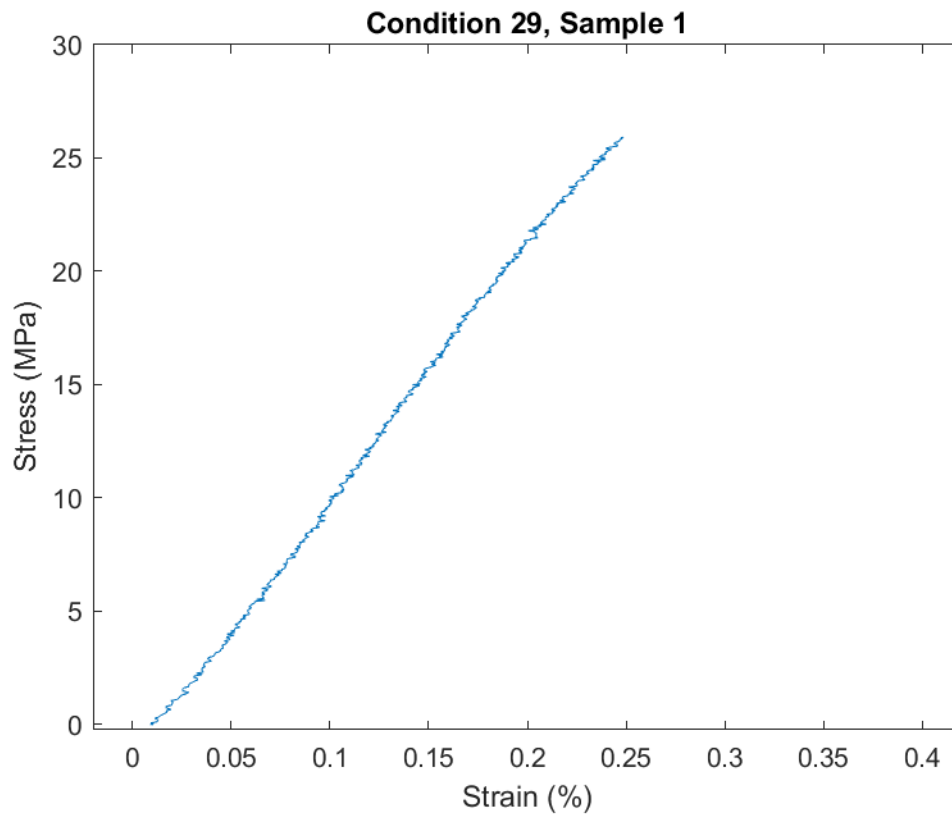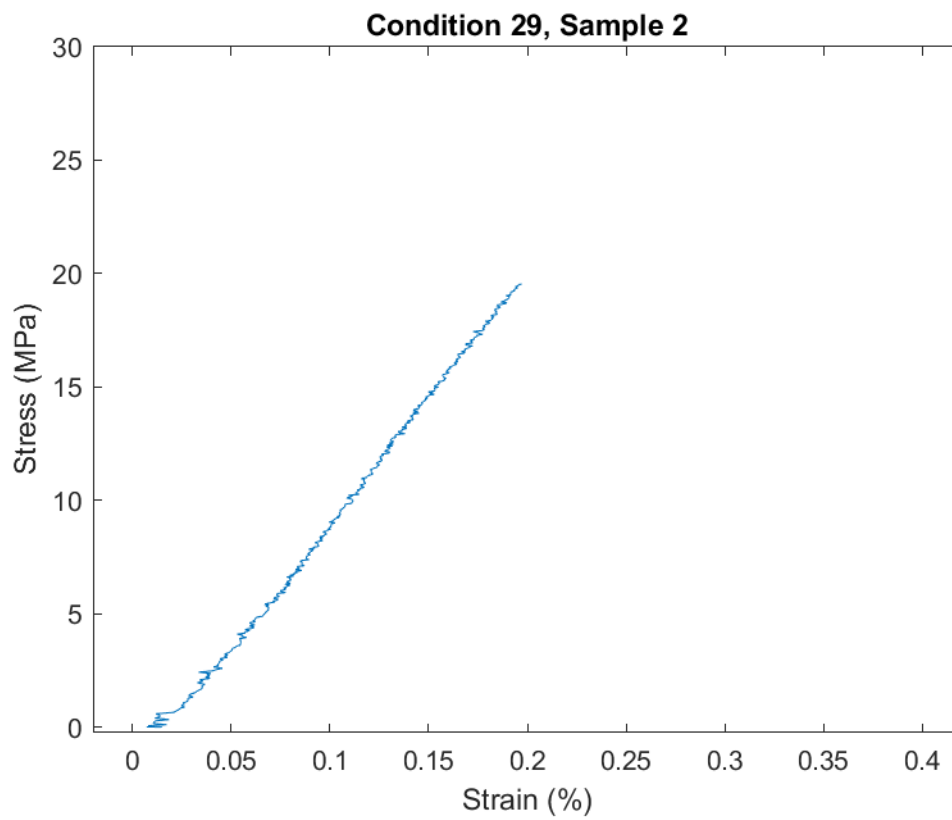

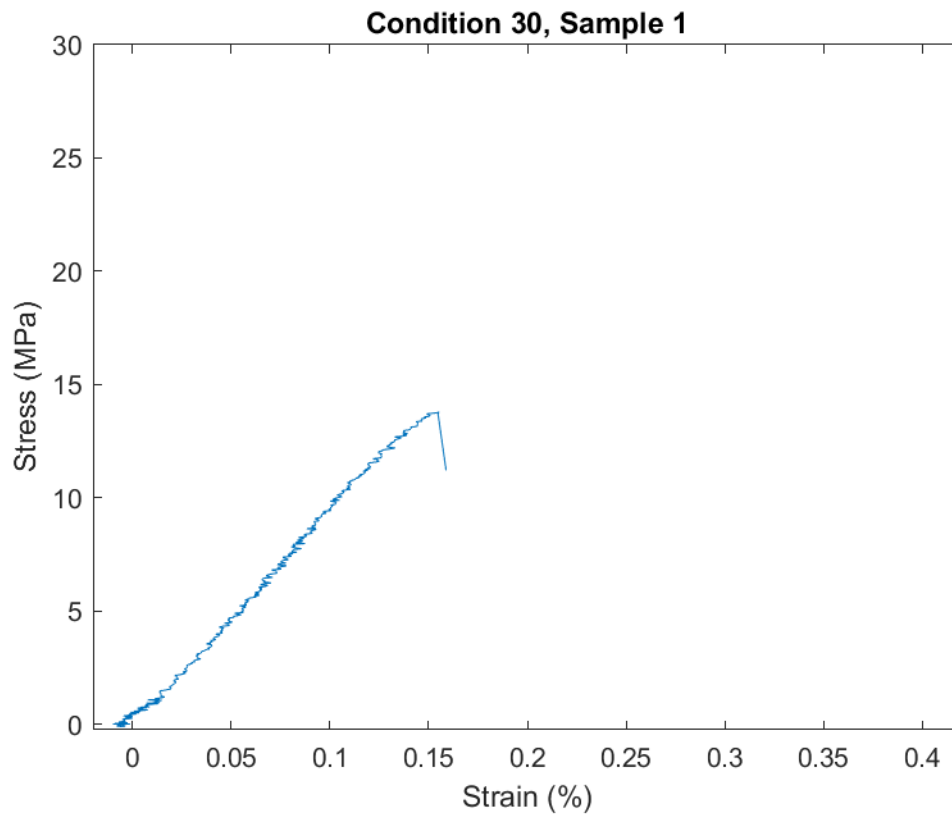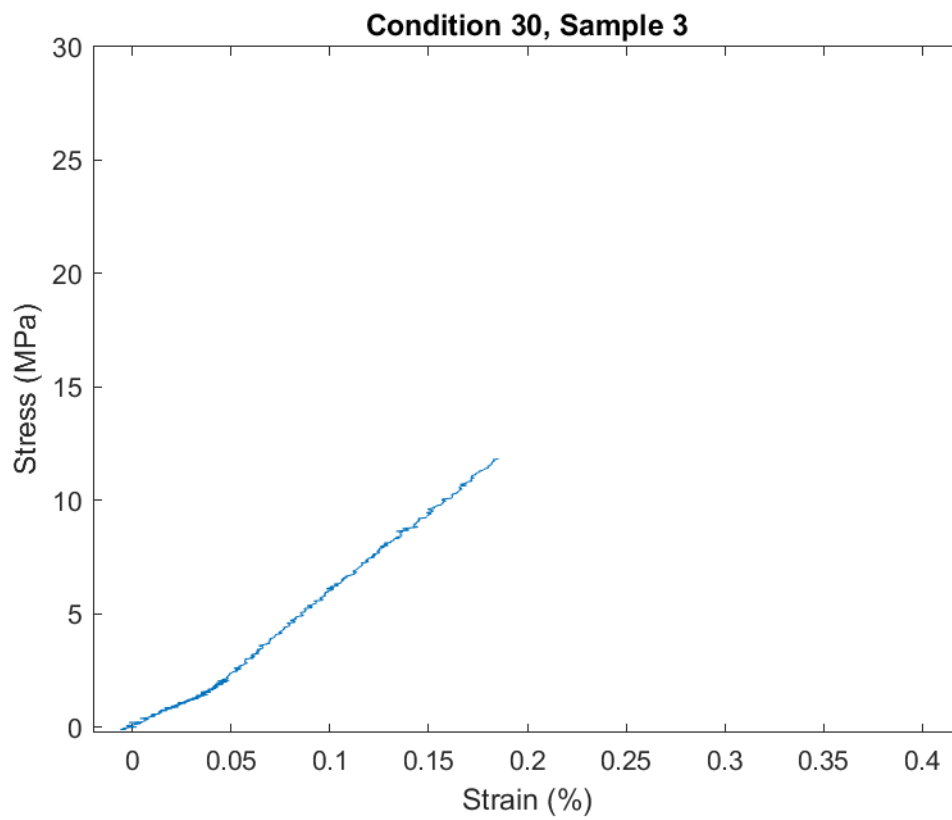

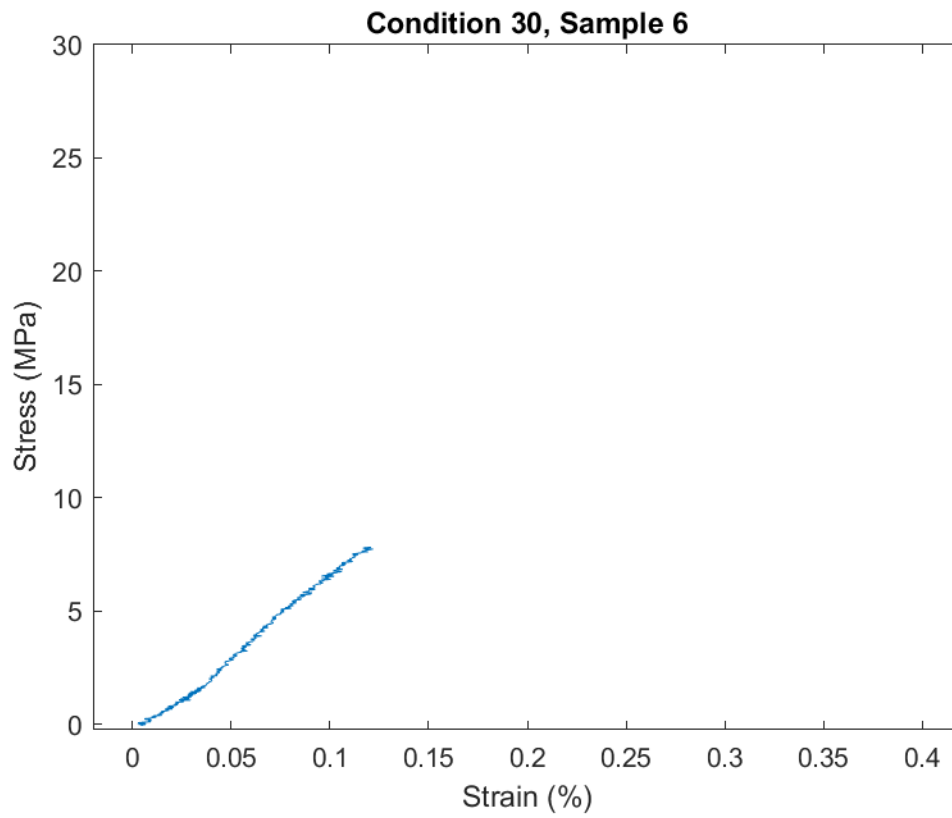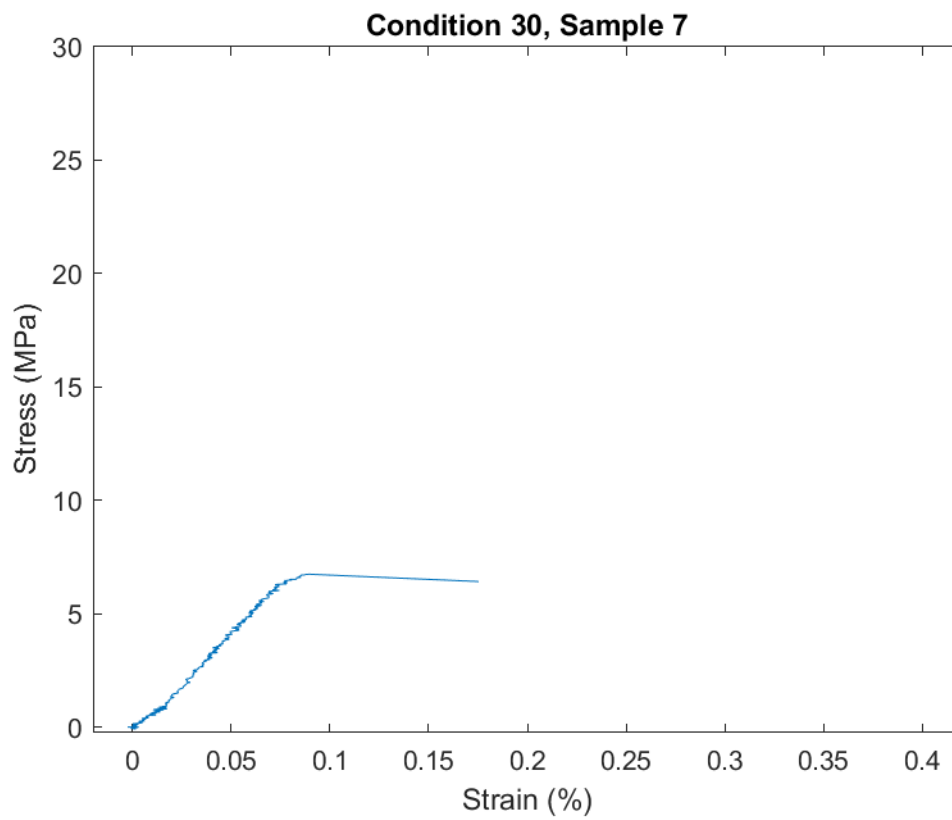

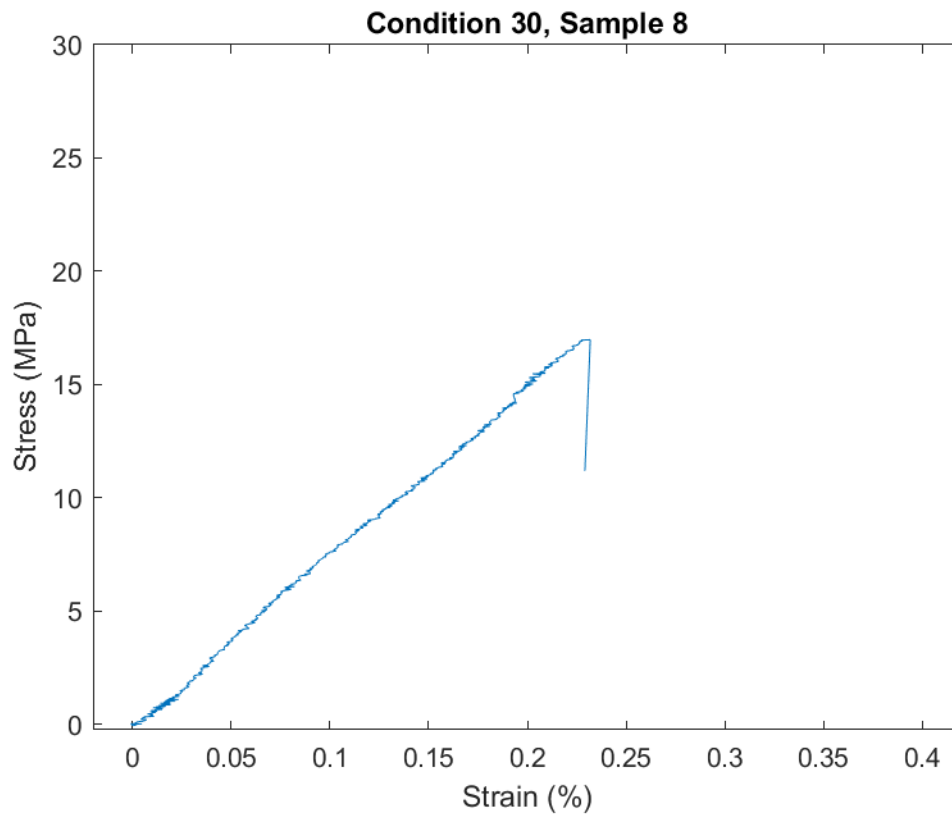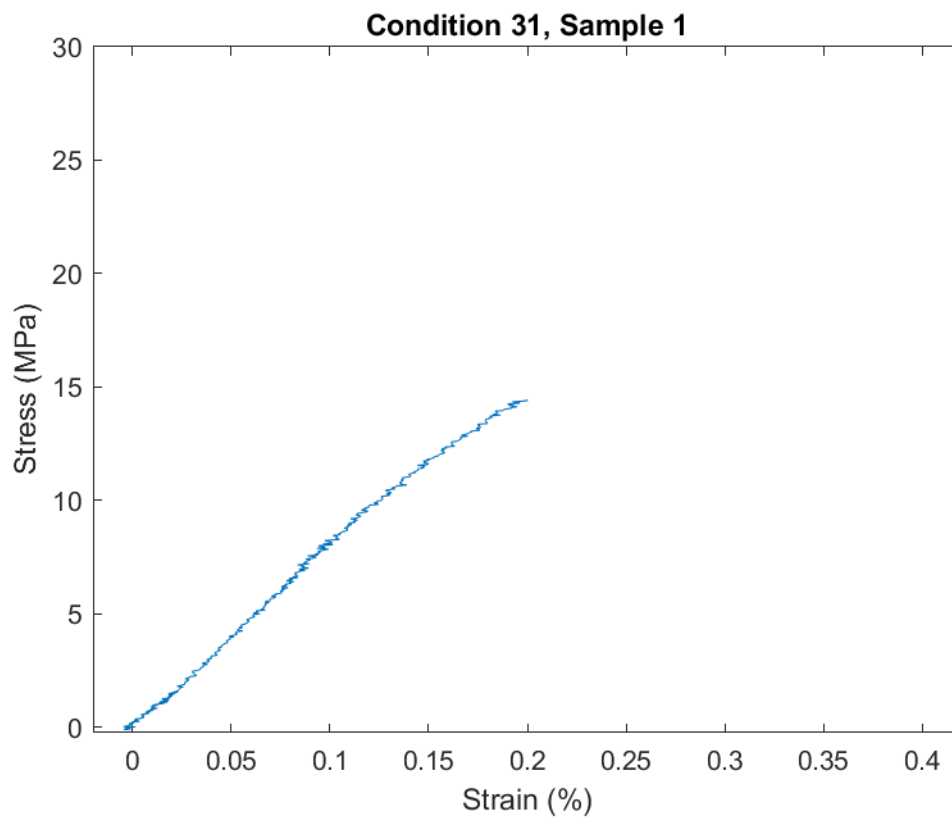

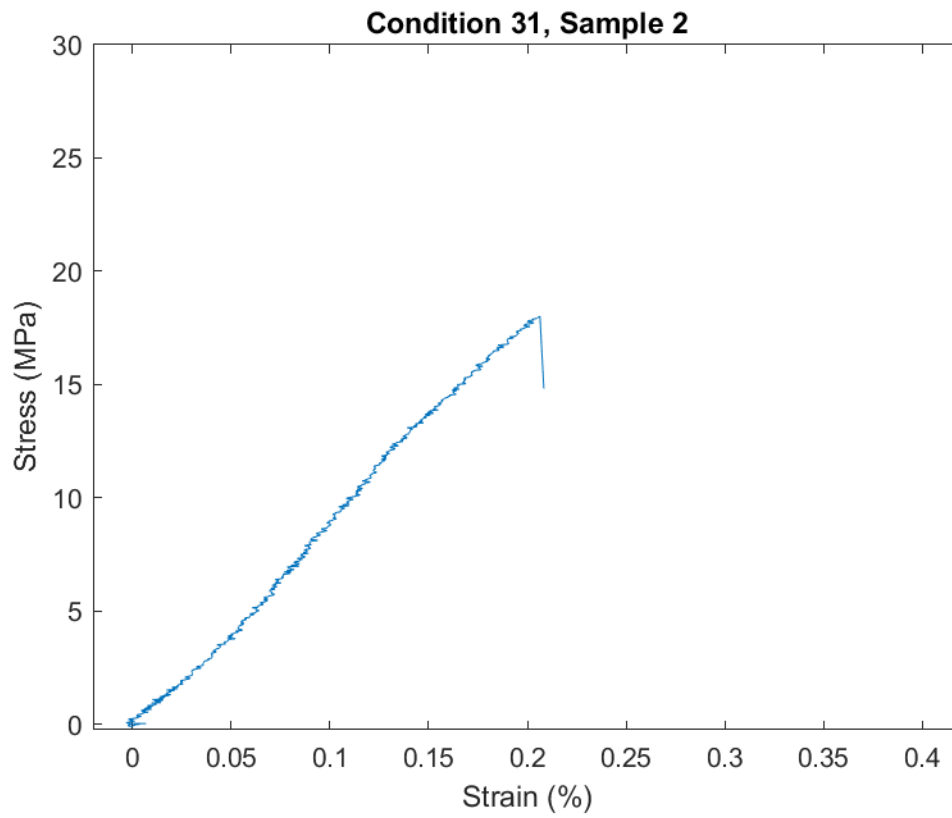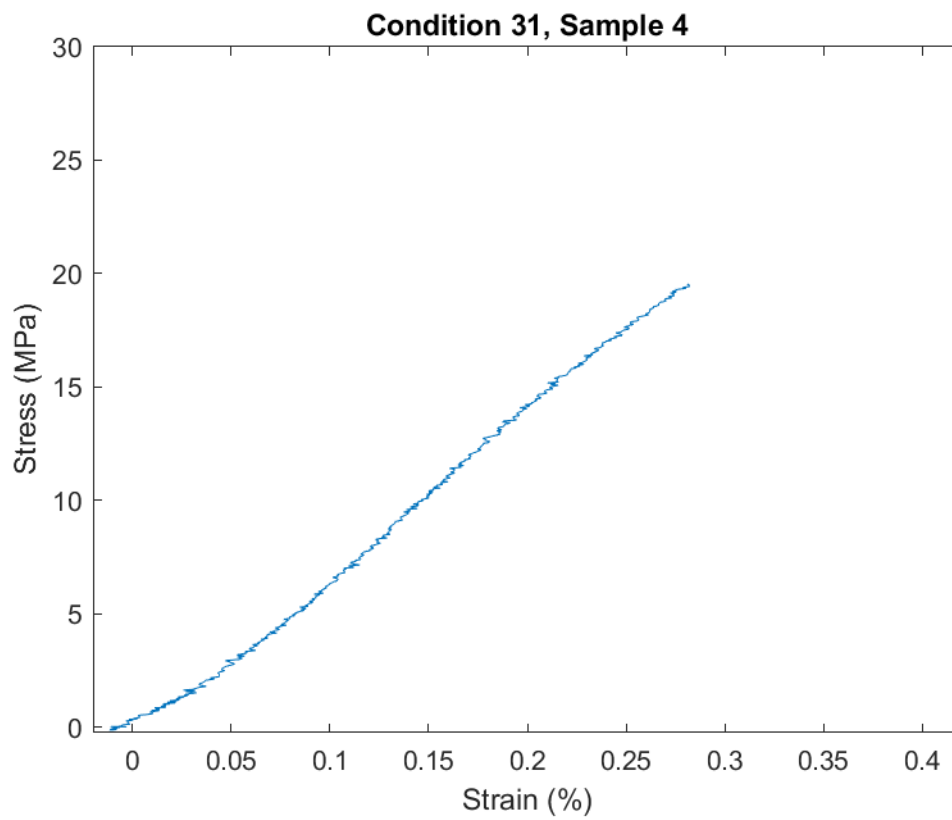

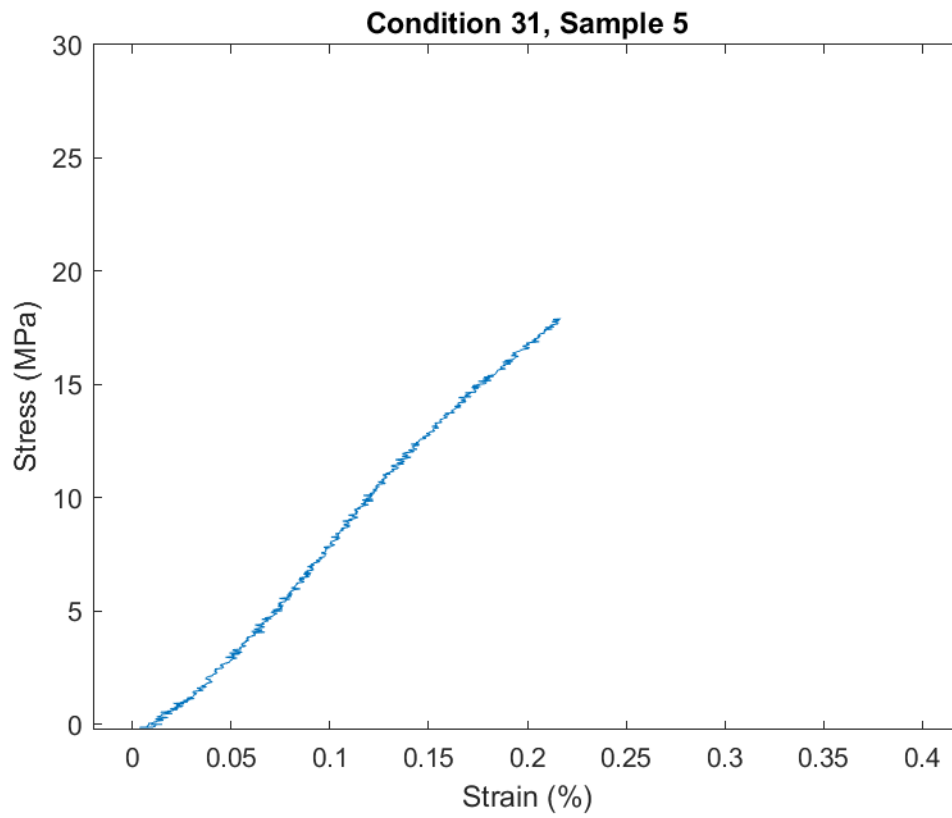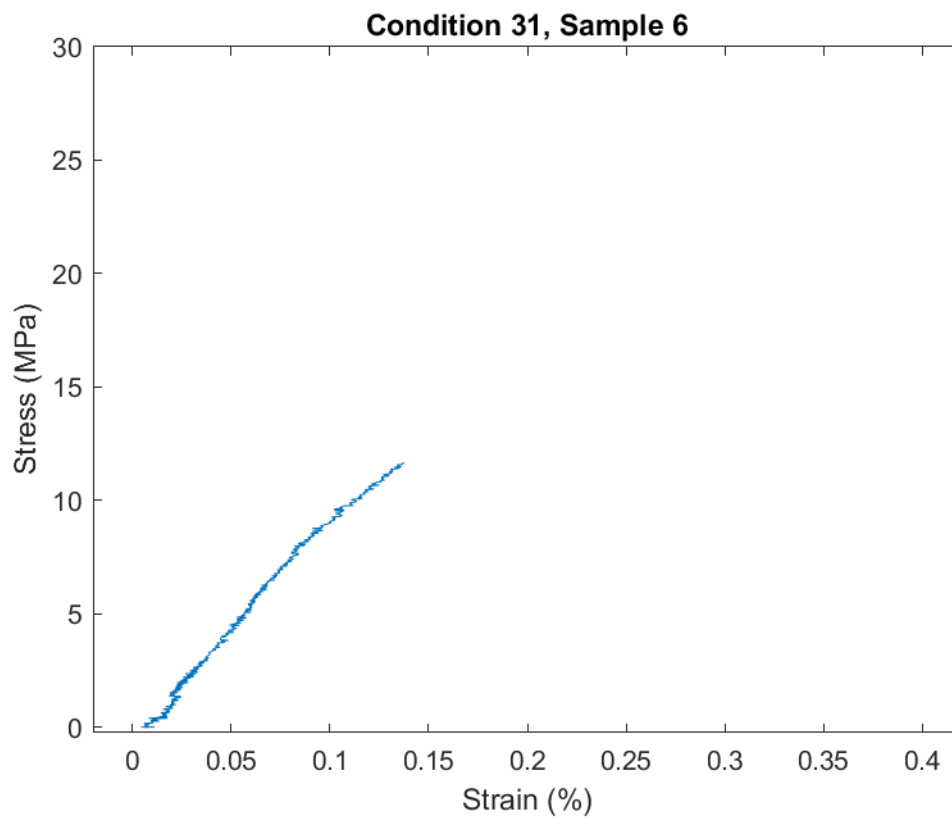

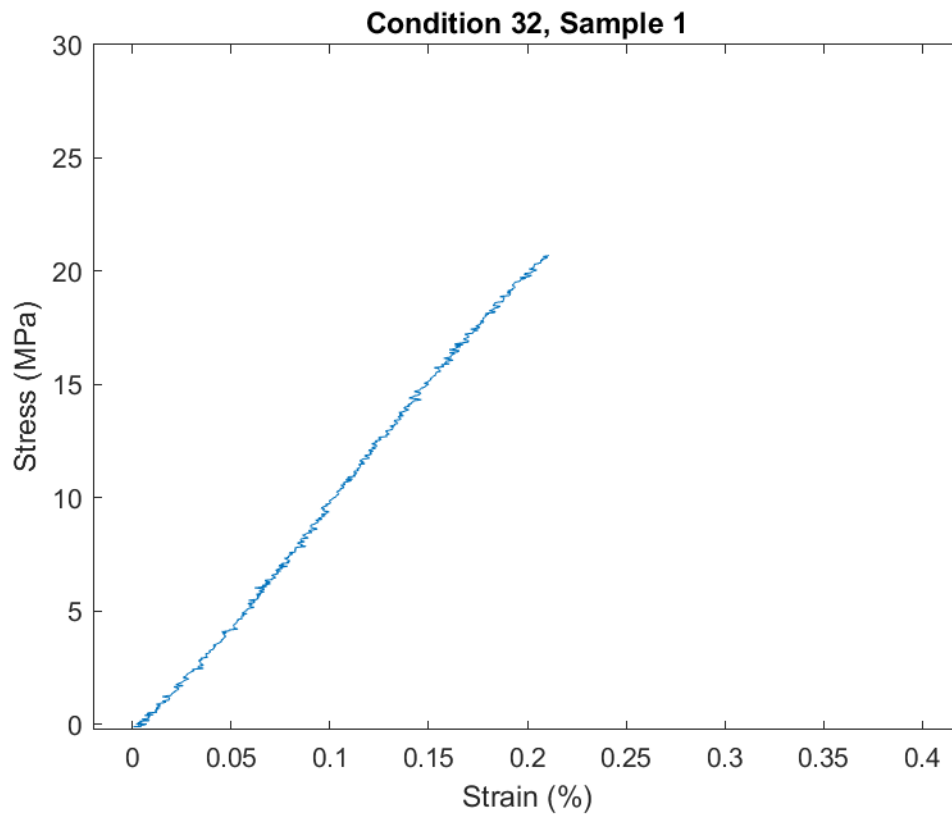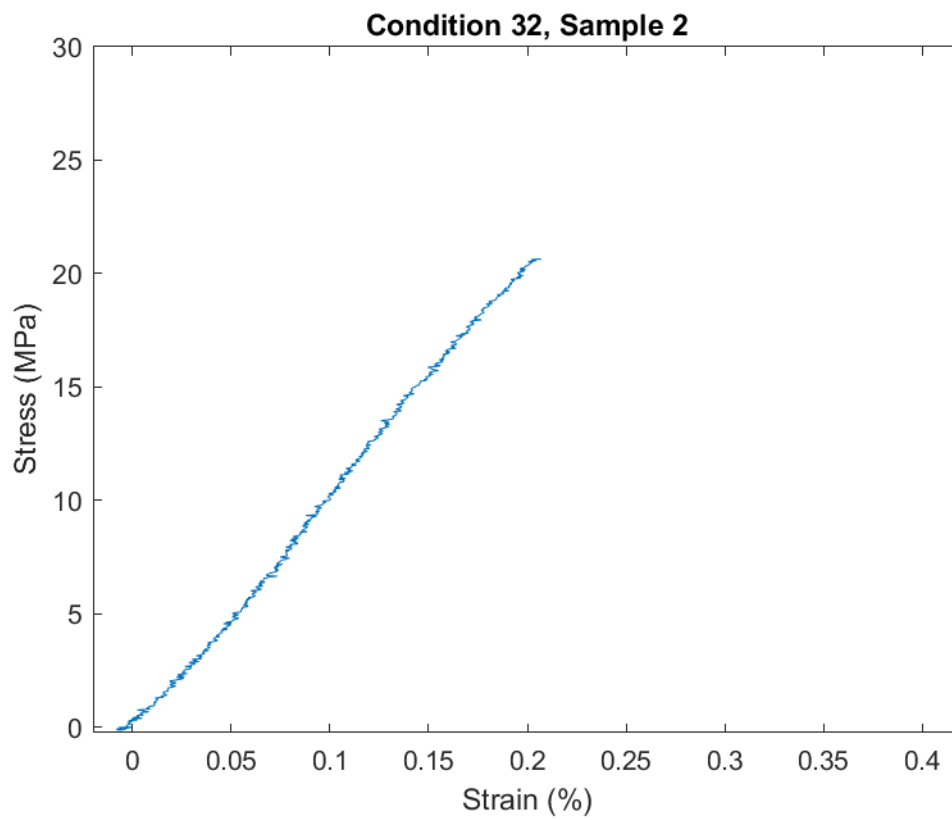

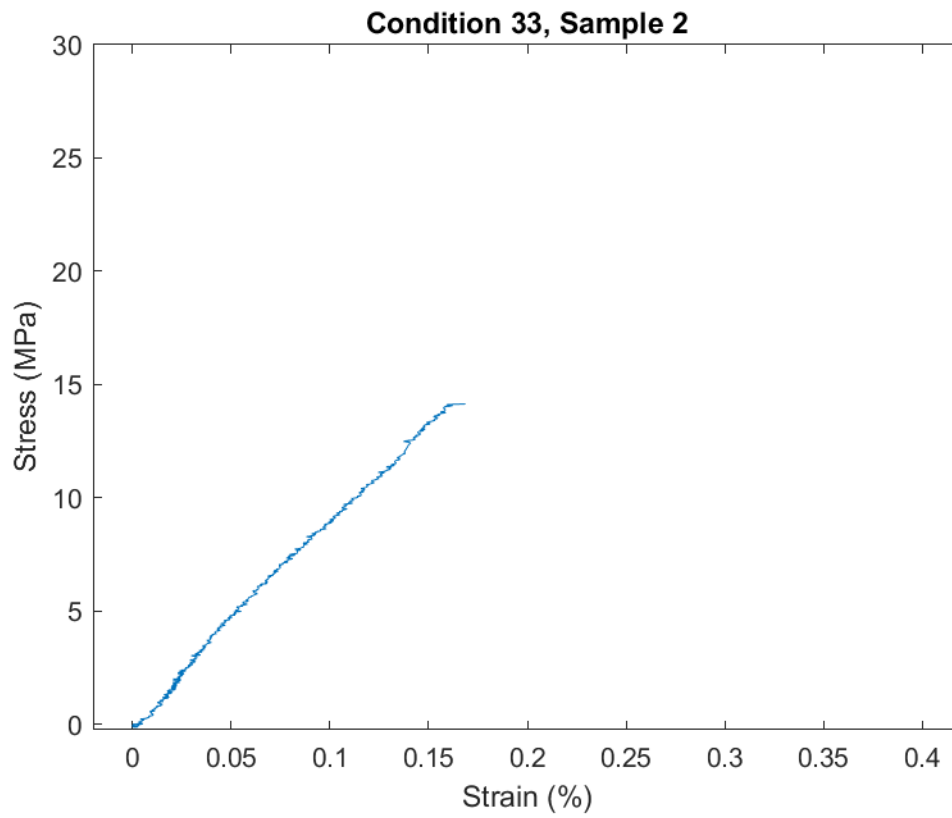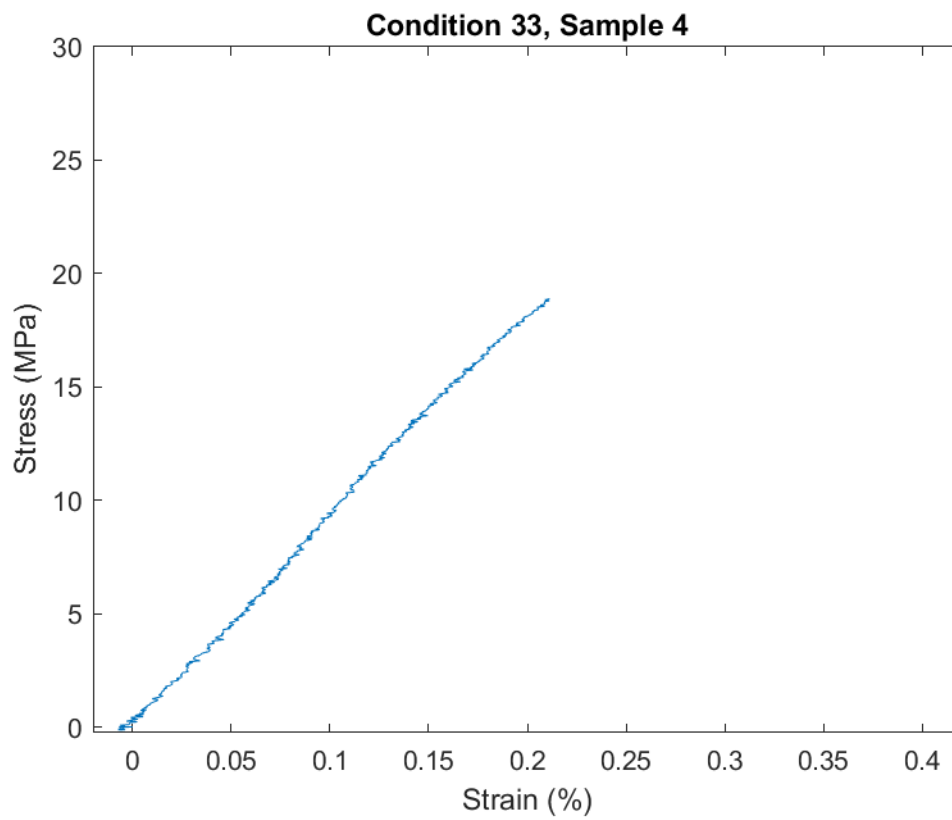

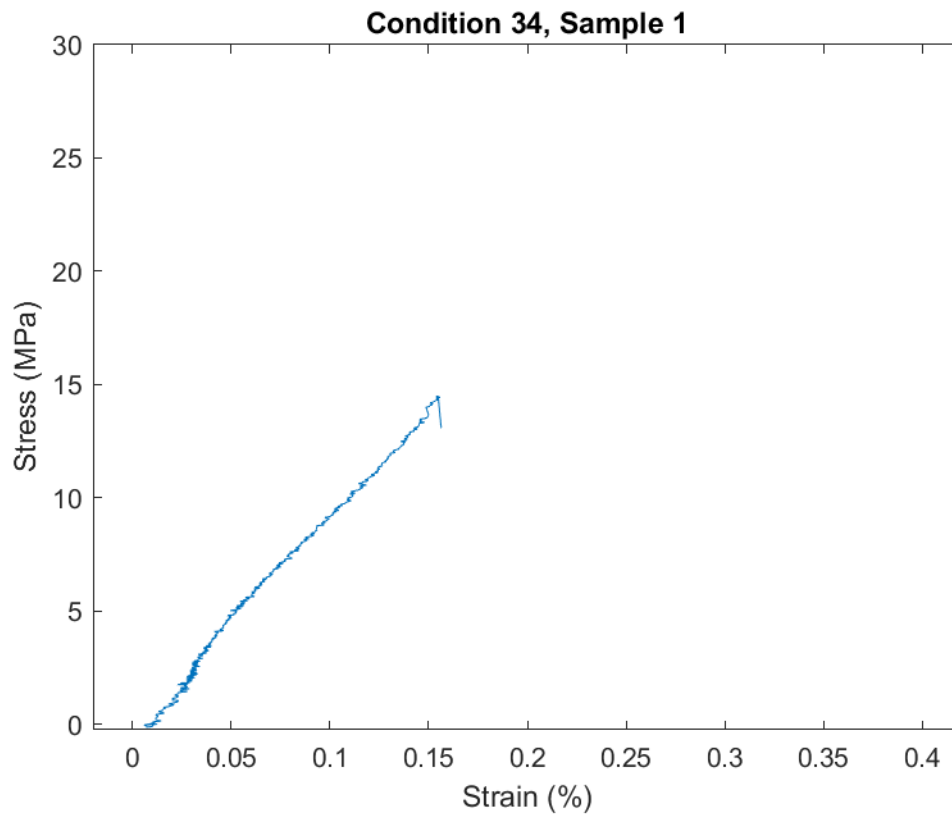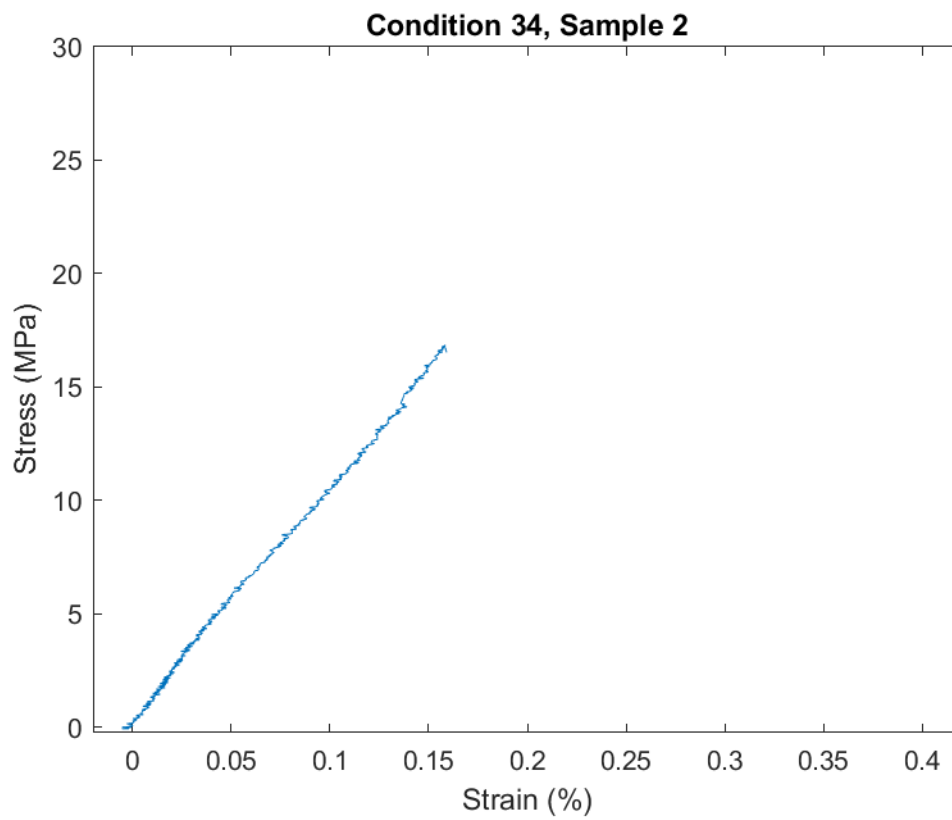

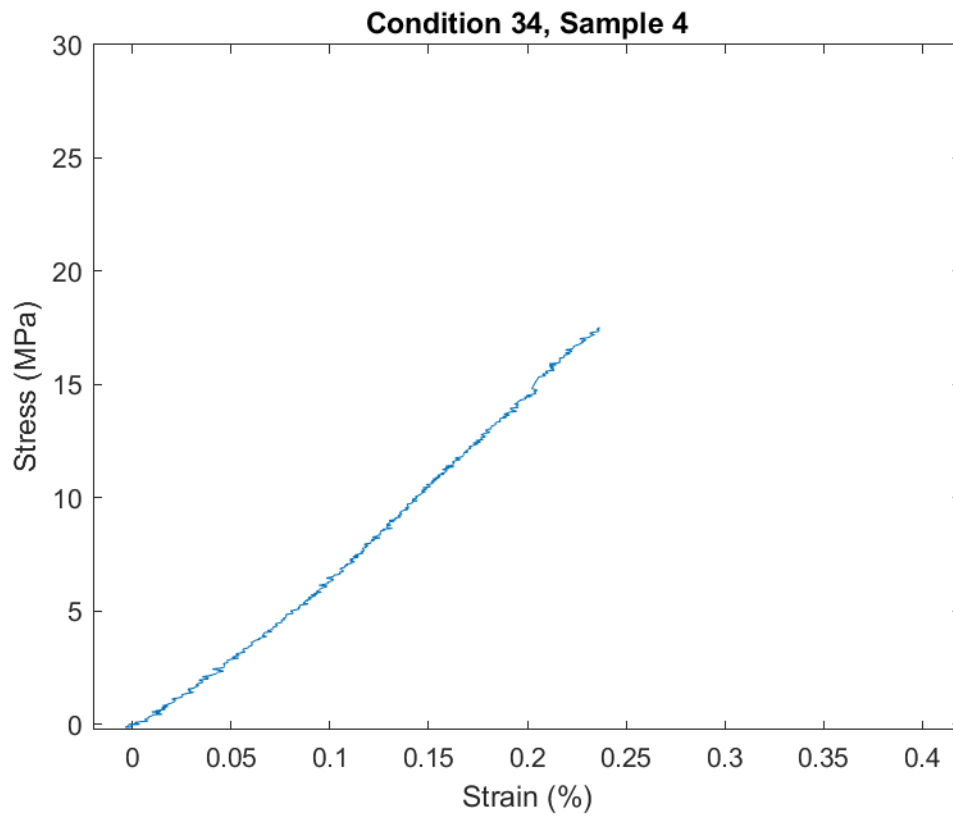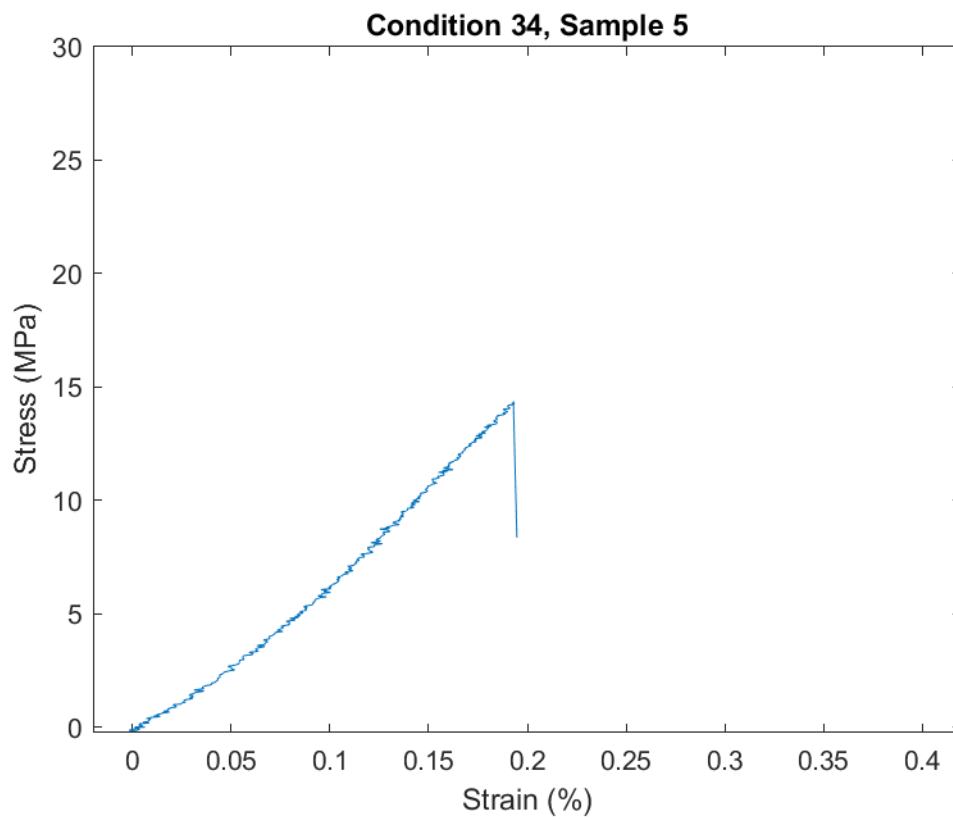

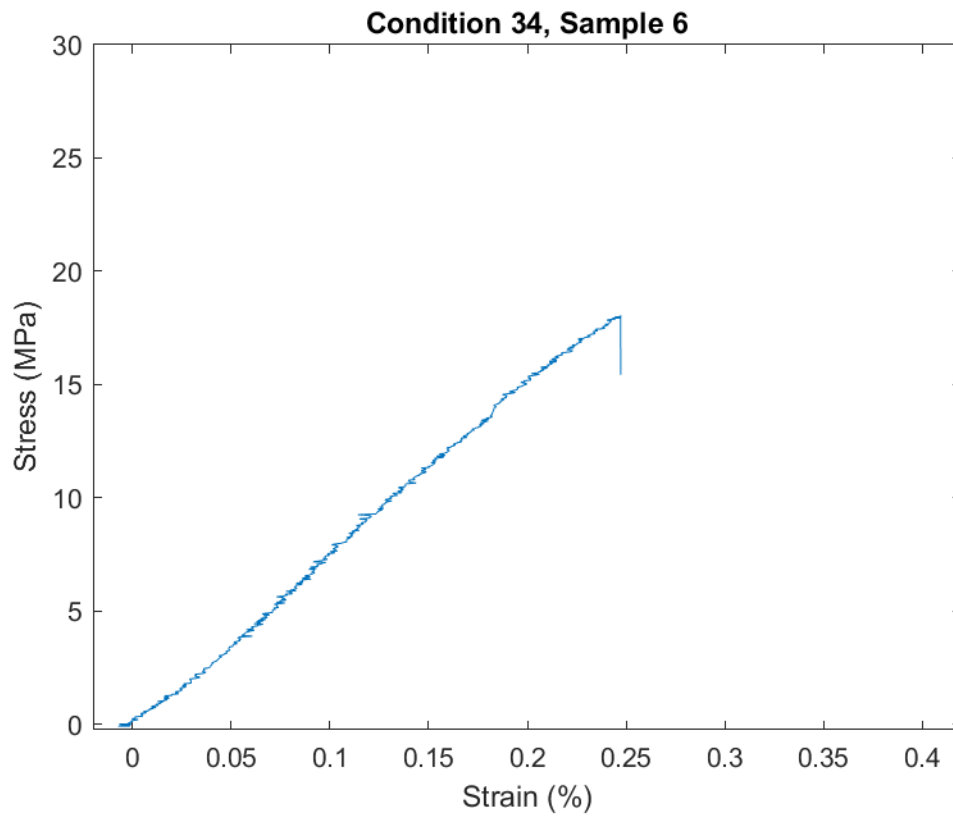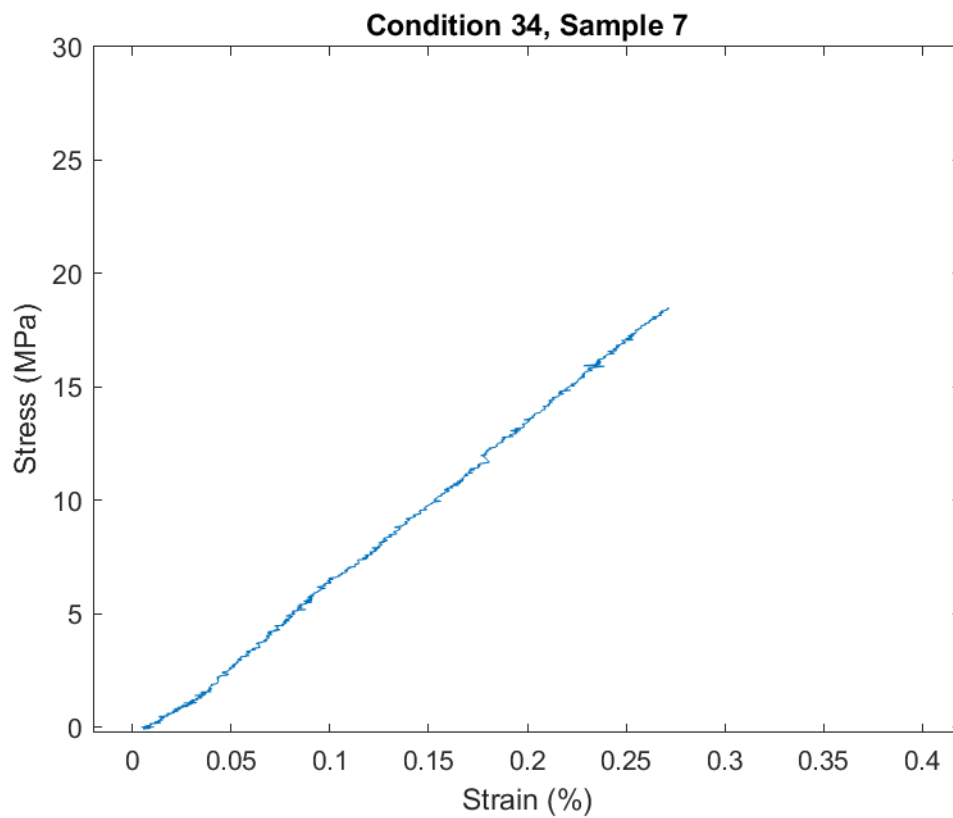

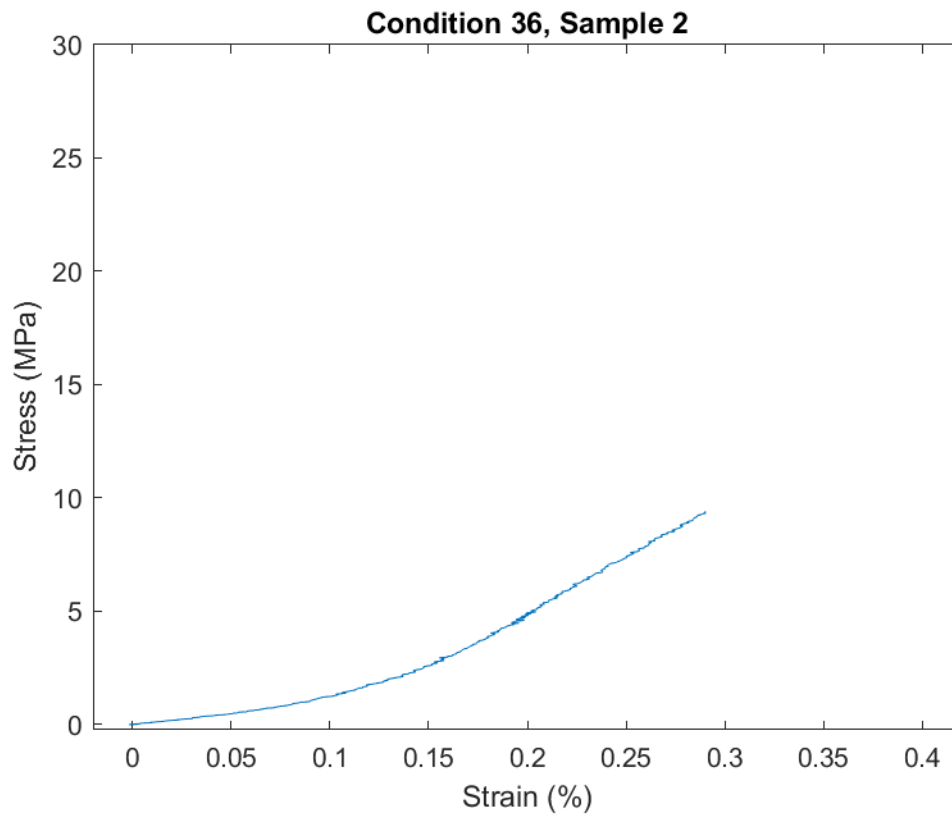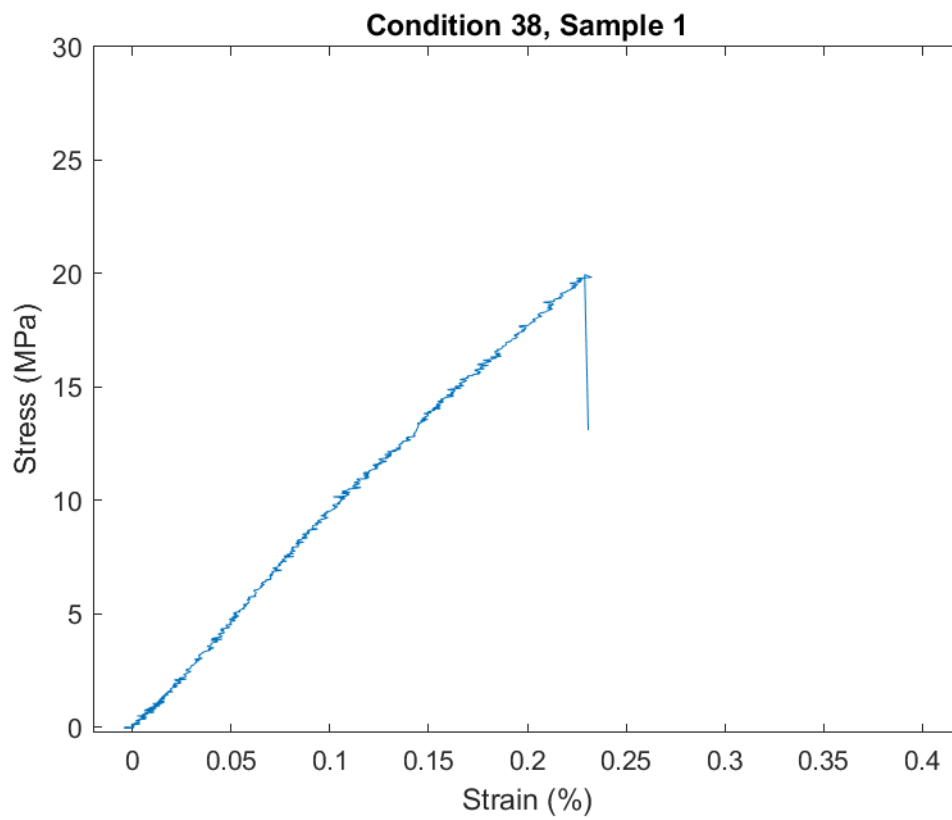

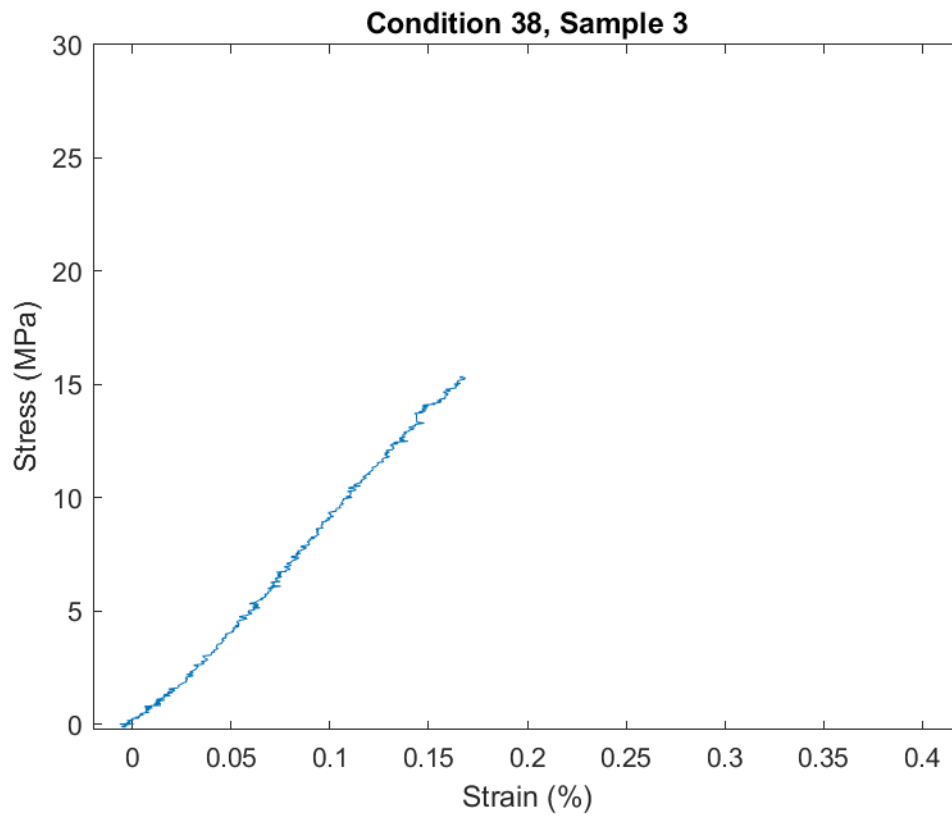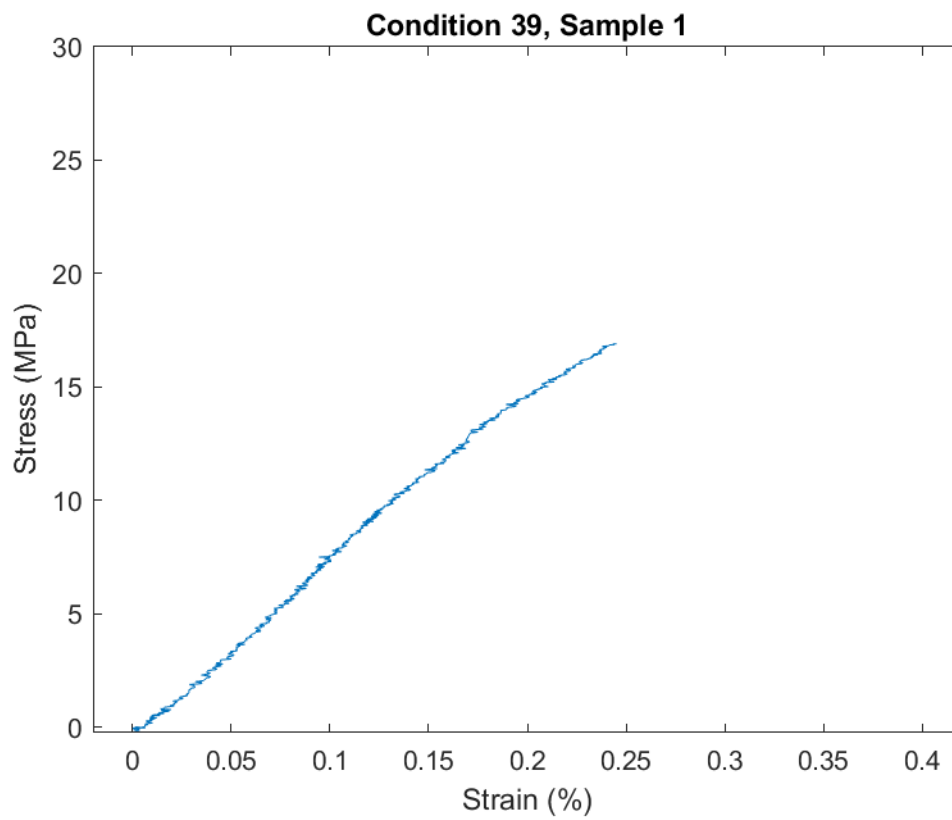

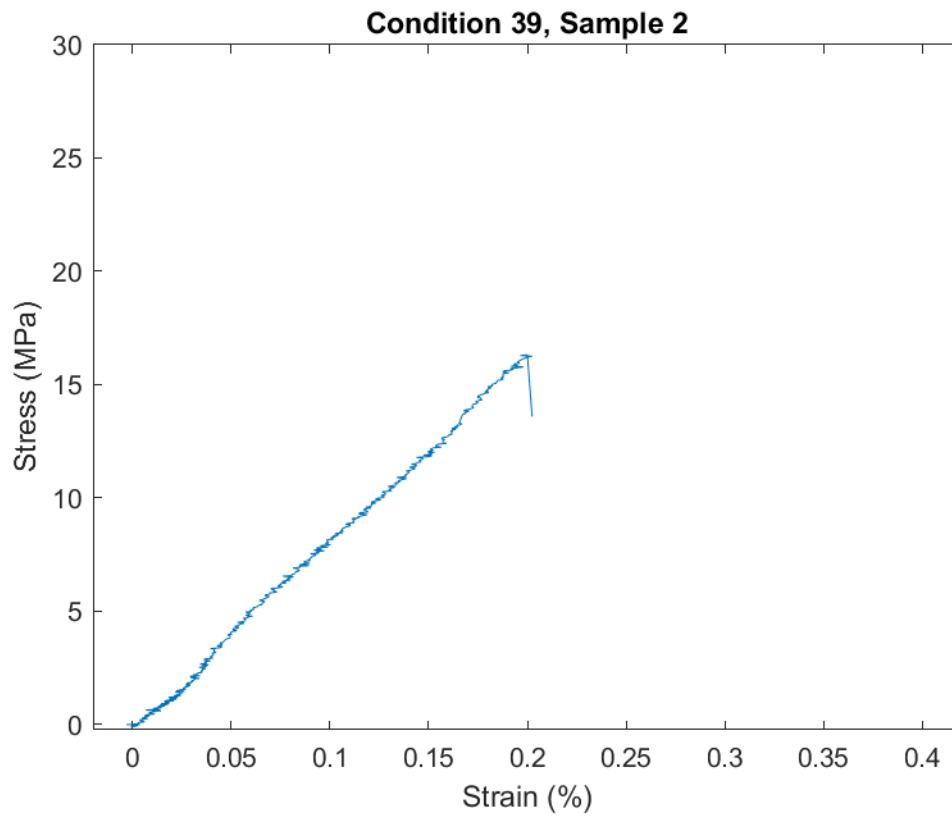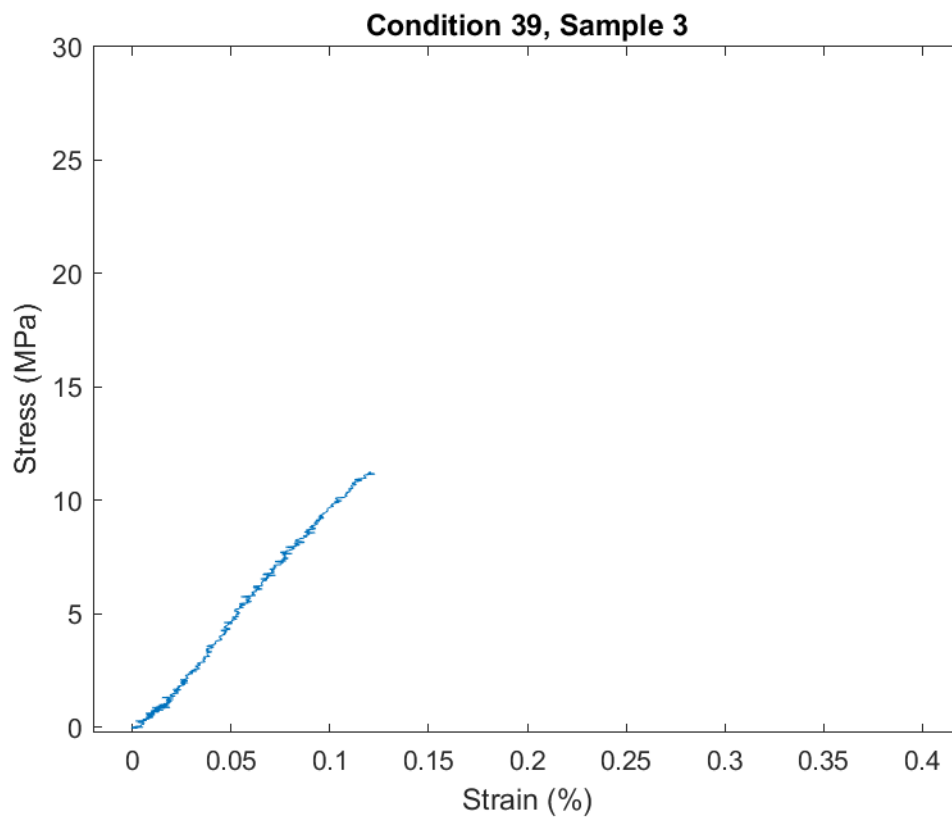

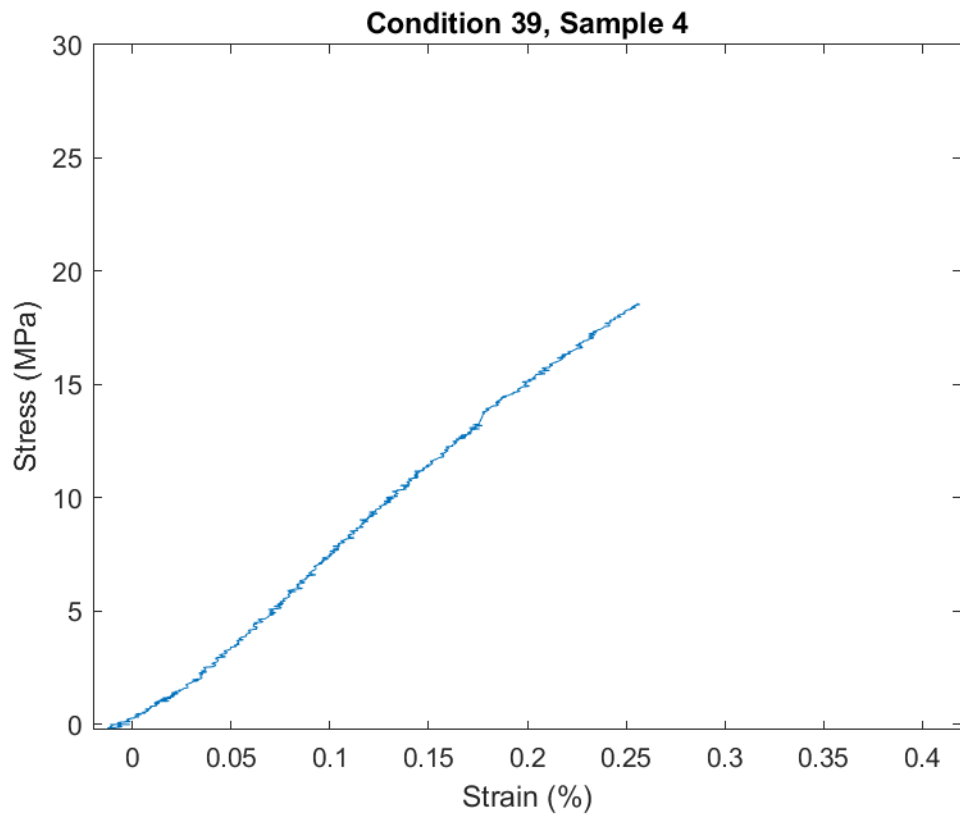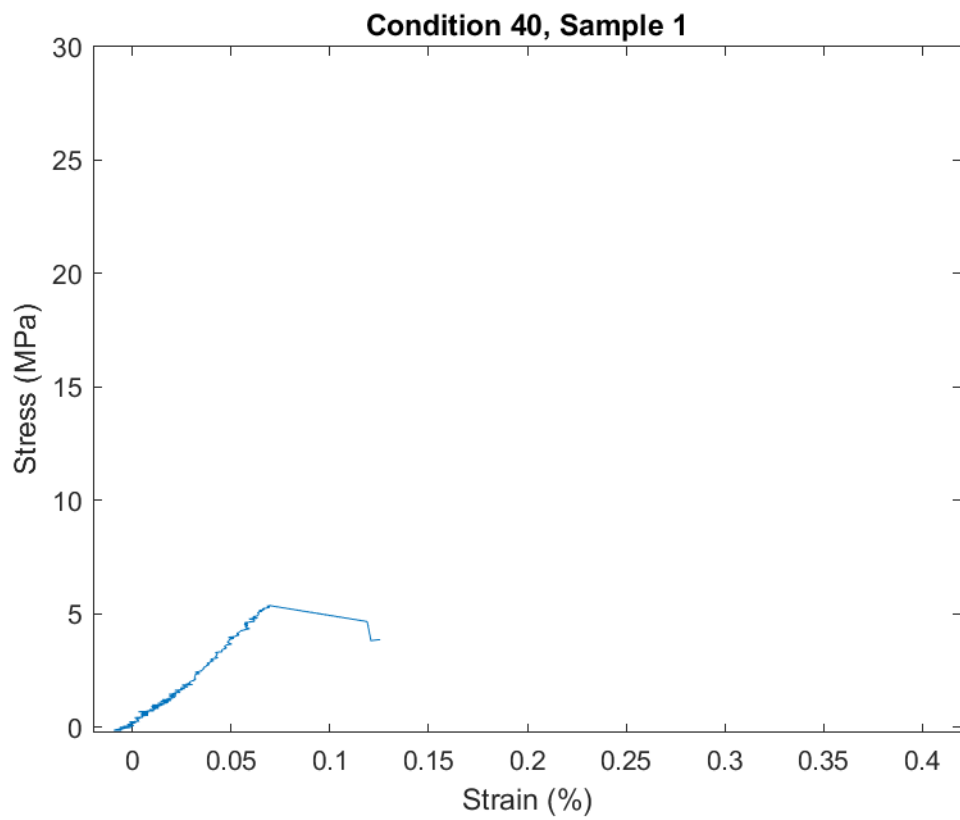

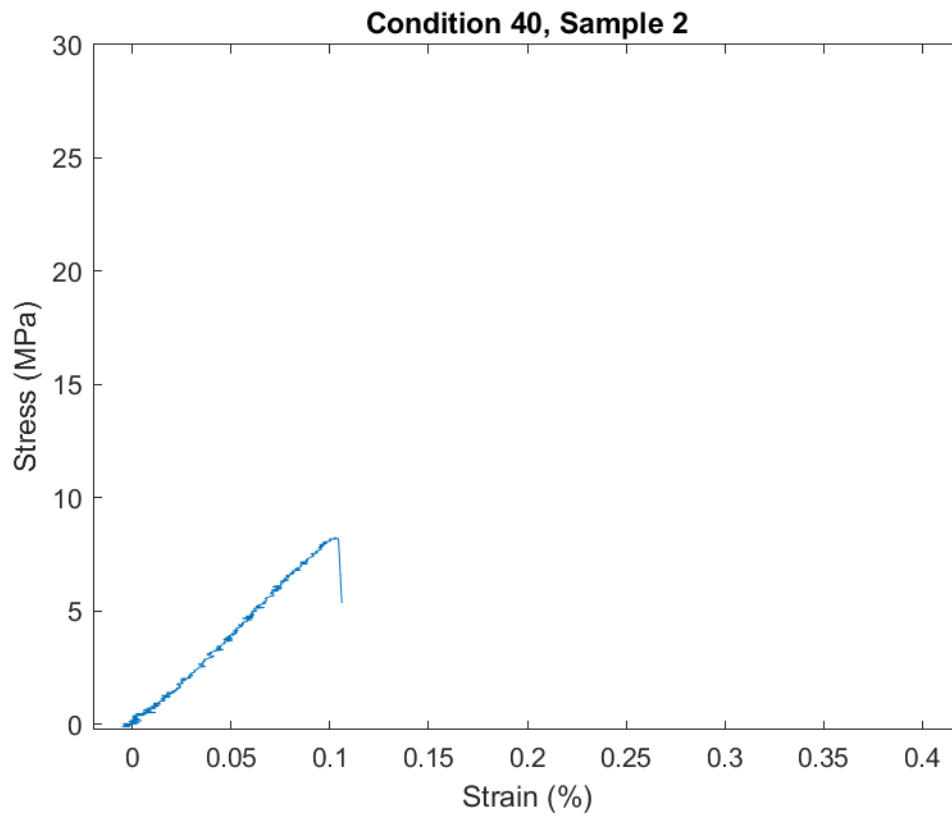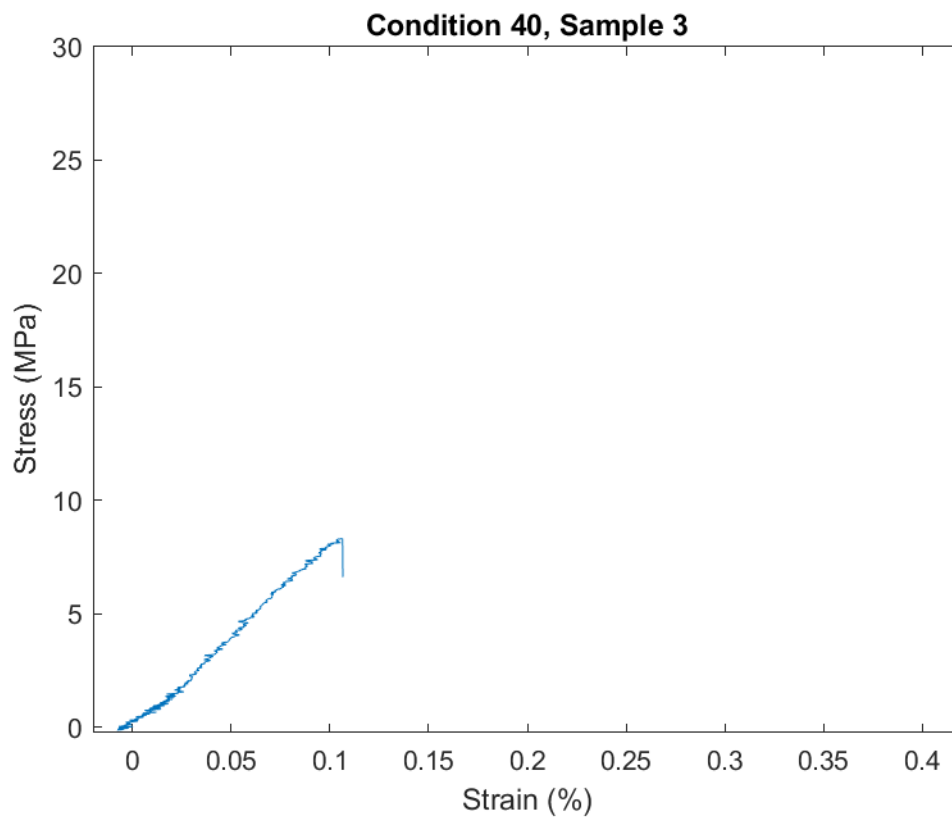

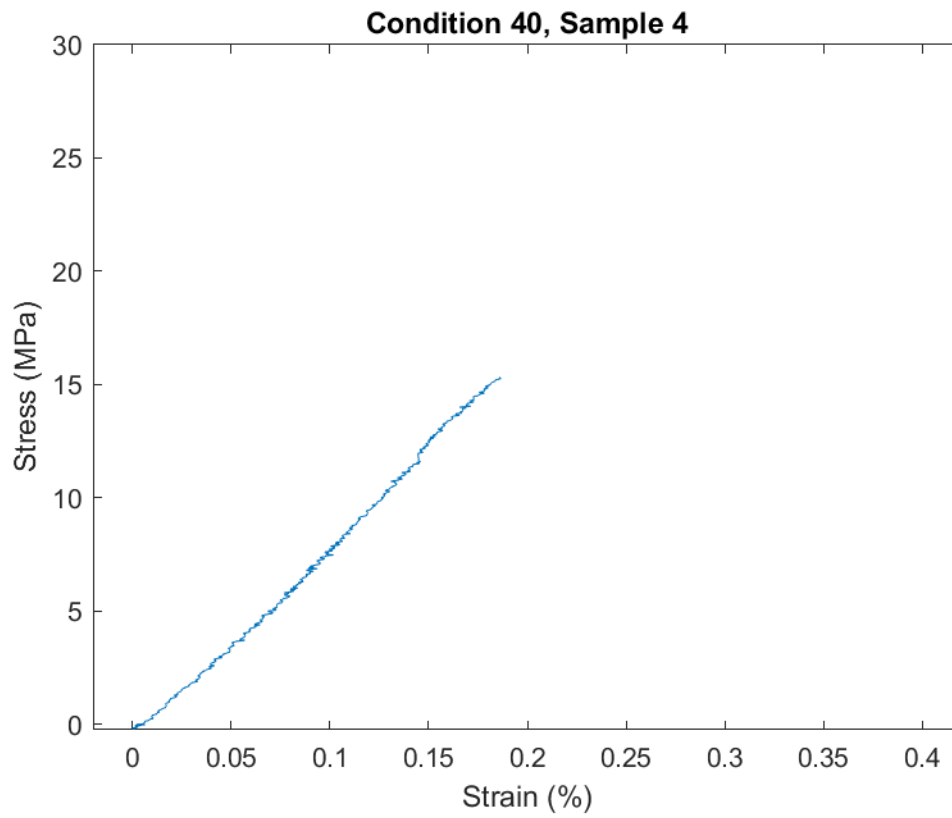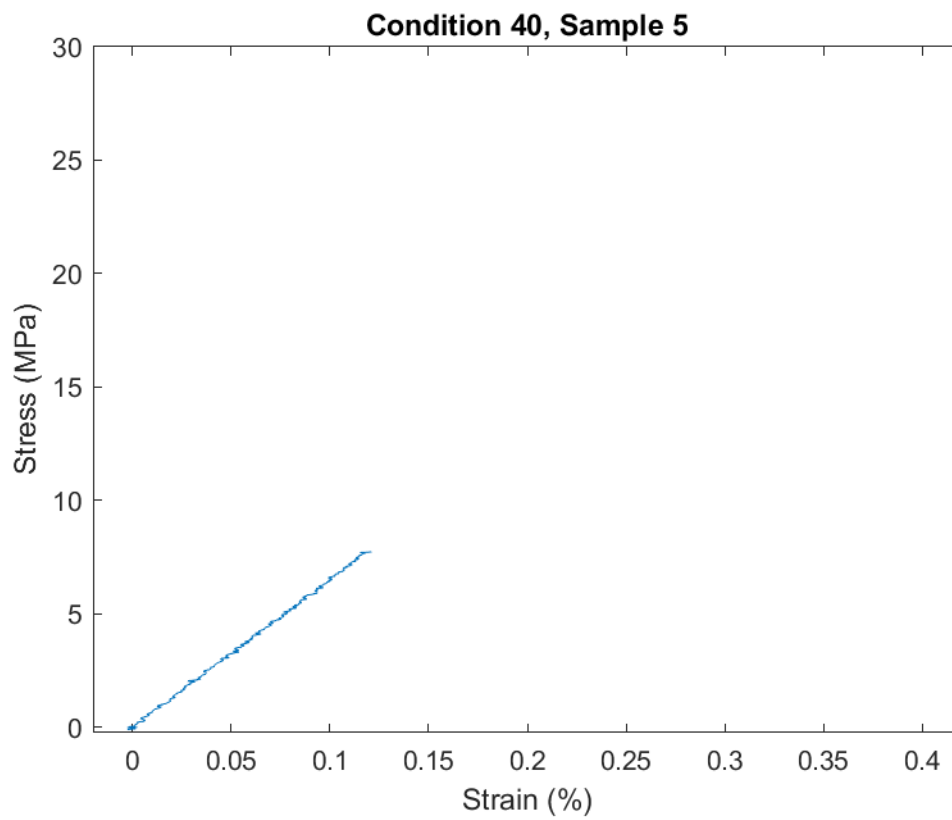

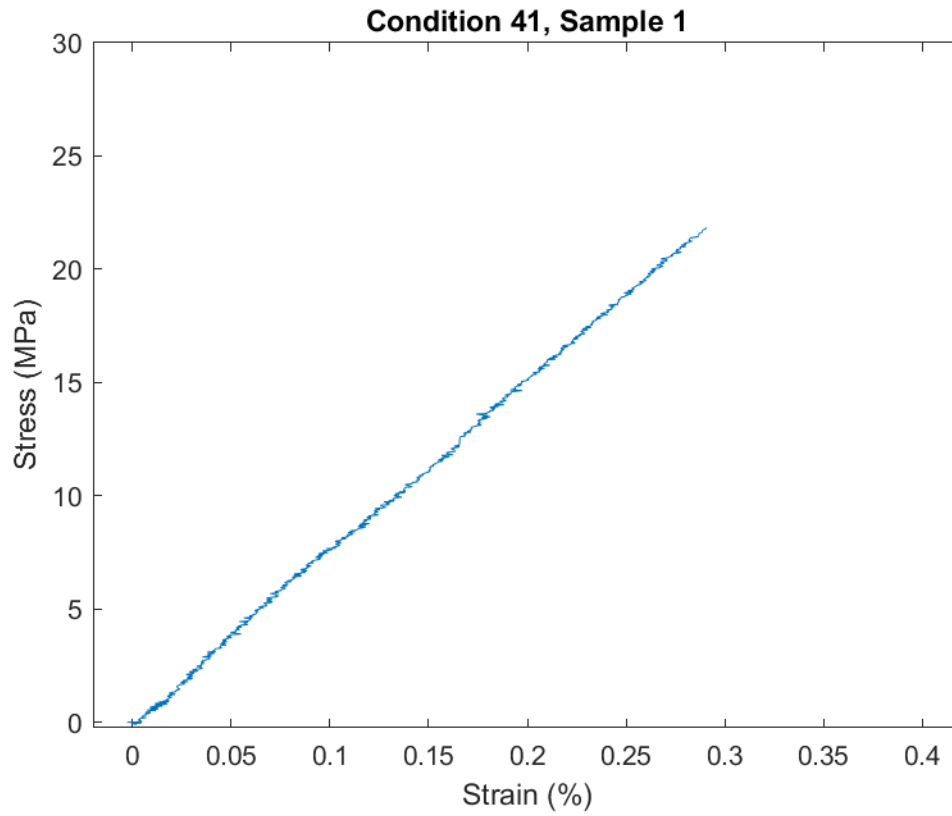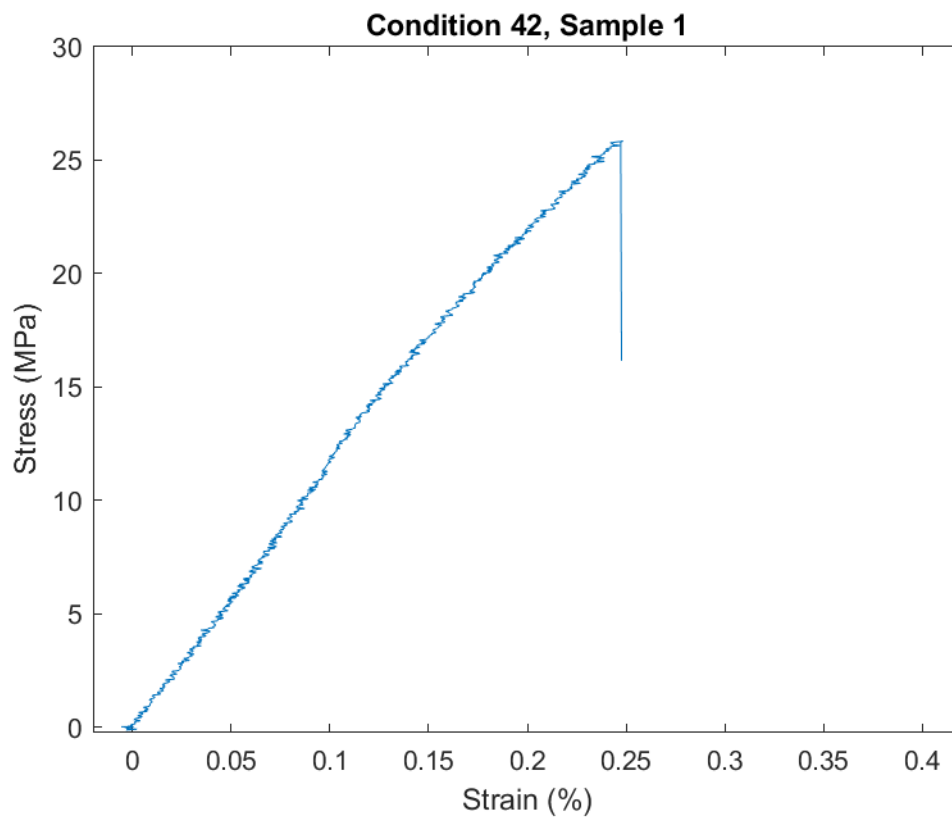

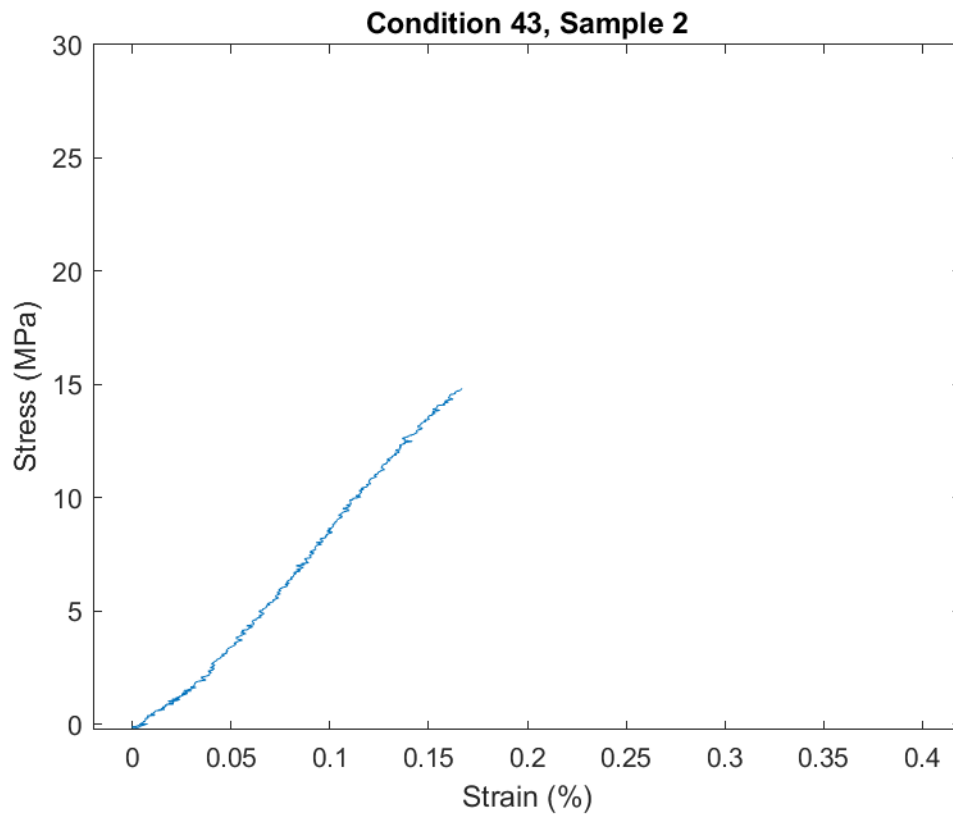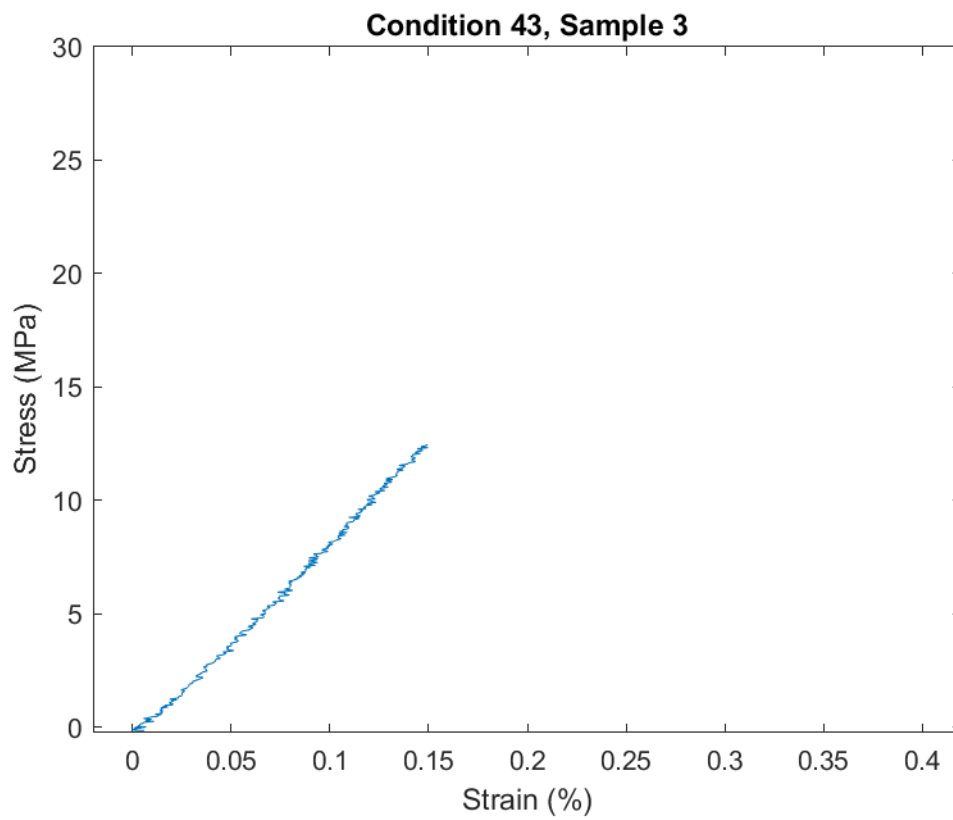

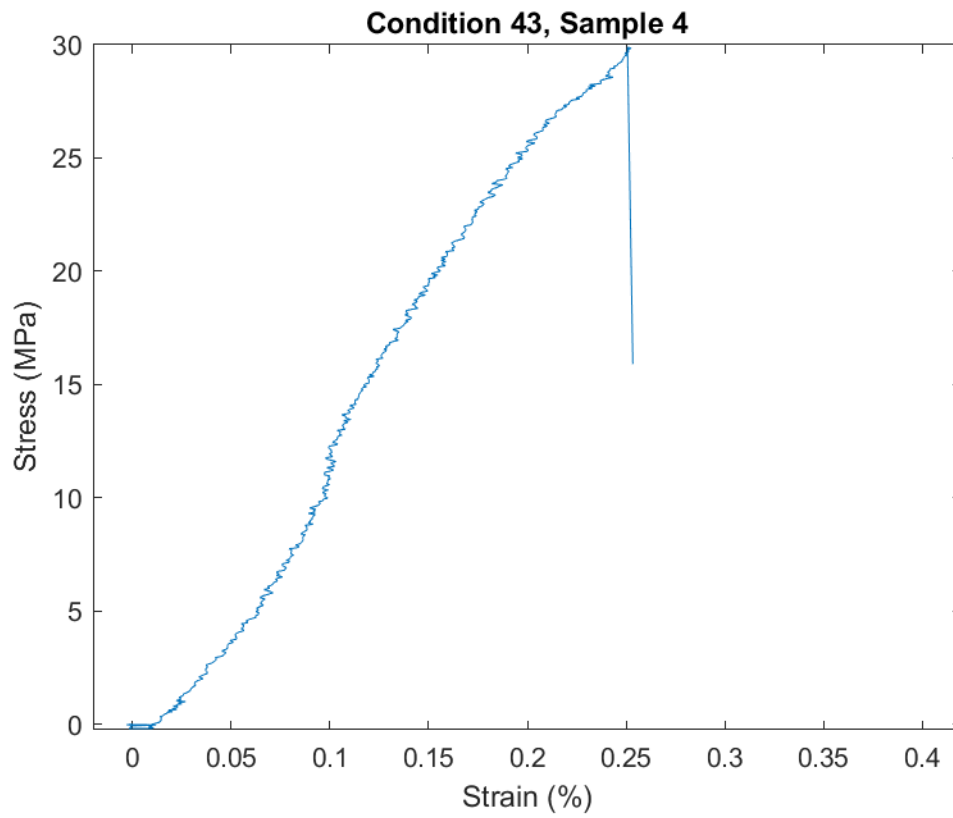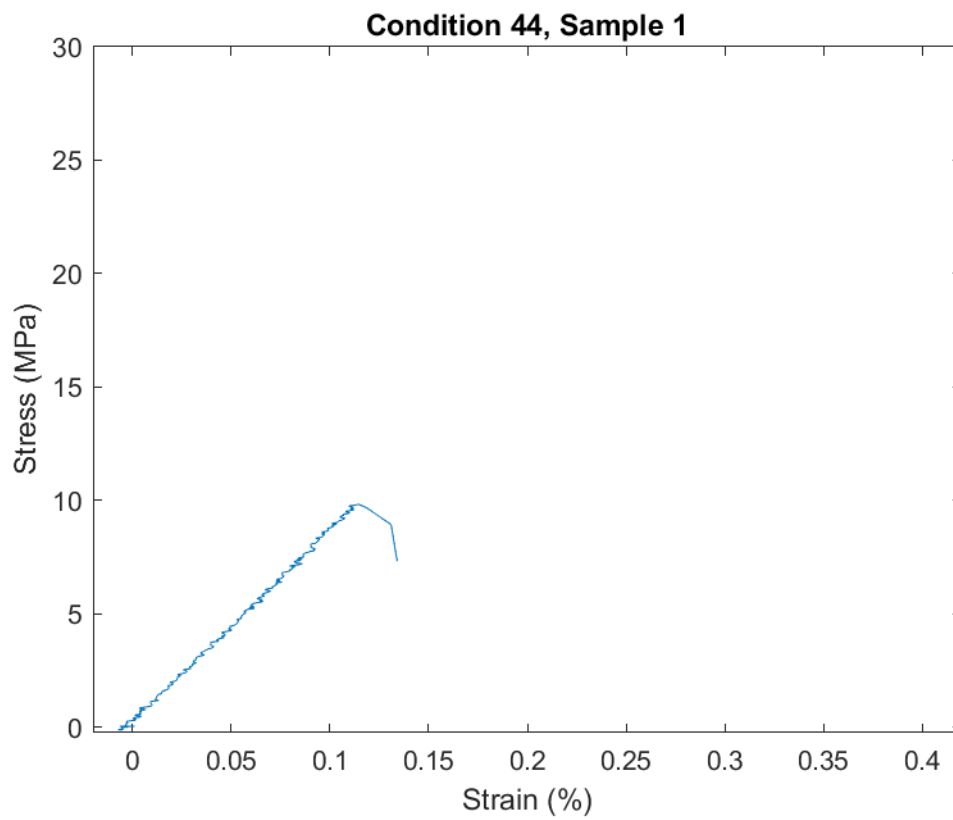

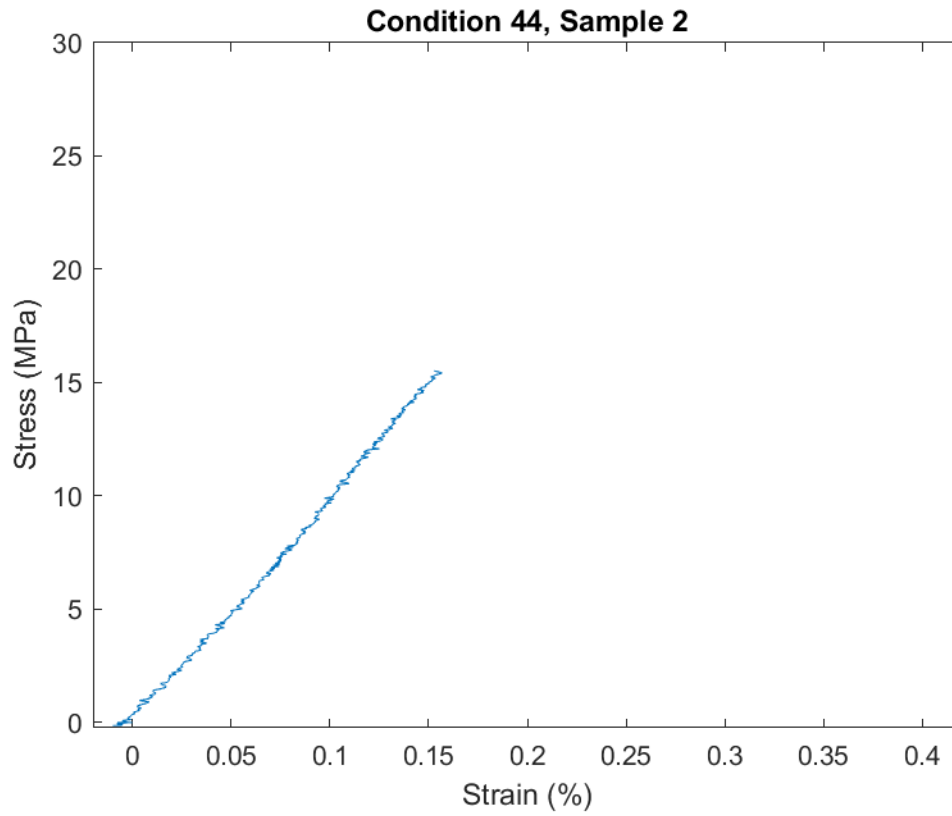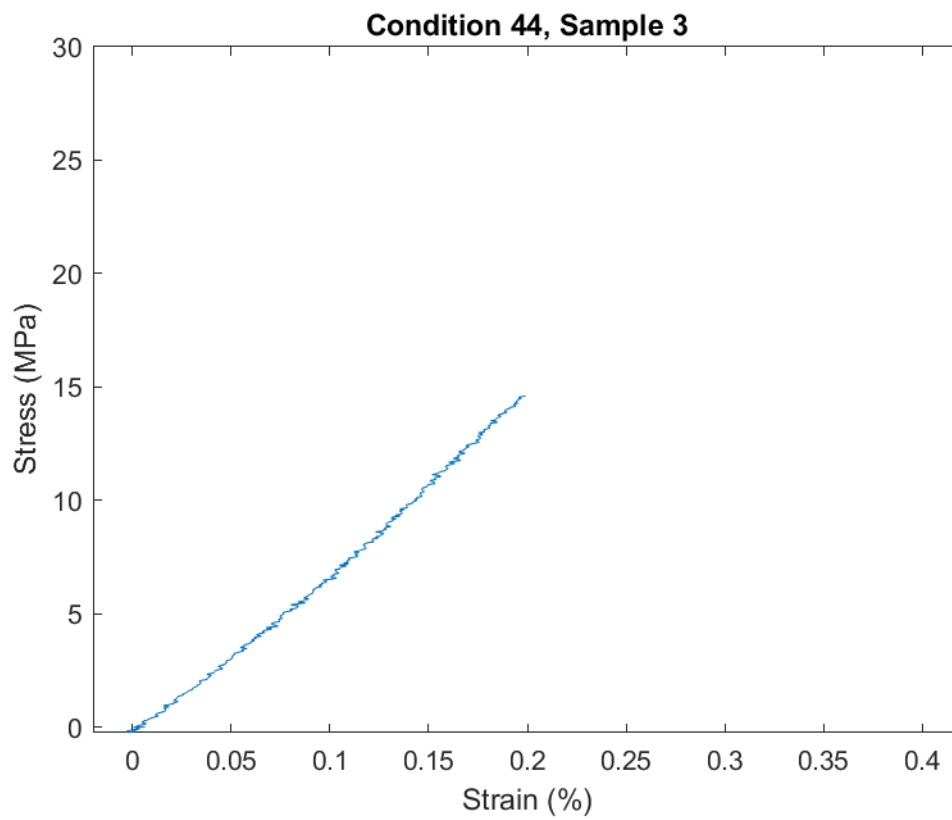

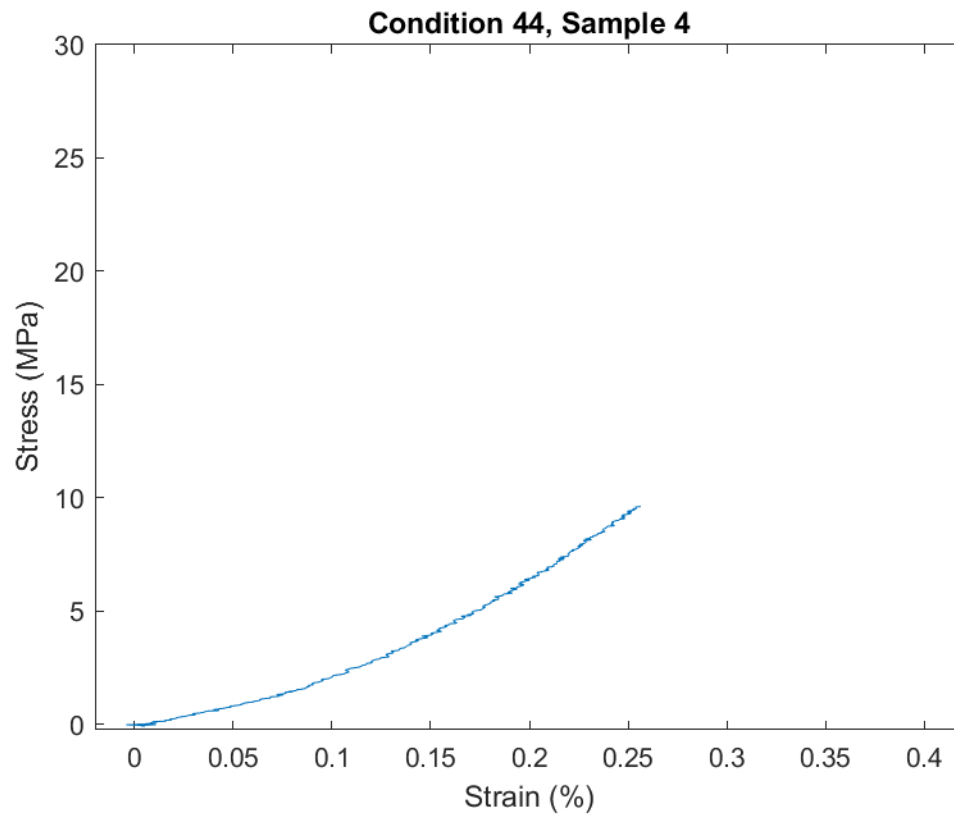

Supplement: Supplementary file 1 [file 980d67dc3e926011f380f563.pdf]
